# Supplementary material for: Role of C, S, Se and P donor ligands in copper(i) mediated C–N and C–Si bond formation reactions
Source: Royal Society of Chemistry journal article supplement (doi:10.1039/c8ra06057f), 2018-01-01
Supplement: c8ra06057f1.pdf [file c8ra06057f1.pdf]

**Role of C, S, Se and P Donor Ligands in Copper(I) Mediated C–N and C–Si Bond Formation  
Reactions**

Katam Srinivas<sup>a</sup> and Ganesan Prabusankar<sup>\*a</sup>

*Department of Chemistry, Indian Institute of Technology Hyderabad, Kandi, Sangareddy,  
Telangana, INDIA-502 285. Fax: +91 40 2301 6032; Tel: +91 40 2301 6089; E-mail:  
prabu@iith.ac.in.*

# Supporting Information: Part 1

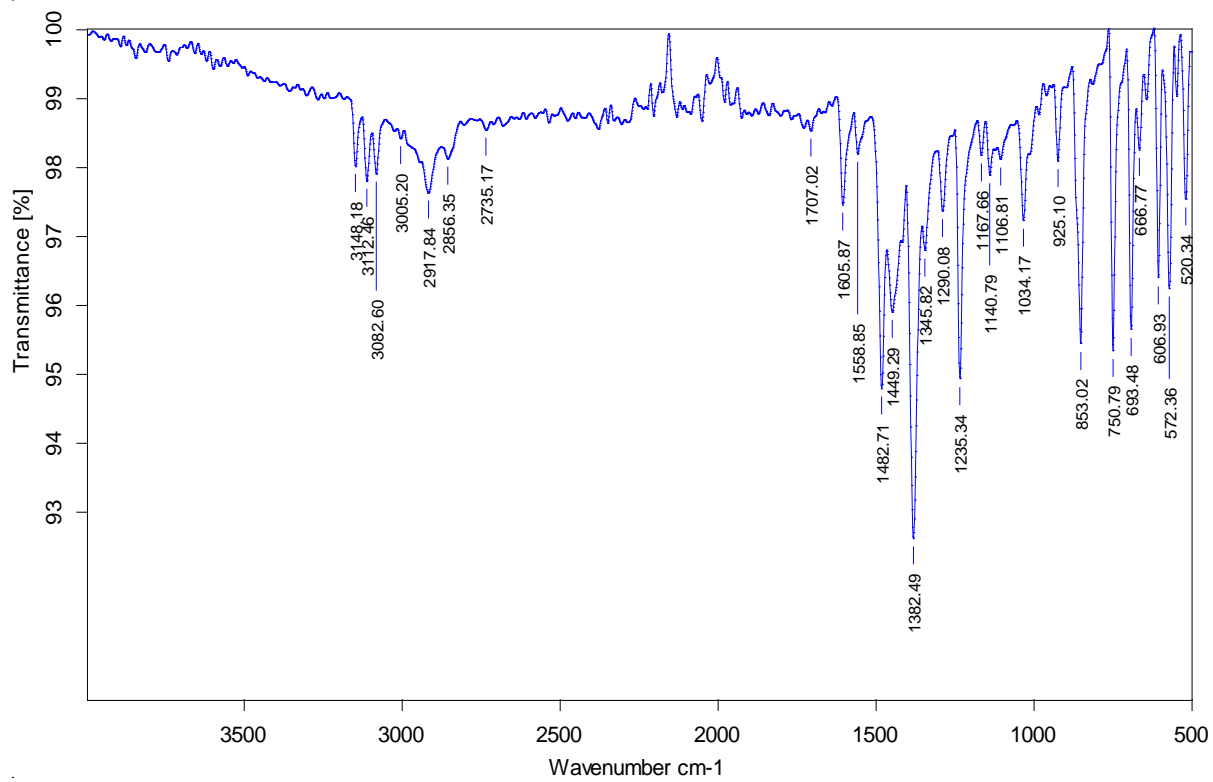

**Fig. S1.** Neat FT-IR spectrum of [(IMes=S)Cu]Cl (**1**) at room temperature.

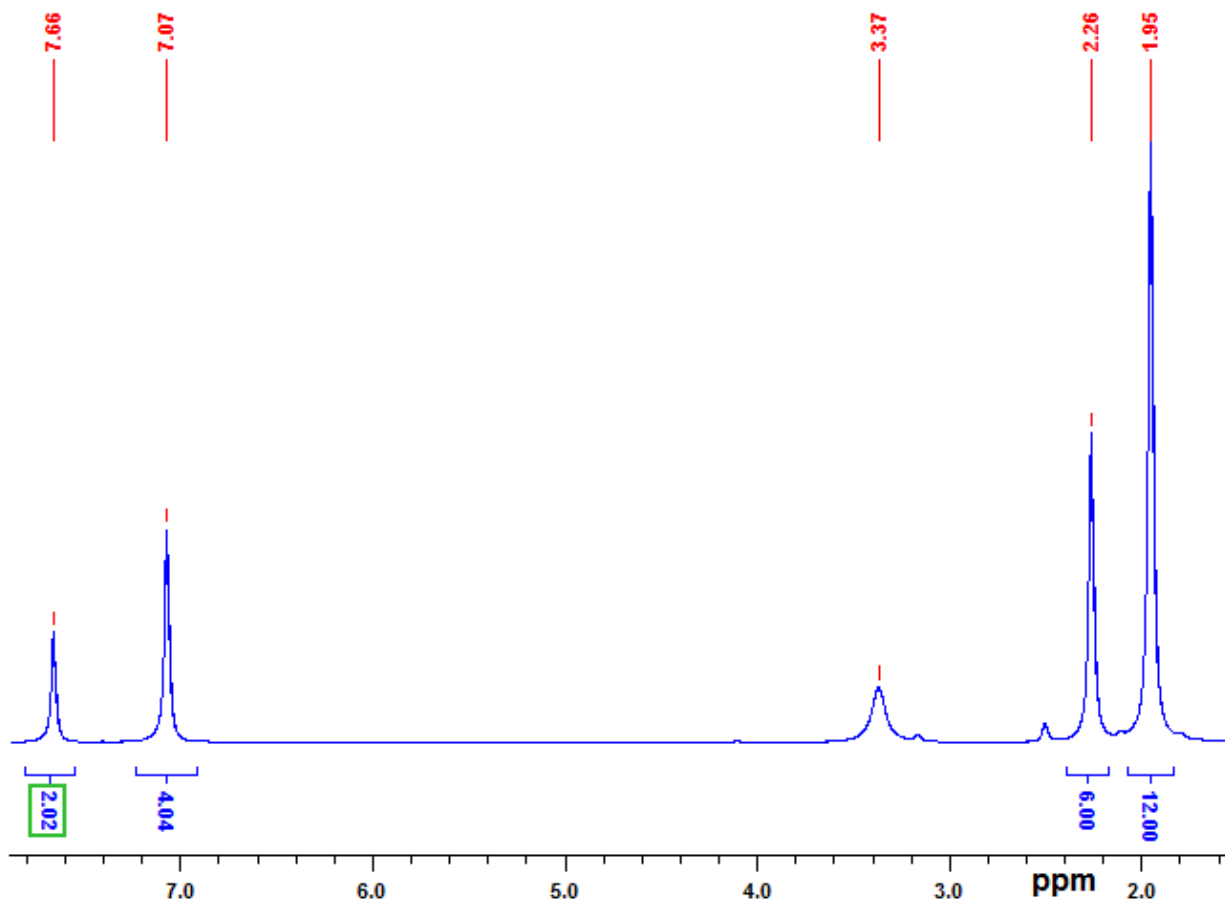

Fig. S2.  $^1\text{H}$  NMR spectrum of  $[(\text{IMes}=\text{S})\text{Cu}]\text{Cl}$  (1) in  $\text{DMSO-}d_6$  at room temperature.

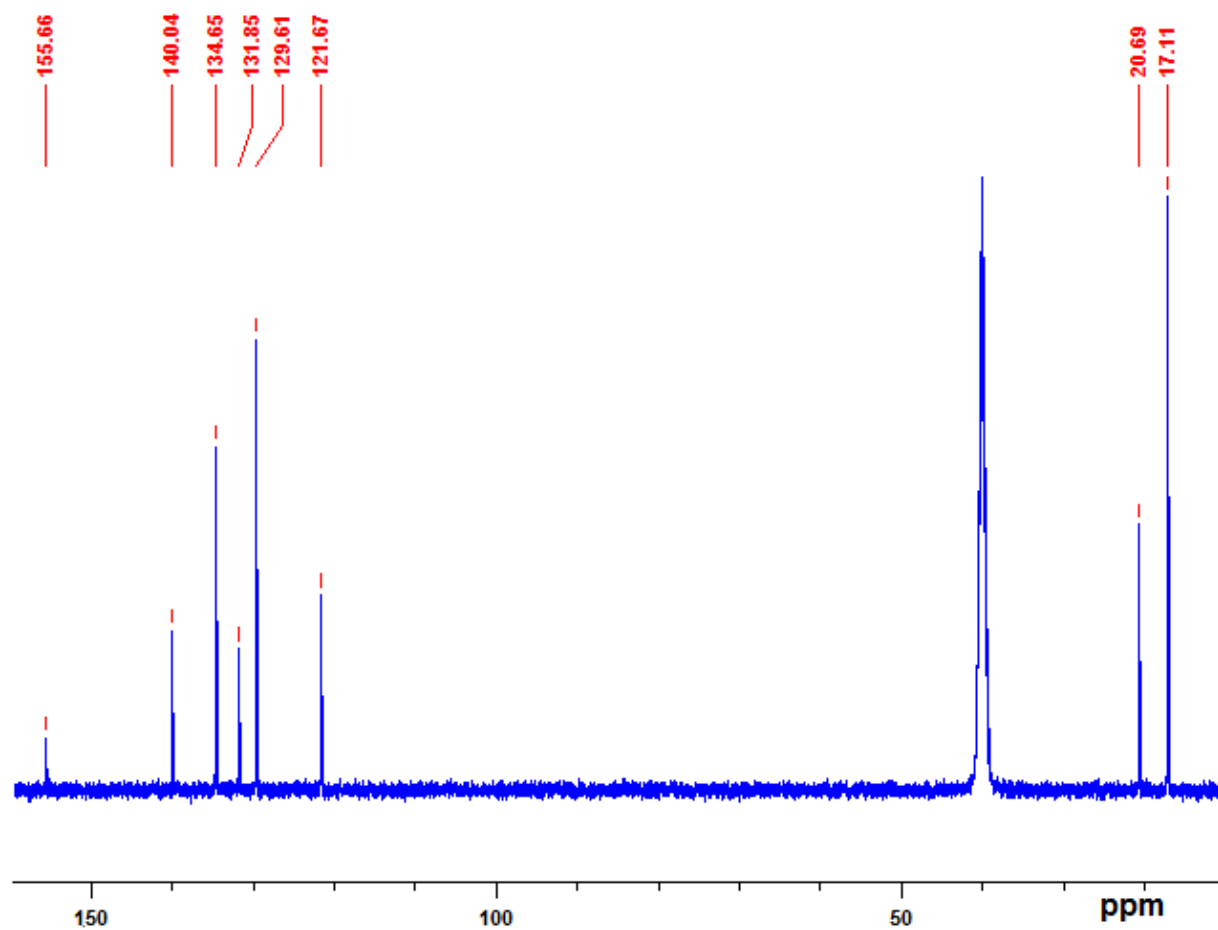

**Fig. S3.**  $^{13}\text{C}$  NMR spectrum of  $[(\text{IMes}=\text{S})\text{Cu}]\text{Cl}$  (1) in  $\text{DMSO-}d_6$  at room temperature.

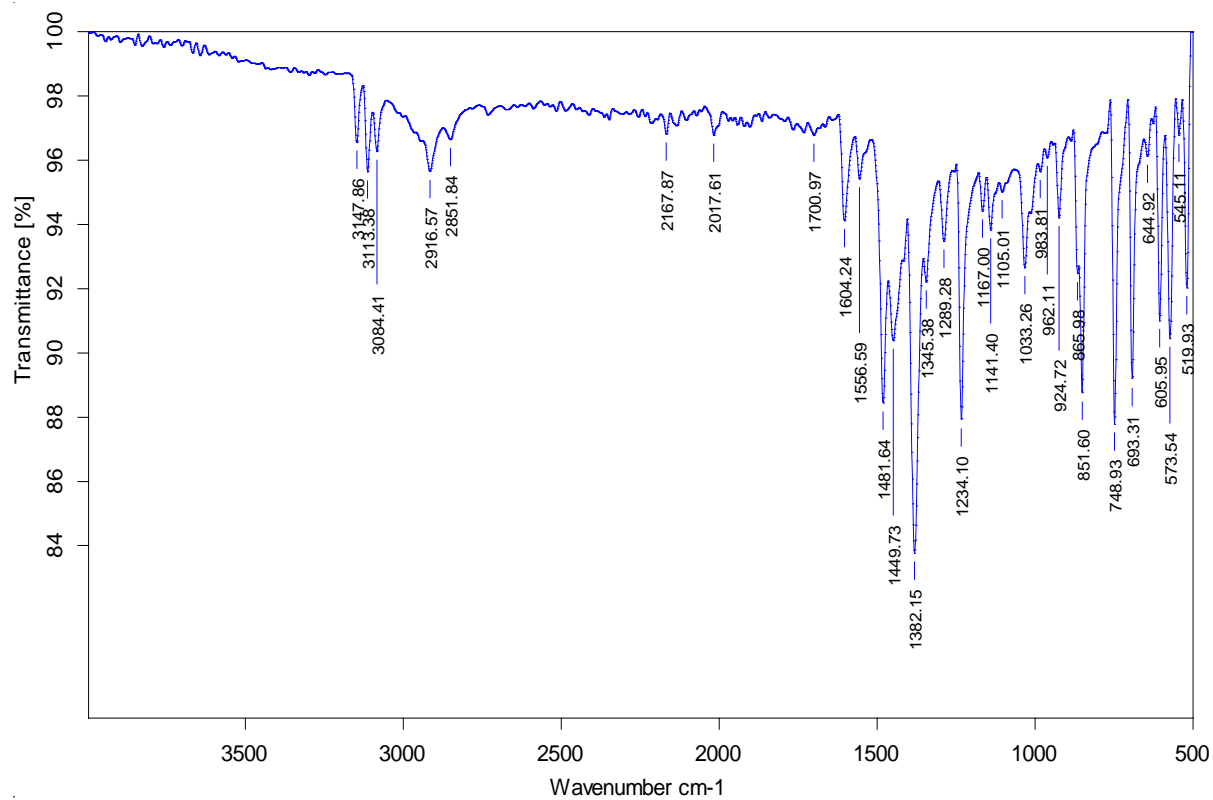

**Fig. S4.** Neat FT-IR spectrum of [(IMes=S)Cu]Br (2) at room temperature.

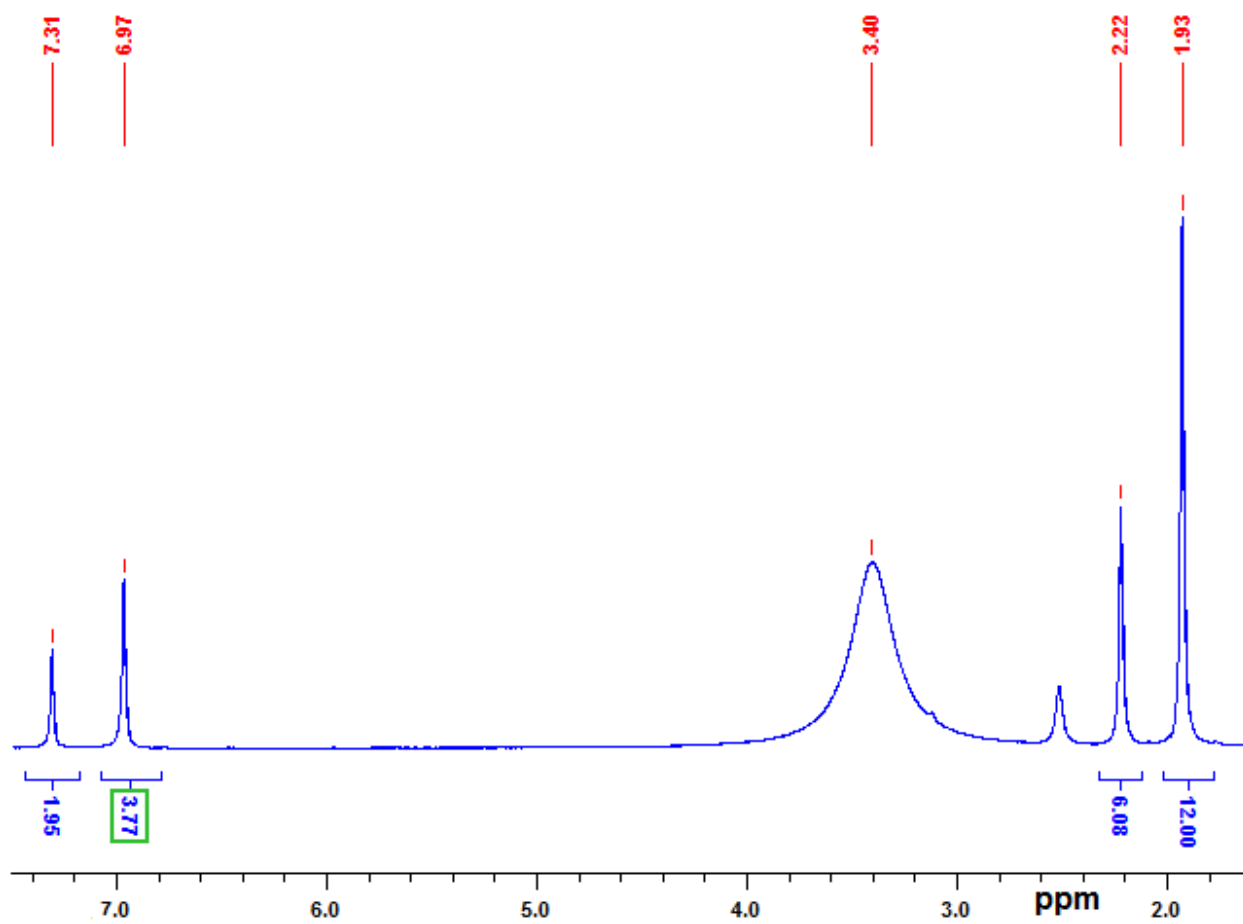

**Fig. S5.**  $^1\text{H}$  NMR spectrum of  $[(\text{IMes}=\text{S})\text{Cu}]\text{Br}$  (2) in  $\text{DMSO-}d_6$  at room temperature.

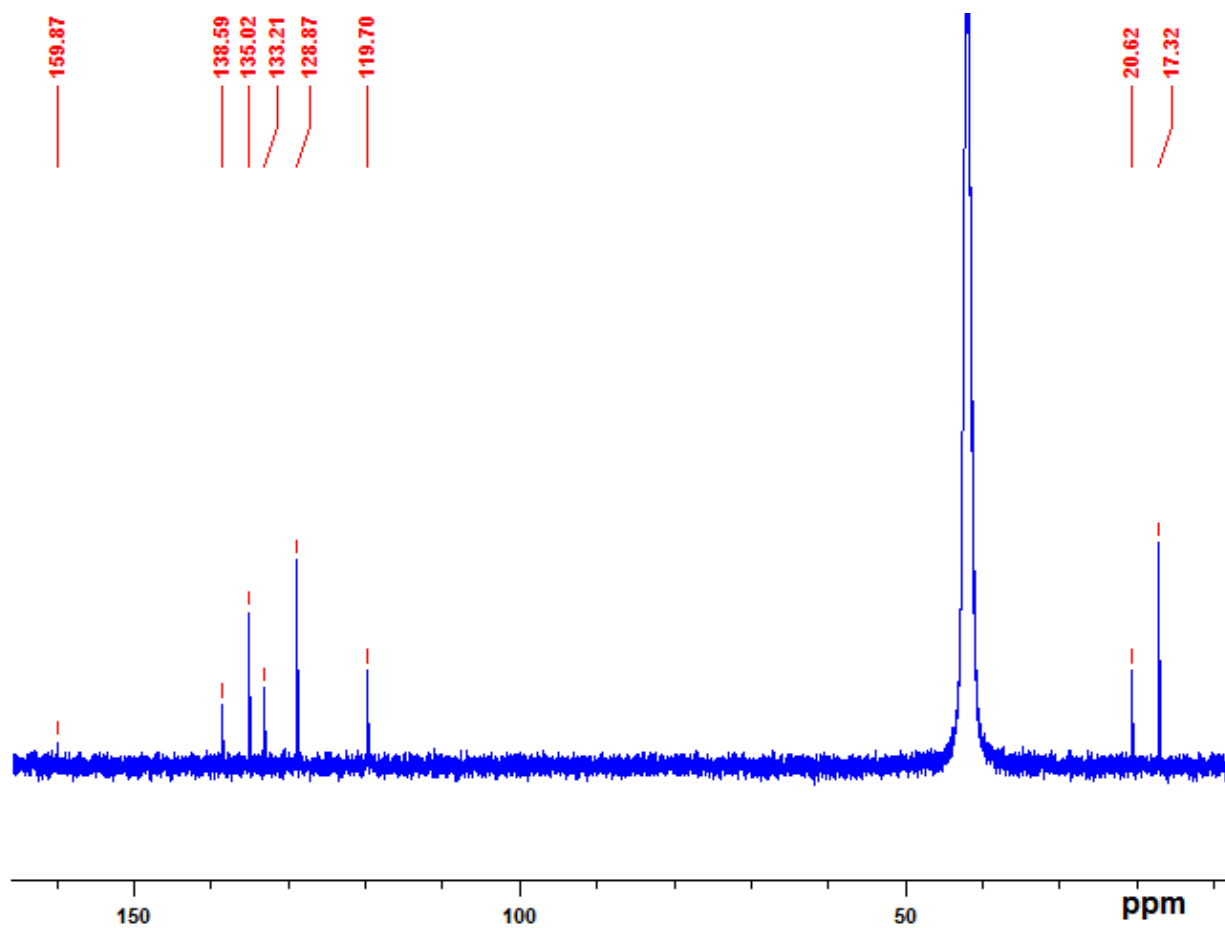

**Fig. S6.**  $^{13}\text{C}$  NMR spectrum of  $[(\text{IMes}=\text{S})\text{Cu}]\text{Br}$  (2) in  $\text{DMSO-}d_6$  at room temperature.

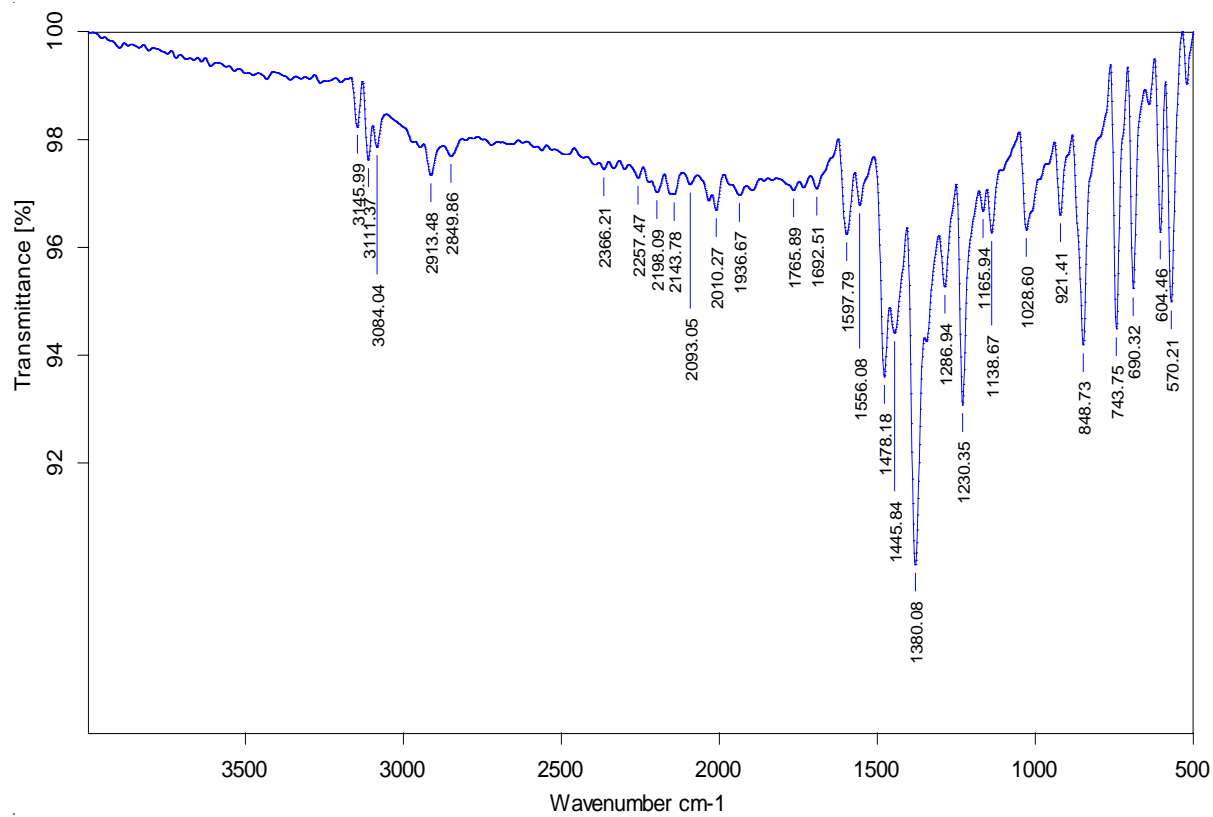

**Fig. S7.** Neat FT-IR spectrum of [(IMes=S)Cu]I (**3**) at room temperature.



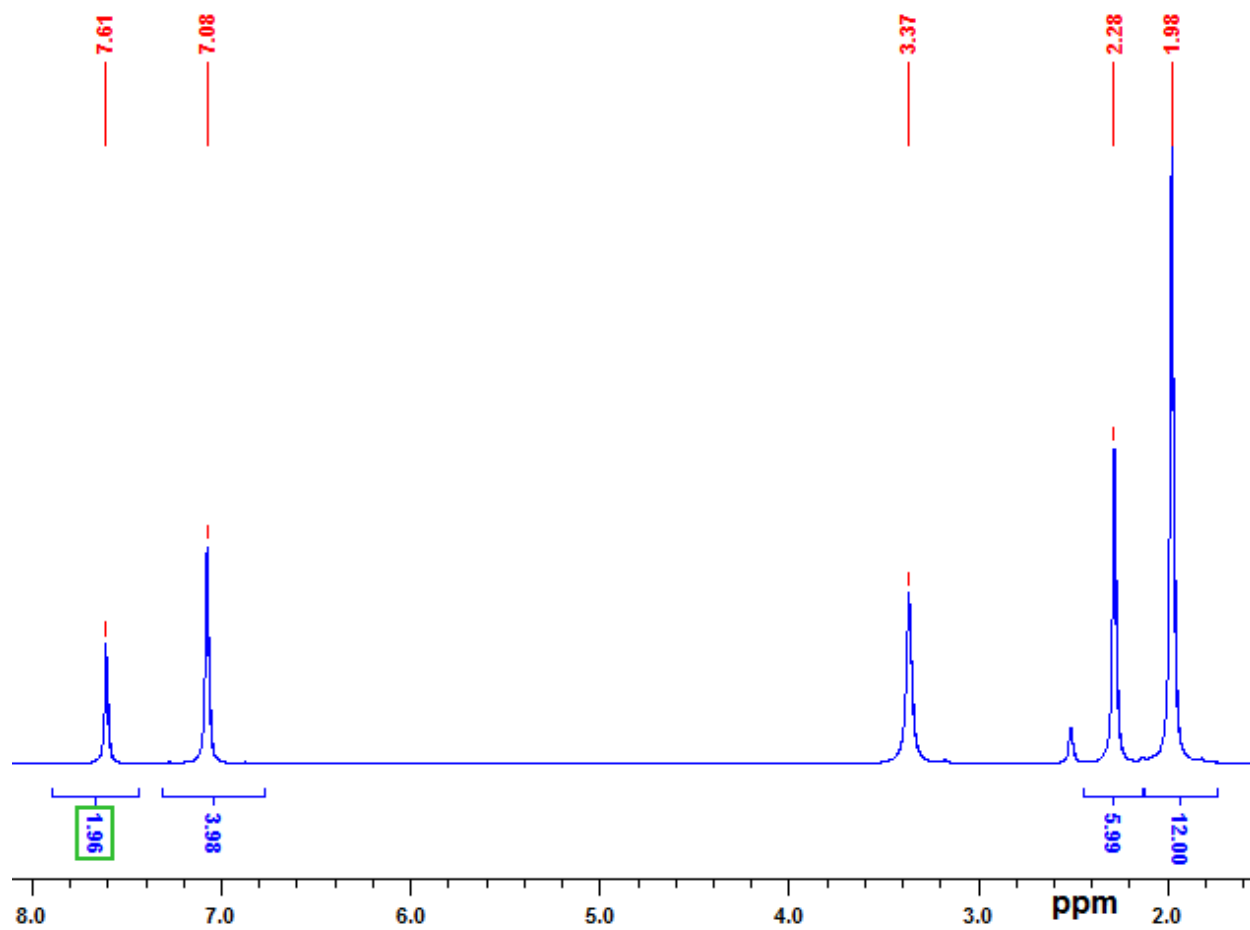

**Fig. S8.**  $^1\text{H}$  NMR spectrum of  $[(\text{IMes}=\text{S})\text{Cu}]\text{I}$  (3) in  $\text{DMSO-}d_6$  at room temperature.

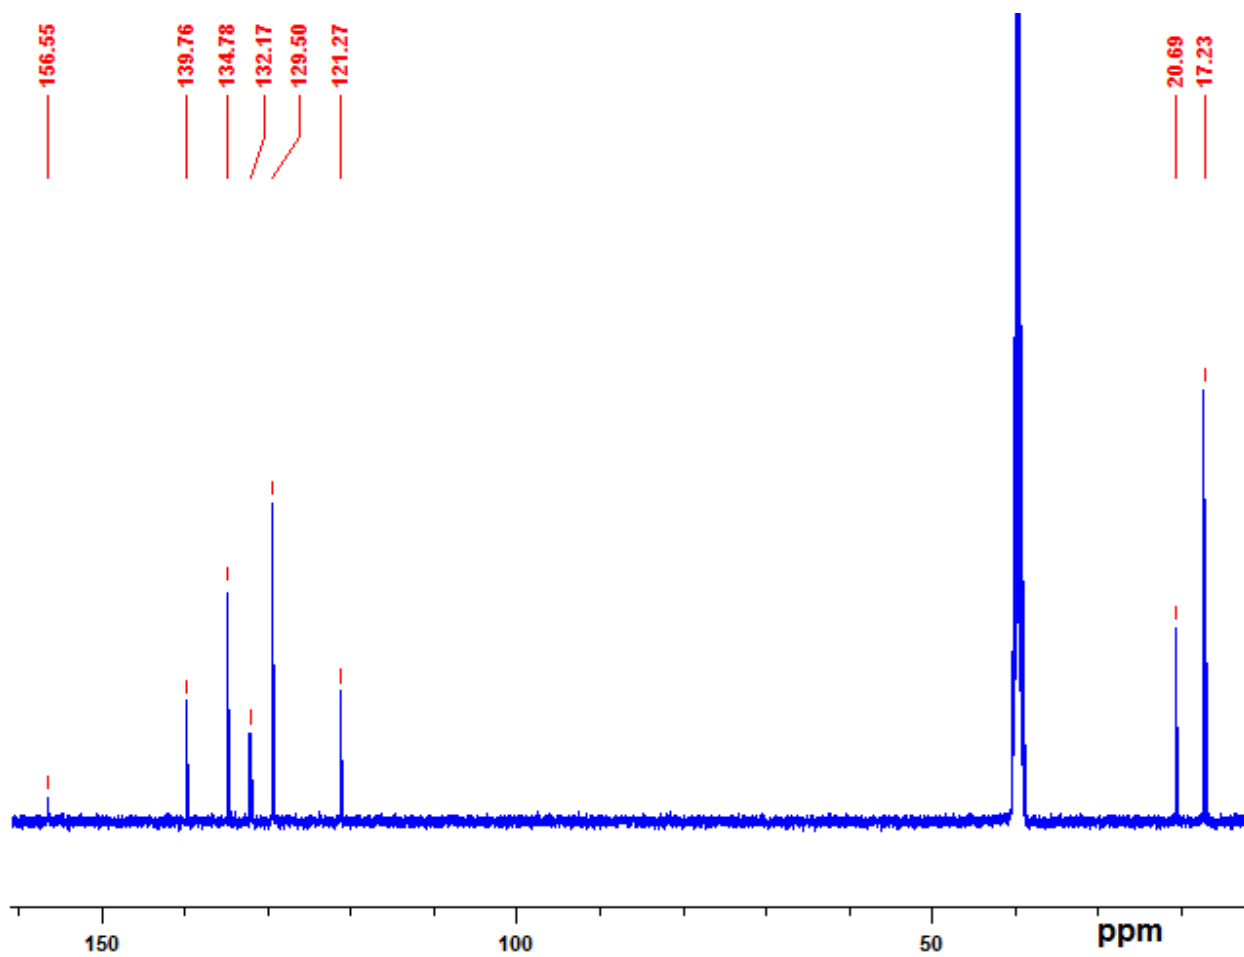

**Fig. S9.**  $^{13}\text{C}$  NMR spectrum of  $[(\text{IMes}=\text{S})\text{Cu}]\text{I}$  (**3**) in  $\text{DMSO-}d_6$  at room temperature.

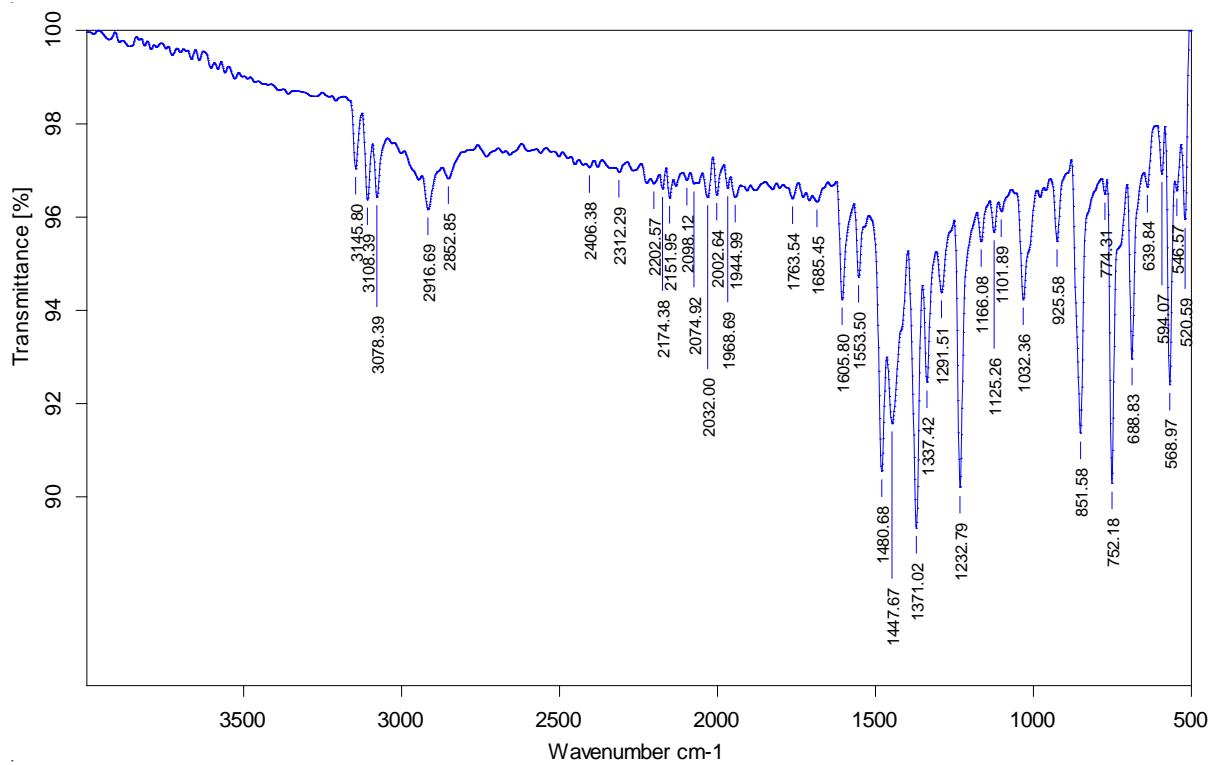

**Fig. S10.** Neat FT-IR spectrum of [(IMes=Se)Cu]Br (**4**) at room temperature.

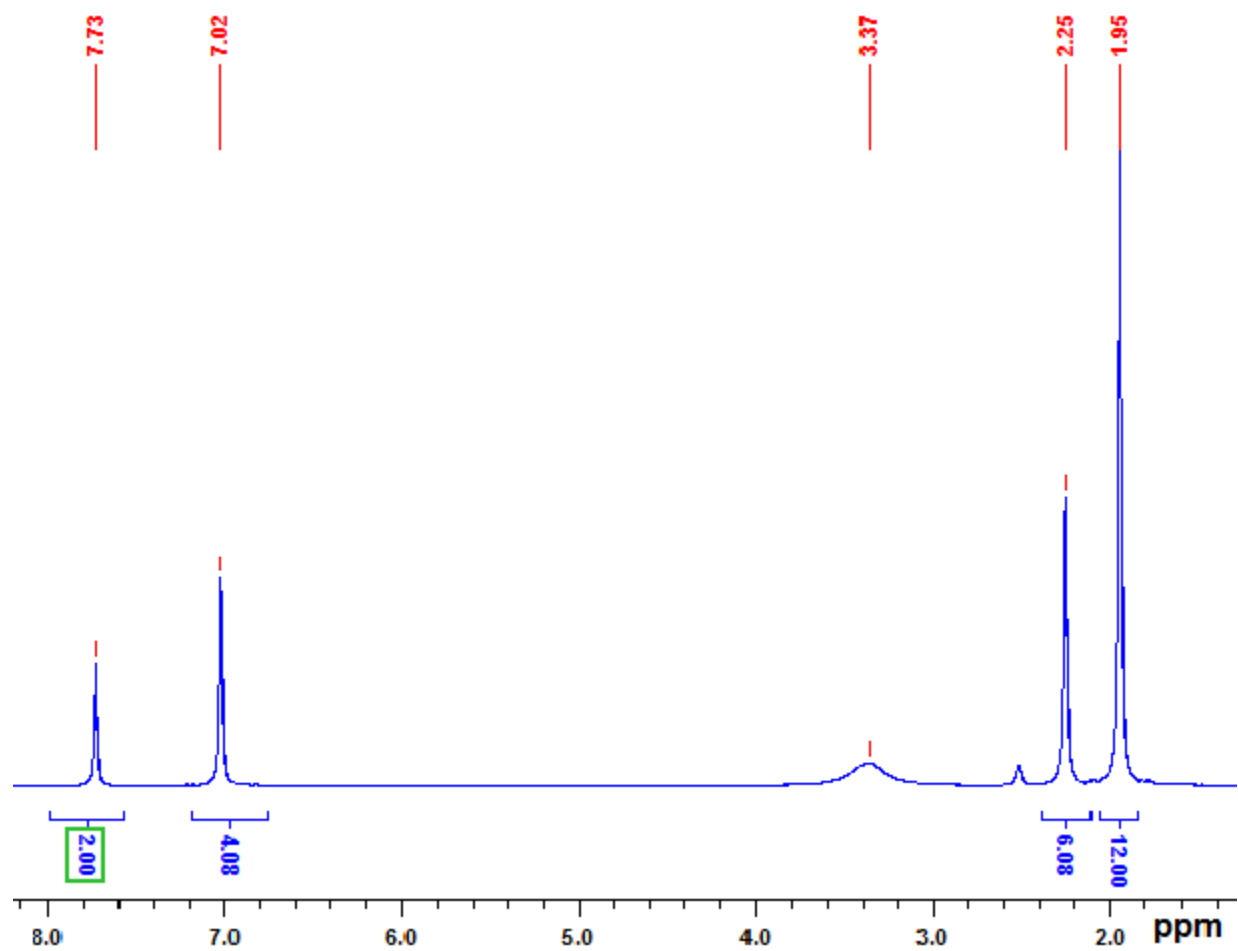

**Fig. S11.**  $^1\text{H}$  NMR spectrum of  $[(\text{IMes}=\text{Se})\text{Cu}]\text{Br}$  (4) in  $\text{DMSO}-d_6$  at room temperature.

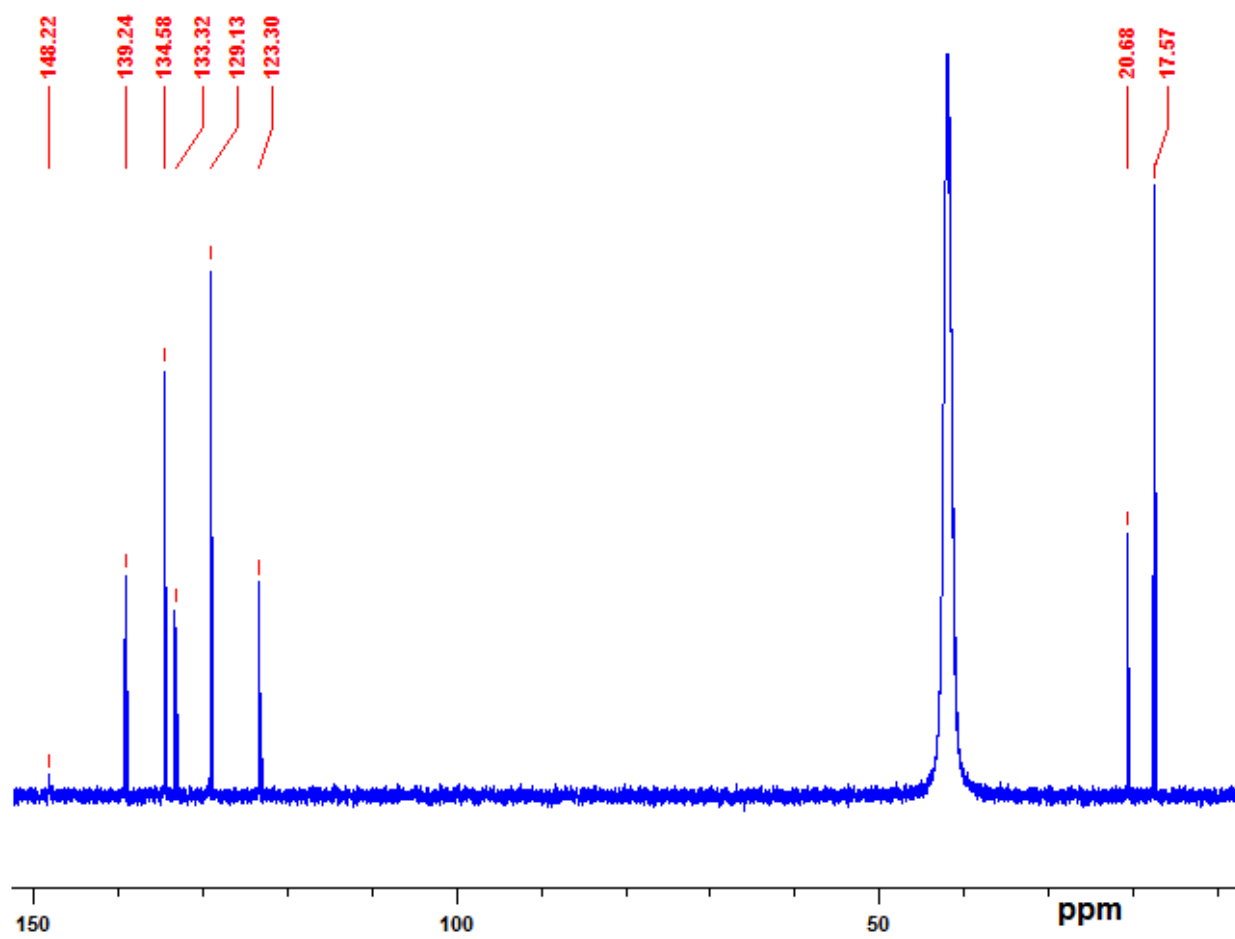

**Fig. S12.**  $^{13}\text{C}$  NMR spectrum of  $[(\text{IMes}=\text{Se})\text{Cu}]\text{Br}$  (4) in  $\text{DMSO-}d_6$  at room temperature.

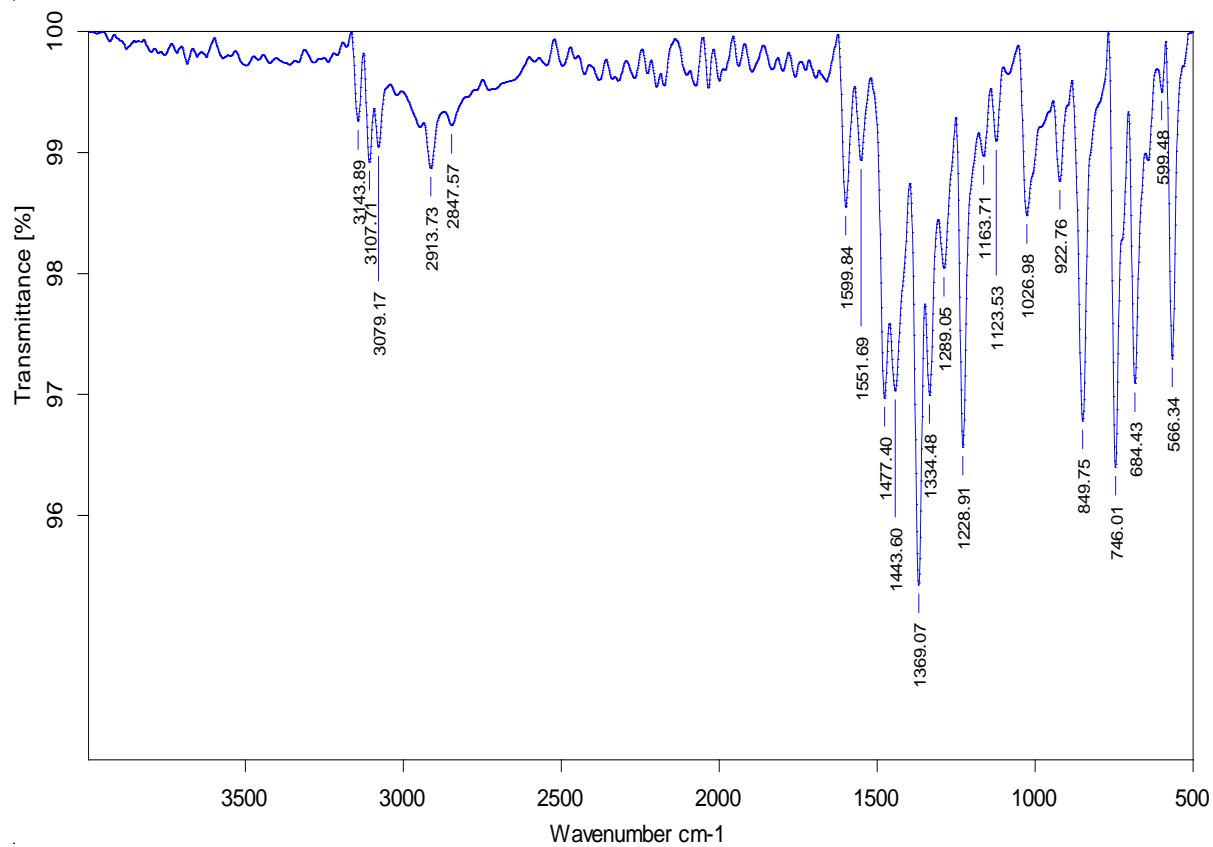

**Fig. S13.** Neat FT-IR spectrum of [(IMes=Se)Cu]I (**5**) at room temperature.

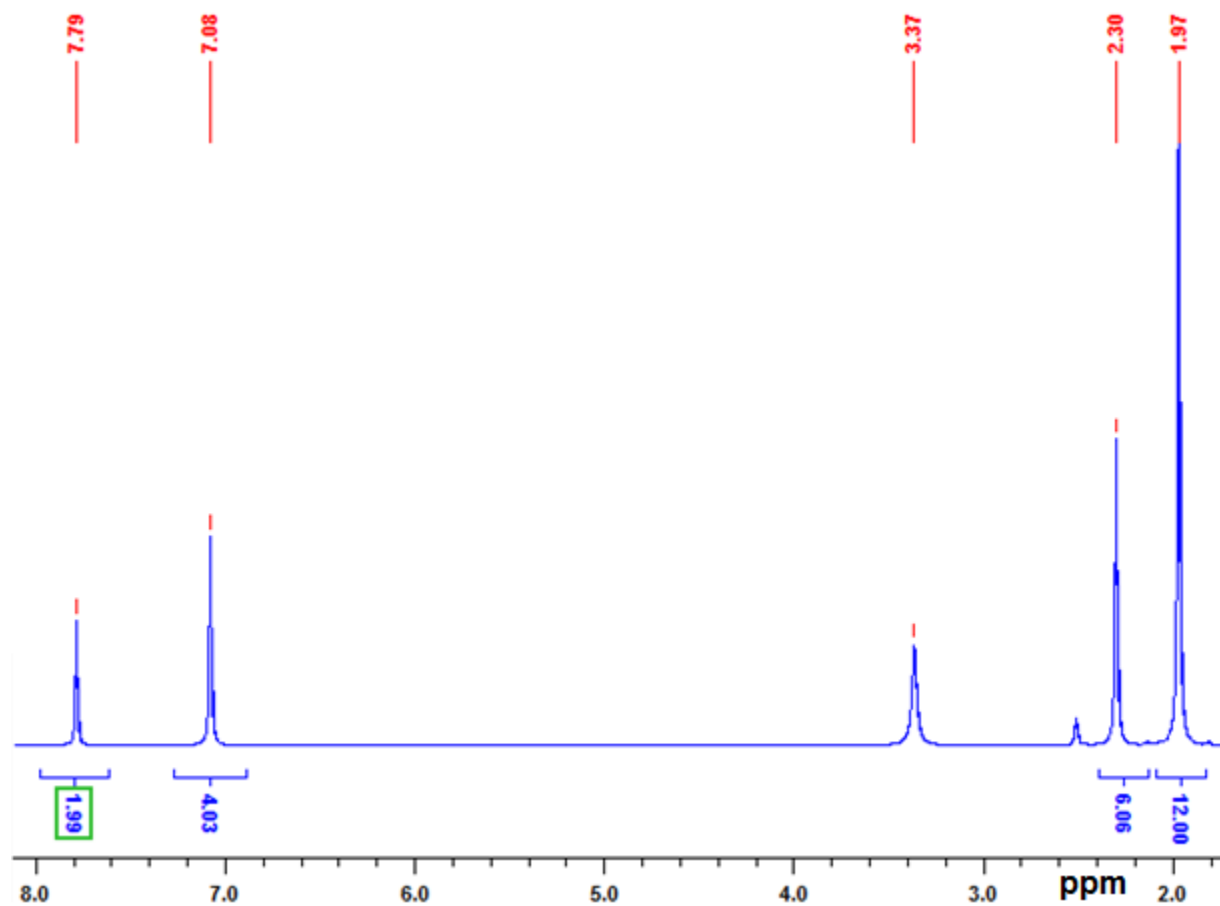

**Fig. S14.**  $^1\text{H}$  NMR spectrum of  $[(\text{IMes}=\text{Se})\text{Cu}]\text{I}$  (5) in  $\text{DMSO-}d_6$  at room temperature.

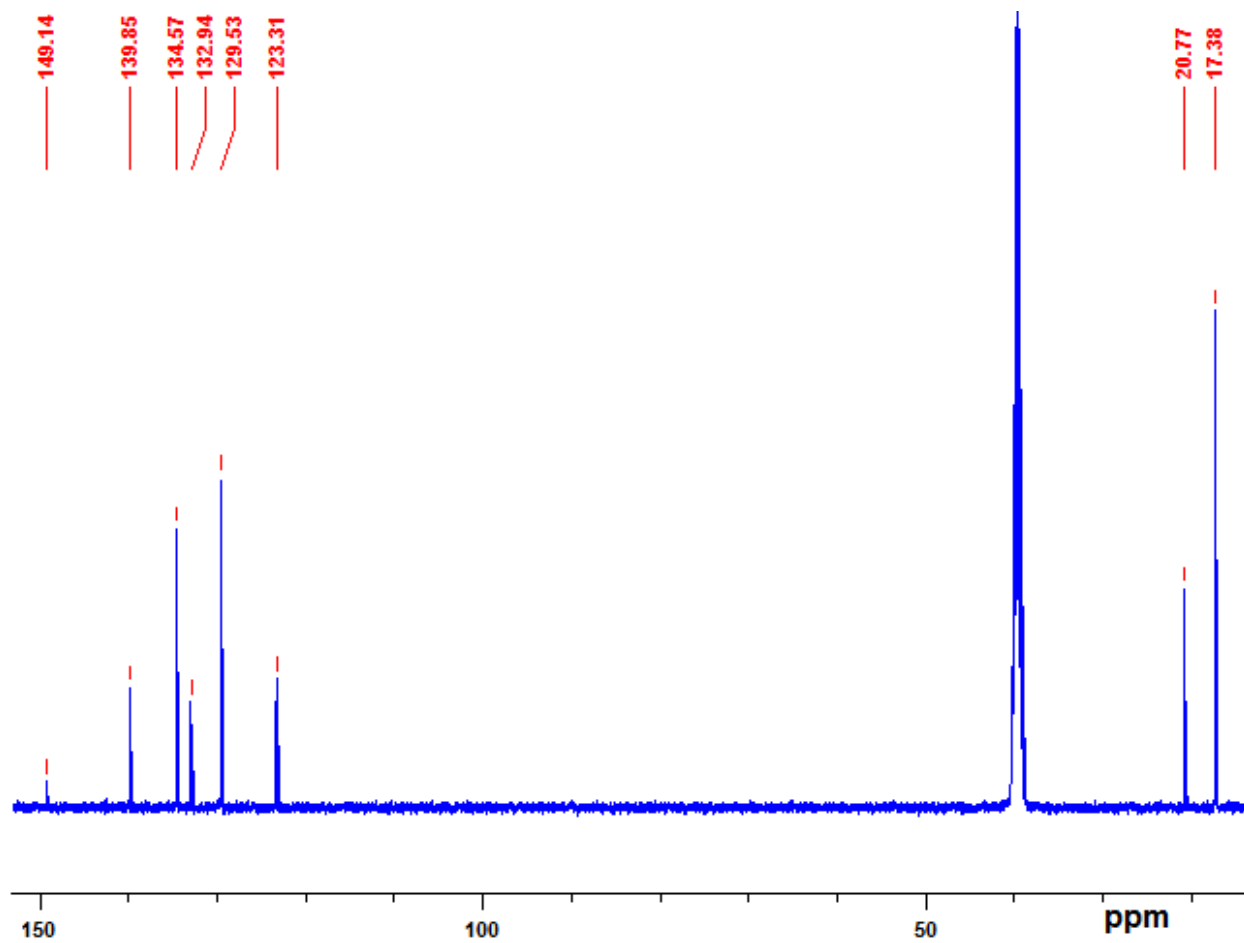

**Fig. S15.**  $^{13}\text{C}$  NMR spectrum of  $[(\text{IMes}=\text{Se})\text{Cu}]\text{I}$  (5) in  $\text{DMSO-}d_6$  at room temperature.



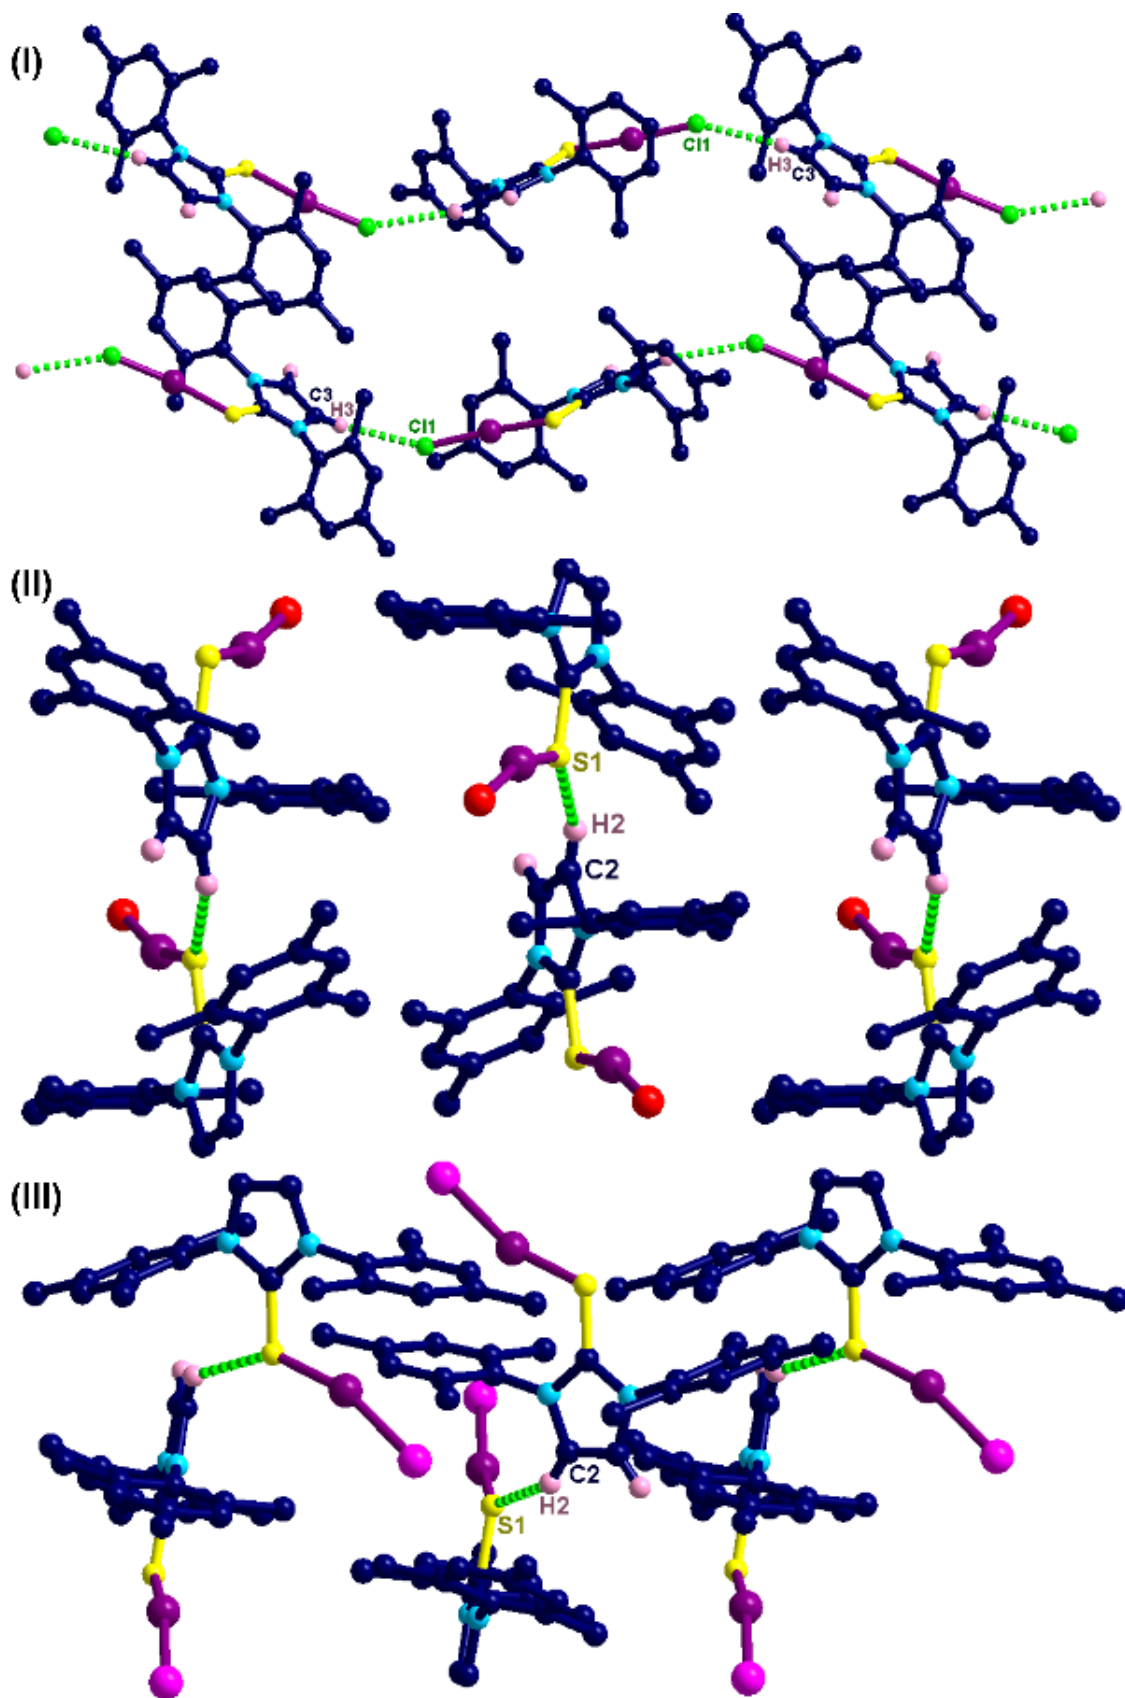

**Fig. 16.** (I) Molecular packing arrangement of **1** with extended C–H···Cl hydrogen bonding interactions. Non-interacting hydrogen atoms have been omitted for the clarity. D···A distances [Å]: H(3)···Cl(1), 2.8116(2); C–D···A angles [°]: C(3)–H(3)···Cl(1), 164.549(3). (II) Molecular packing arrangement of **2** with extended C–H···S hydrogen bonding interactions. Non-interacting hydrogen atoms have been omitted for the clarity. D···A distances [Å]: H(2)···S(1), 3.1008(1); C–D···A angles [°]: C(2)–H(2)···S(1), 134.838(1); C(1)–S(1)···H(2), 106.654(1). (III) Molecular packing arrangement of **3** with extended C–H···S hydrogen bonding interactions. Non-interacting hydrogen atoms have been omitted for the clarity. D···A distances [Å]: H(2)···S(1), 3.0441(3); C–D···A angles [°]: C(2)–H(2)···S(1), 136.506(7); C(1)–S(1)···H(2), 106.816(4).

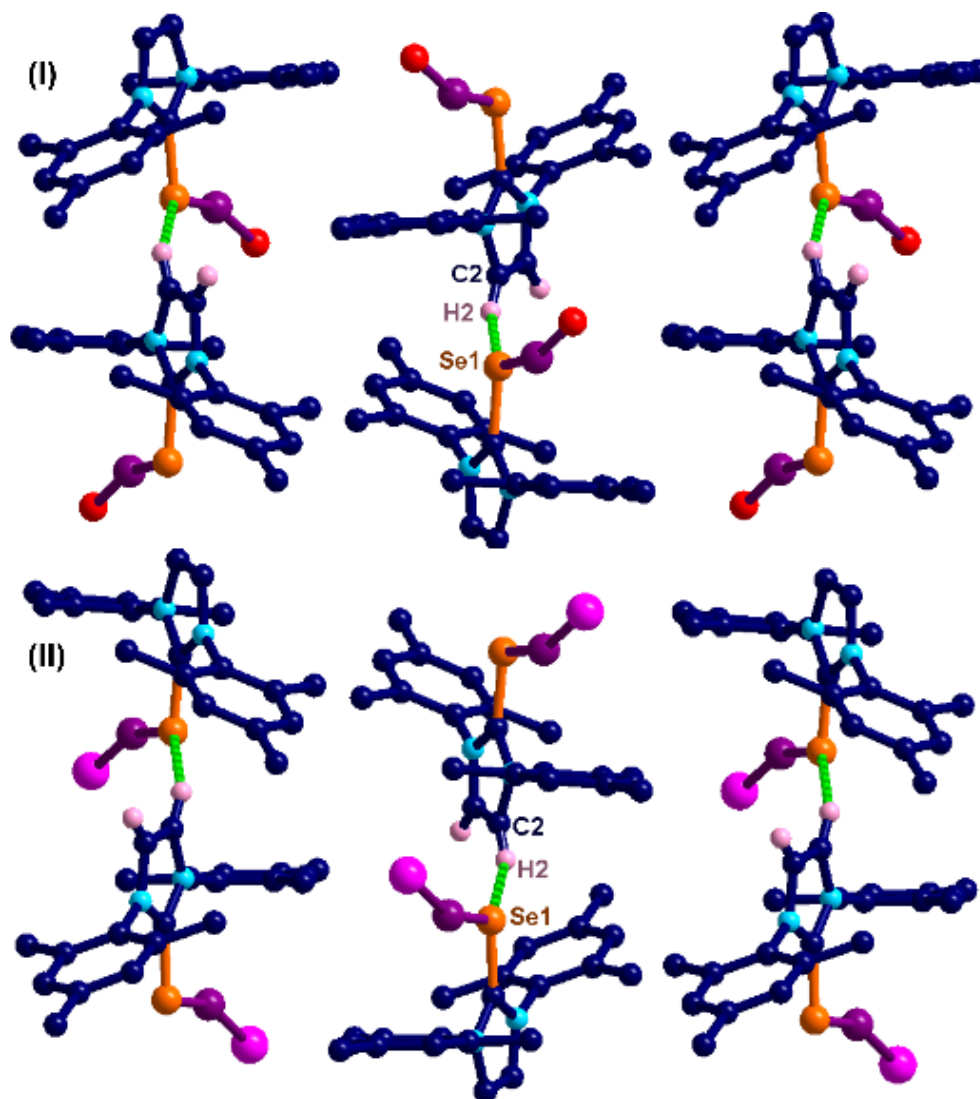

**Fig. 17.** (I) Molecular packing arrangement of **4** with extended C–H···Se hydrogen bonding interactions. Non-interacting hydrogen atoms have been omitted for the clarity. D···A distances [Å]: H(2)···Se(1), 3.1576(1); C–D···A angles [°]: C(2)–H(2)···Se(1), 132.740(3); C(1)–Se(1)···H(2), 105.844(2). (II) Molecular packing arrangement of **3** with extended C–H···Se hydrogen bonding interactions. Non-interacting hydrogen atoms have been omitted for the clarity. D···A distances [Å]: H(2)···Se(1), 3.1241(1); C–D···A angles [°]: C(2)–H(2)···Se(1), 132.134(3); C(1)–Se(1)···H(2), 104.541(1).

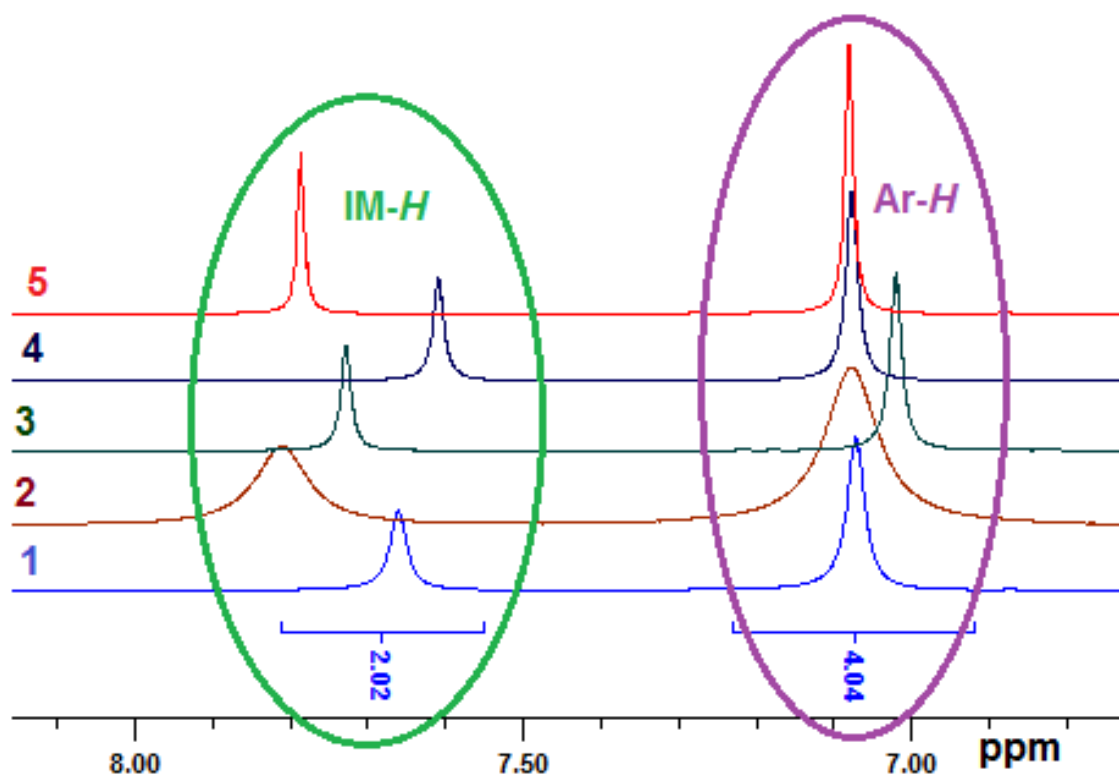

**Fig. 18.** Section of  $^1\text{H}$  NMR spectra (400 MHz,  $\text{DMSO-}d_6$ ) displays the aryl region among **1-5**.

### Synthesis of [(IMes)CuCl] (**6**)

**6** was synthesized as reported earlier and the spectral data matching with the reports.<sup>ref</sup>  $^1\text{H}$  NMR (400 MHz,  $\text{CDCl}_3$ ):  $\delta$  = 7.05 (s, 2H, ImH), 6.99 (s, 4H,  $\text{CH}_{\text{meta}}$ ), 2.34 (s, 6H,  $\text{CH}_{3\text{para}}$ ), 2.10 (s, 12H,  $\text{CH}_{3\text{ortho}}$ ) ppm.  $^{13}\text{C}$  NMR (100 MHz,  $\text{CDCl}_3$ ):  $\delta$  = 177.66 (C–Cu), 139.50, 135.08, 134.57, 129.49, 122.30 (ArC), 21.12 ( $p\text{-CH}_3$ ), 17.77 ( $o\text{-CH}_3$ ) ppm. FT-IR (neat):  $\bar{\nu}$  = 3096(m), 2913(w), 1690(s), 1562(w), 1481(s), 1402(w), 1242(s), 1170(m), 1043(w), 928(w), 859(s), 736(s), 567(m)  $\text{cm}^{-1}$ .

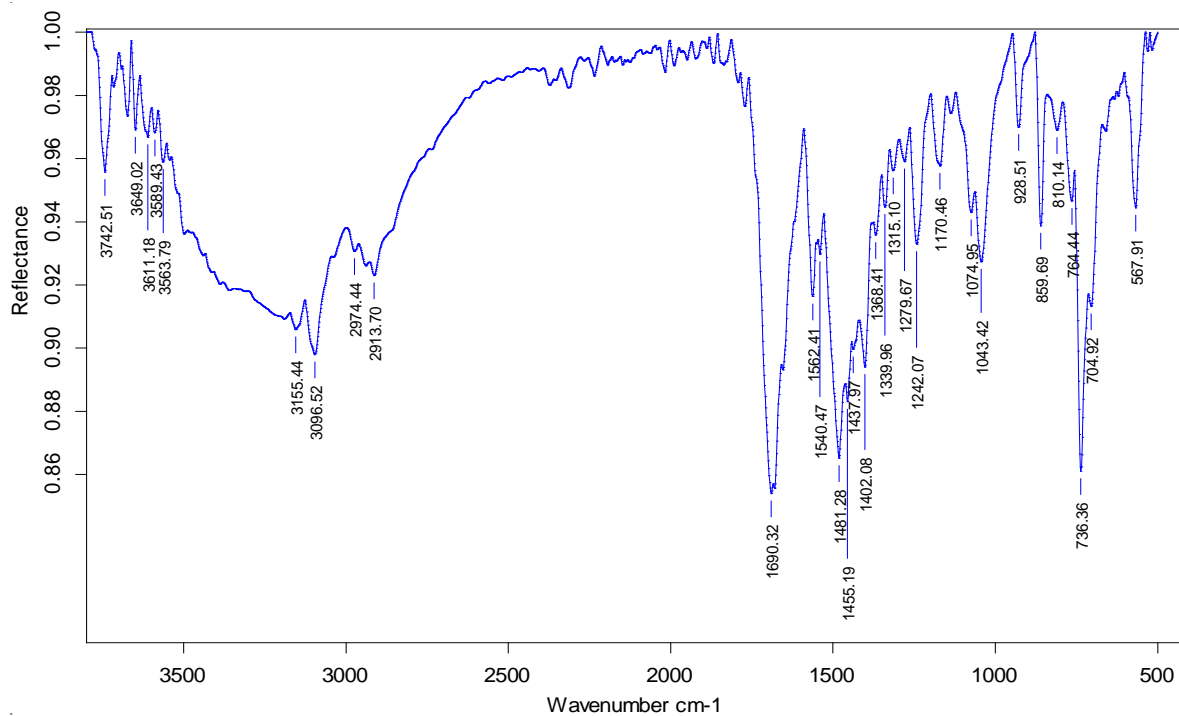

**Fig. S19.** Neat FT-IR spectrum of [(IMes)CuCl] (6) at room temperature.

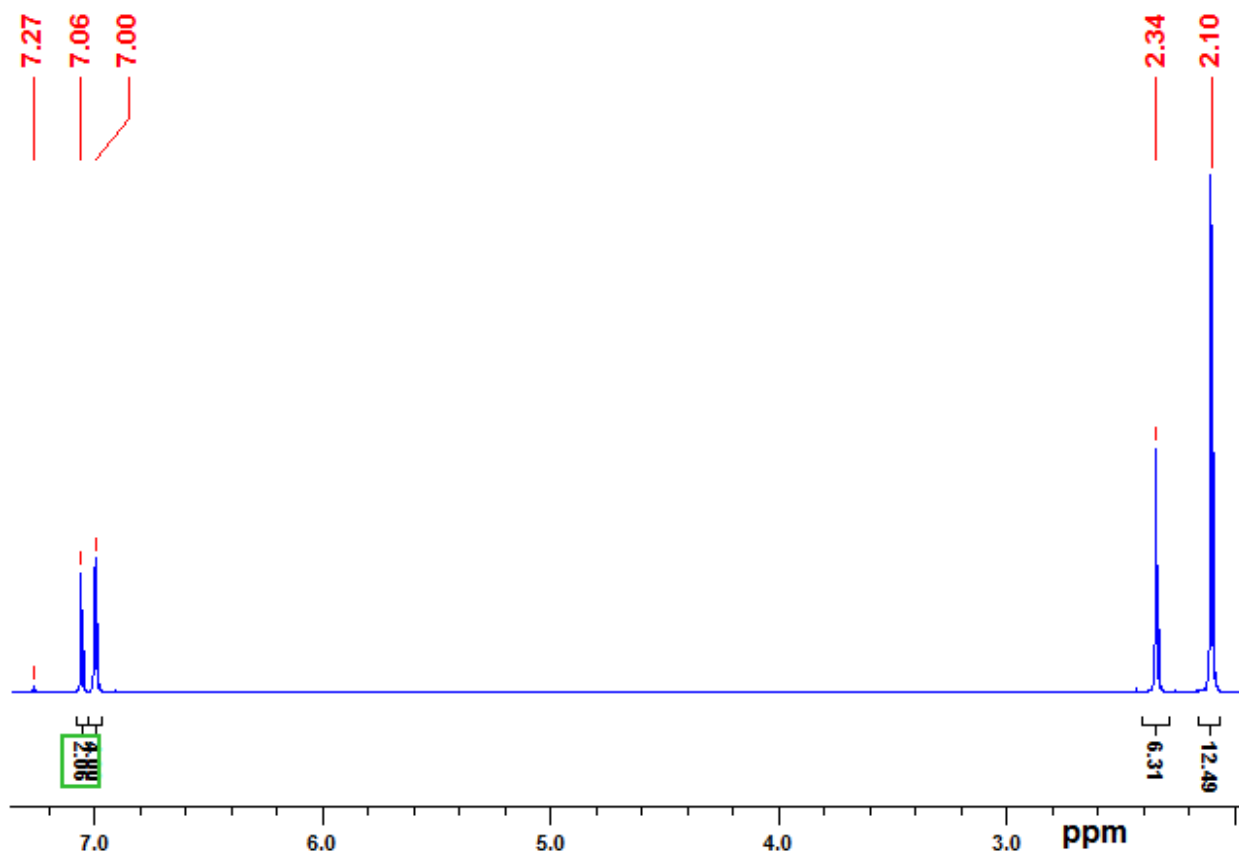

**Fig. S20.**  $^1\text{H}$  NMR spectrum of  $[(\text{IMes})\text{CuCl}]$  (**6**) in  $\text{CDCl}_3$  at room temperature.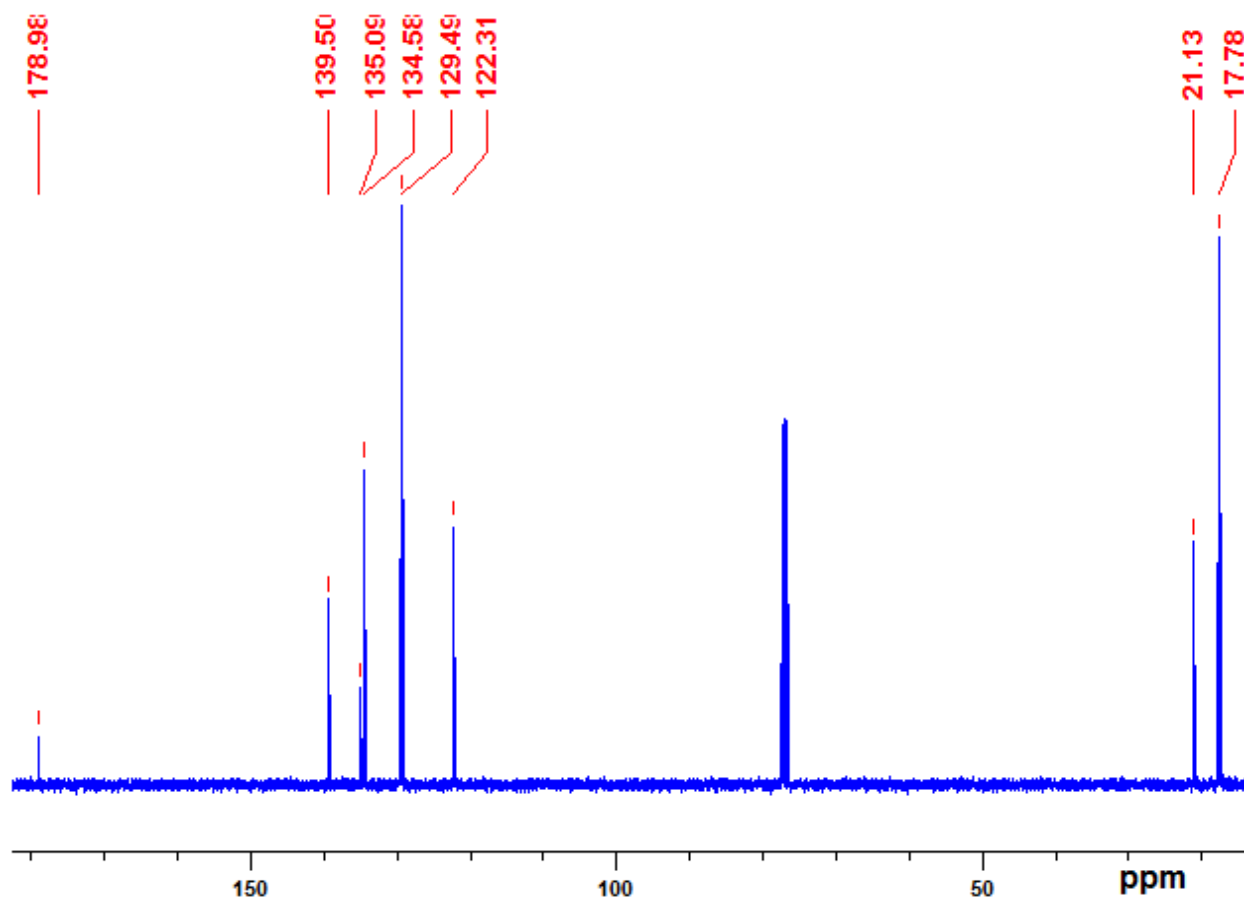**Fig. S21.**  $^{13}\text{C}$  NMR spectrum of  $[(\text{IMes})\text{CuCl}]$  (**6**) in  $\text{CDCl}_3$  at room temperature.

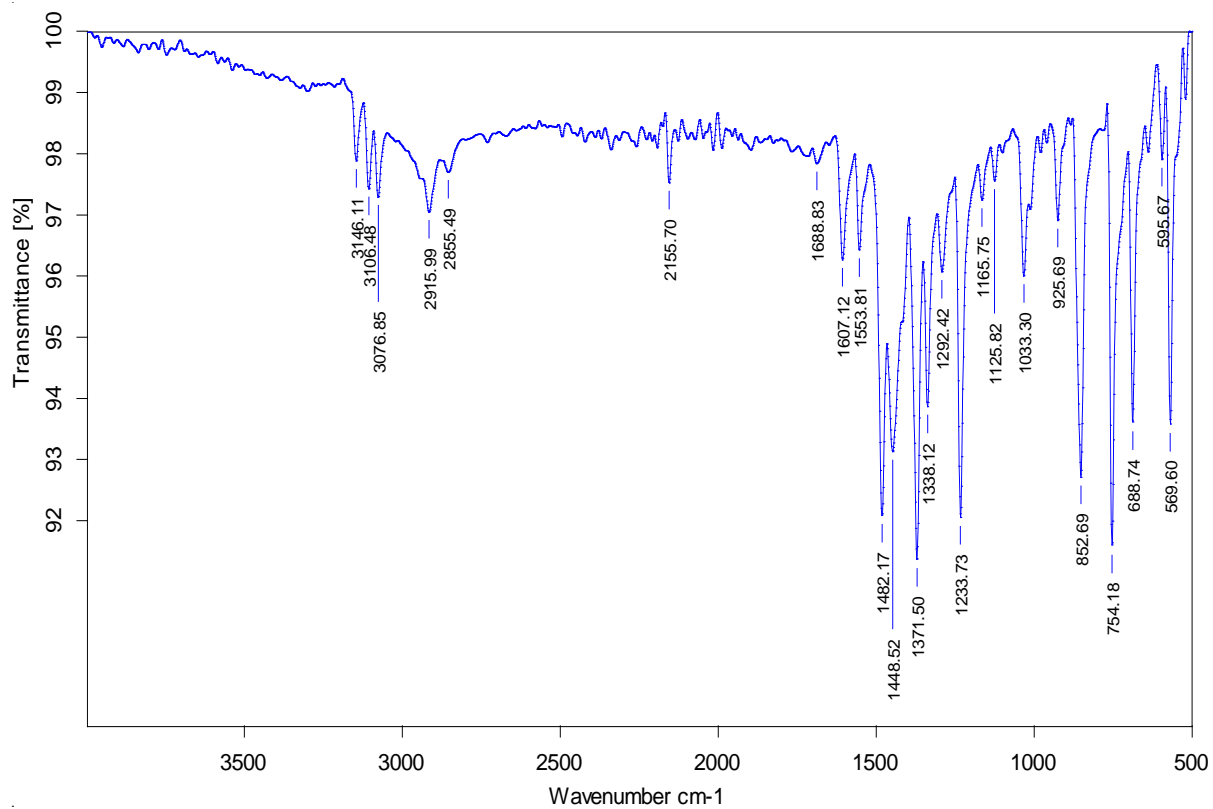

**Fig. S22.** Neat FT-IR spectrum of [(IMes=Se)<sub>2</sub>Cu][CuCl<sub>2</sub>] (7) at room temperature.

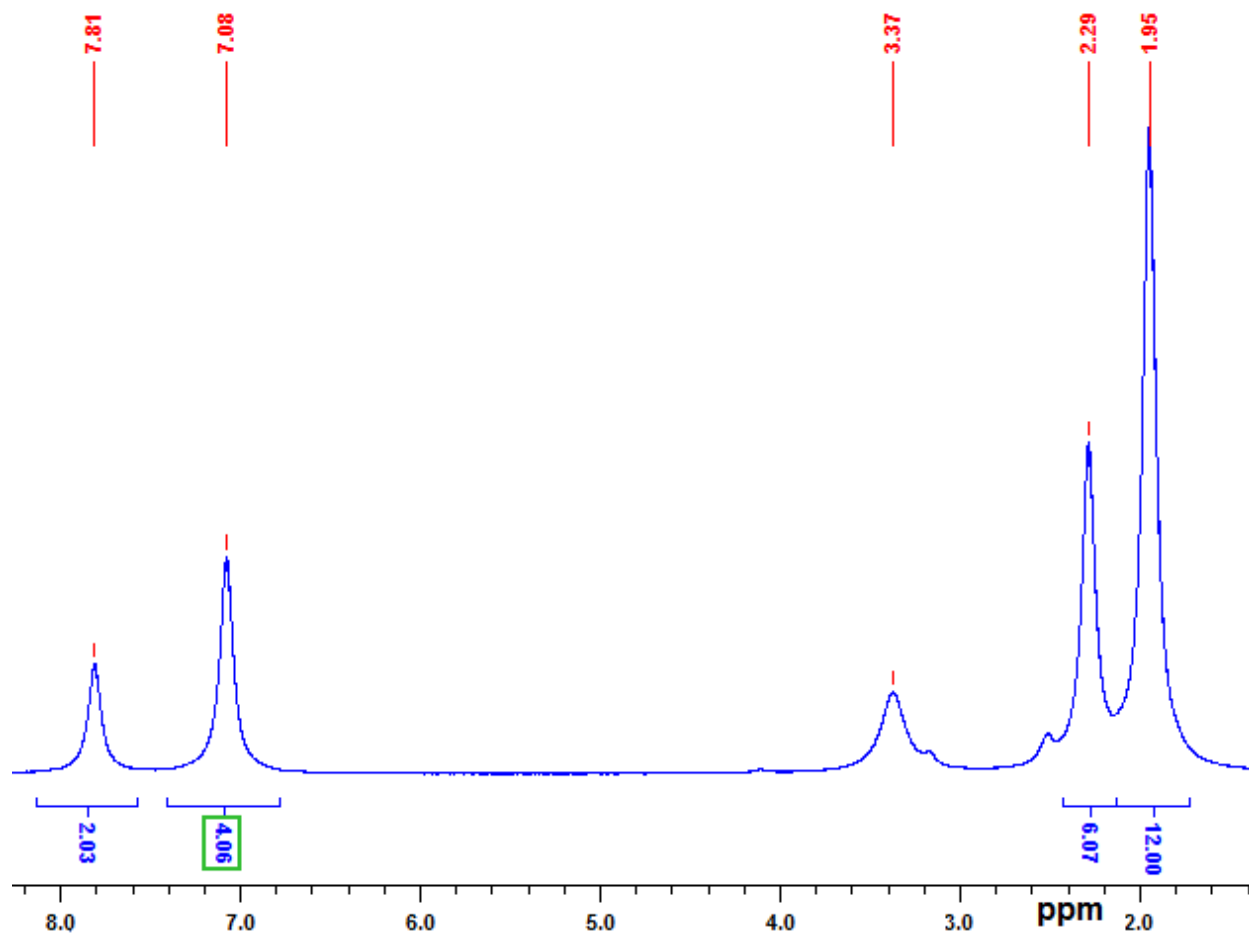

**Fig. S23.**  $^1\text{H}$  NMR spectrum of  $[(\text{IMes}=\text{Se})_2\text{Cu}][\text{CuCl}_2]$  (7) in  $\text{DMSO-}d_6$  at room temperature.

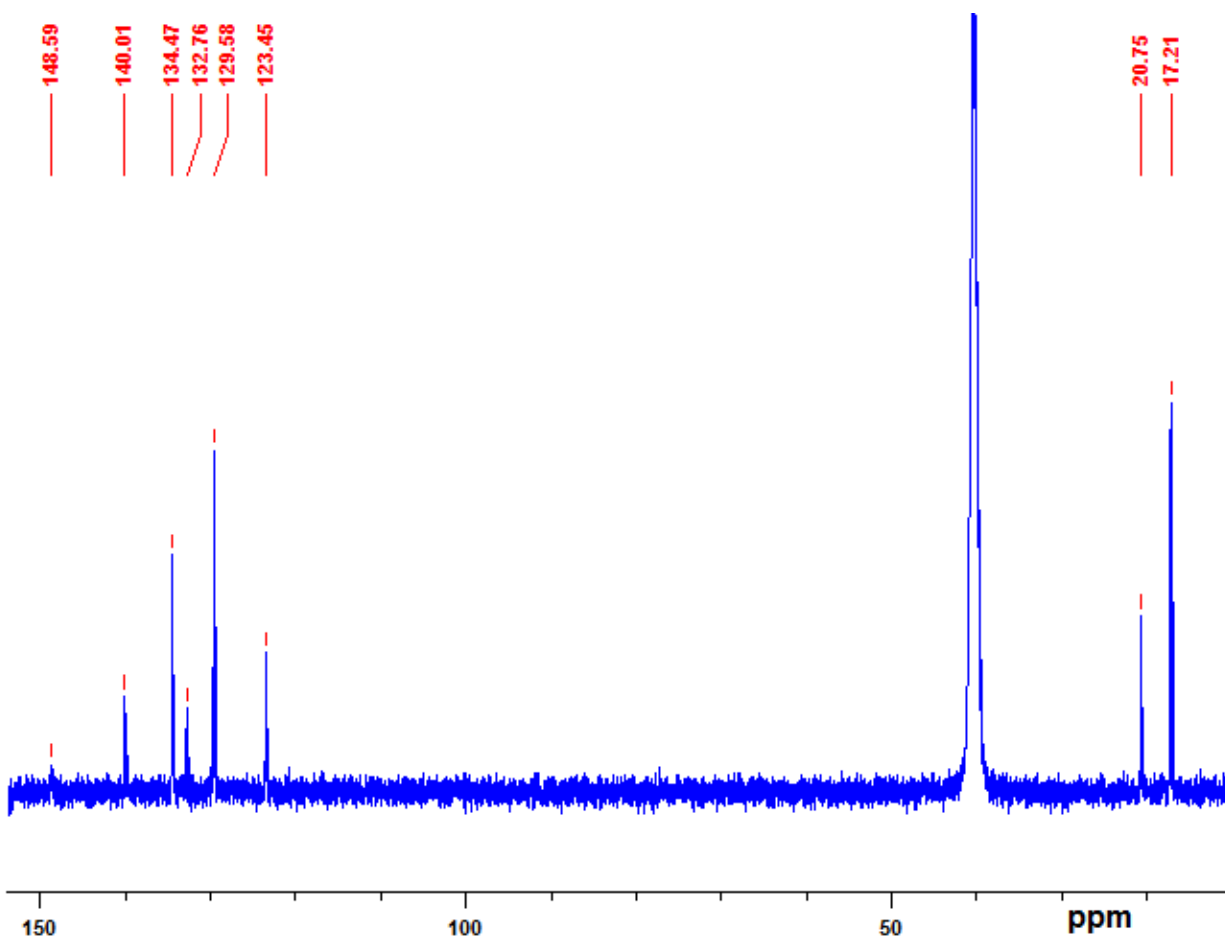

**Fig. S24.**  $^{13}\text{C}$  NMR spectrum of  $[(\text{IMes}=\text{Se})_2\text{Cu}][\text{CuCl}_2]$  (7) in  $\text{DMSO-}d_6$  at room temperature.



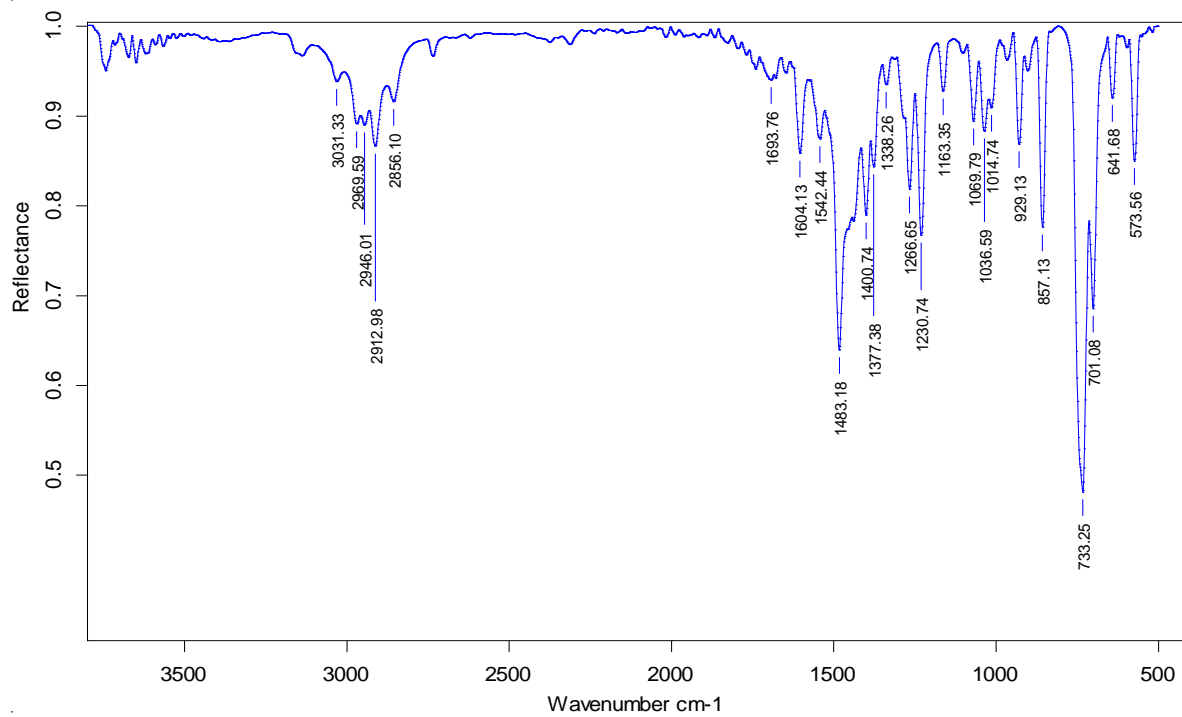

Fig. S25. Neat FT-IR spectrum of [(IMes)<sub>2</sub>Cu][Cl] (**8**) at room temperature.

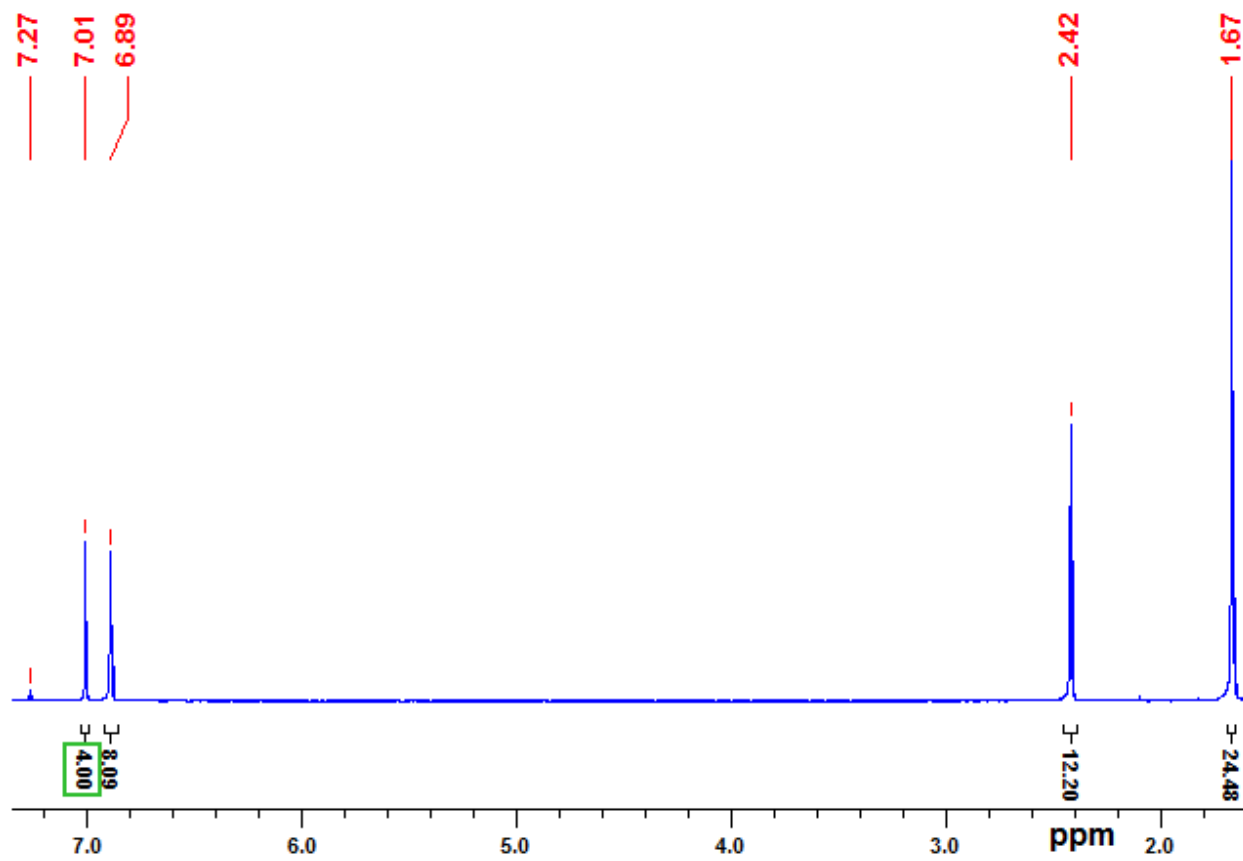

**Fig. S26.**  $^1\text{H}$  NMR spectrum of  $[(\text{IMes})_2\text{Cu}][\text{Cl}]$  (**8**) in  $\text{CDCl}_3$  at room temperature.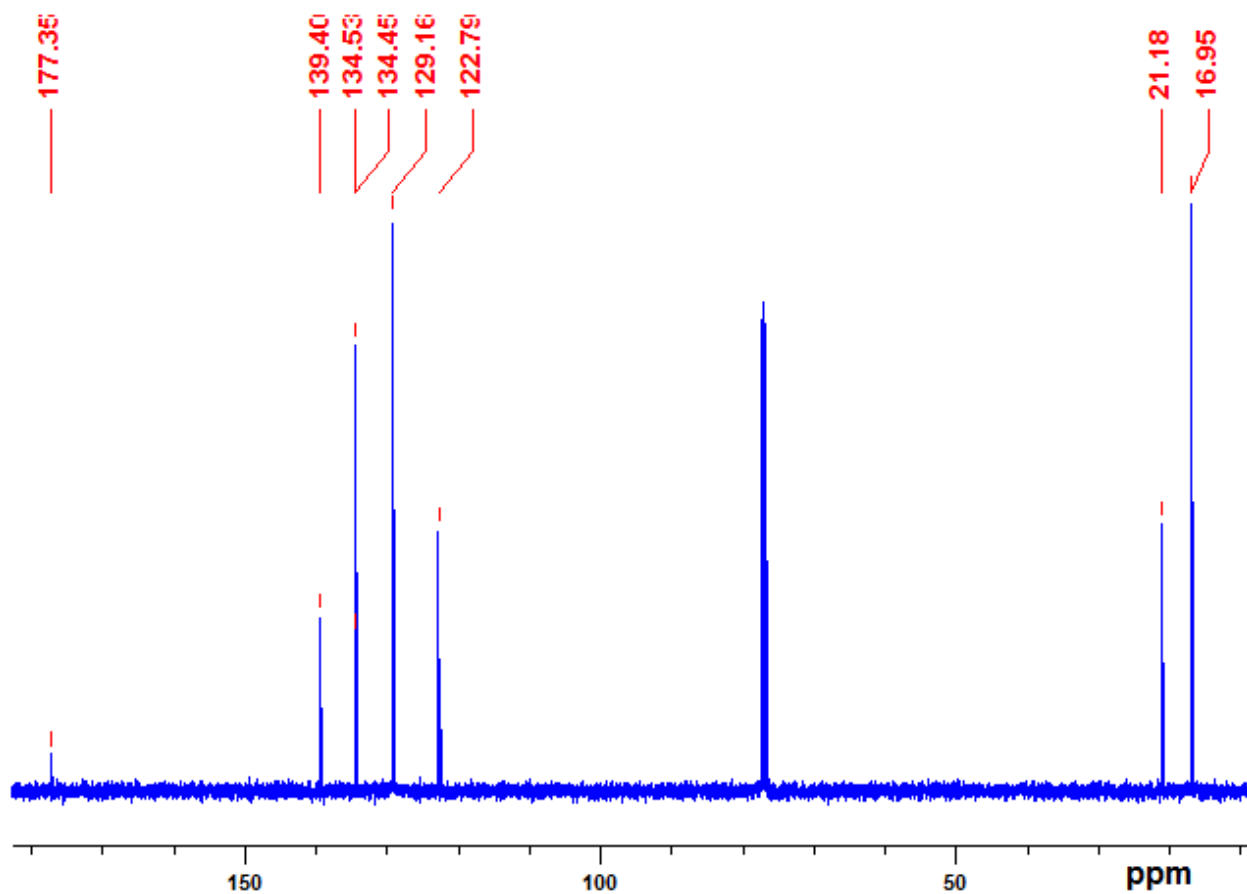**Fig. S27.**  $^{13}\text{C}$  NMR spectrum of  $[(\text{IMes})_2\text{Cu}][\text{Cl}]$  (**8**) in  $\text{CDCl}_3$  at room temperature.

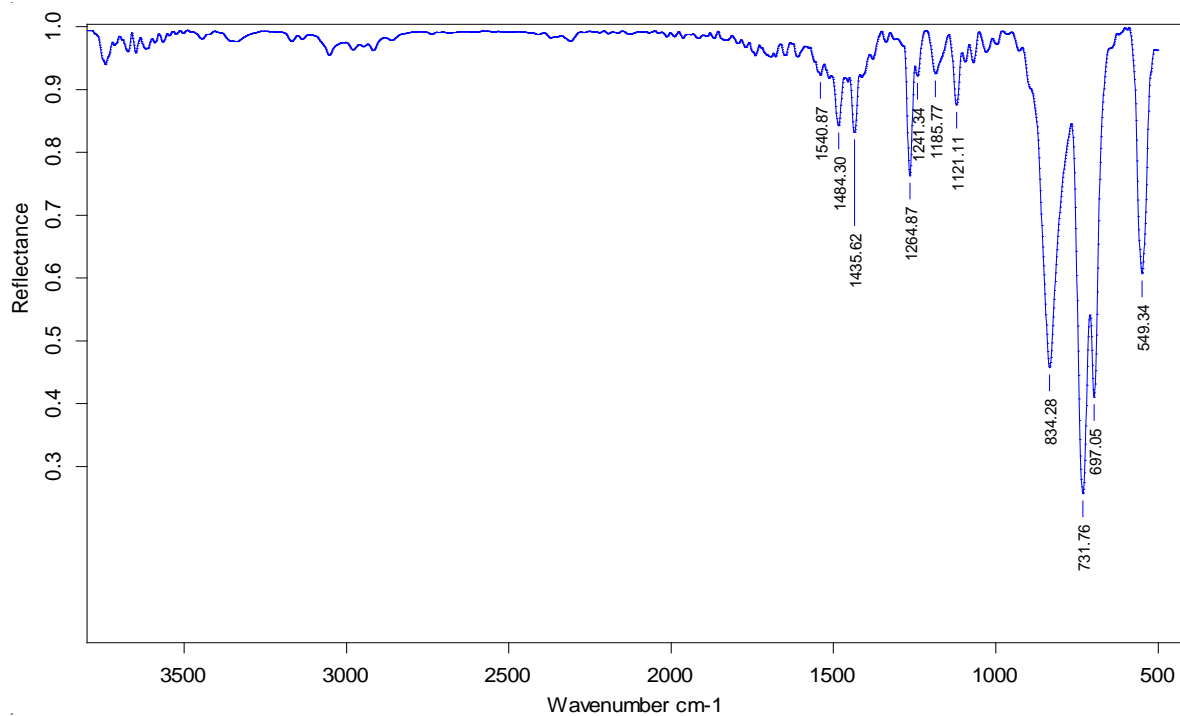

**Fig. S28.** Neat FT-IR spectrum of [(IMes=Se)<sub>2</sub>Cu][PF<sub>6</sub>] (9) at room temperature.

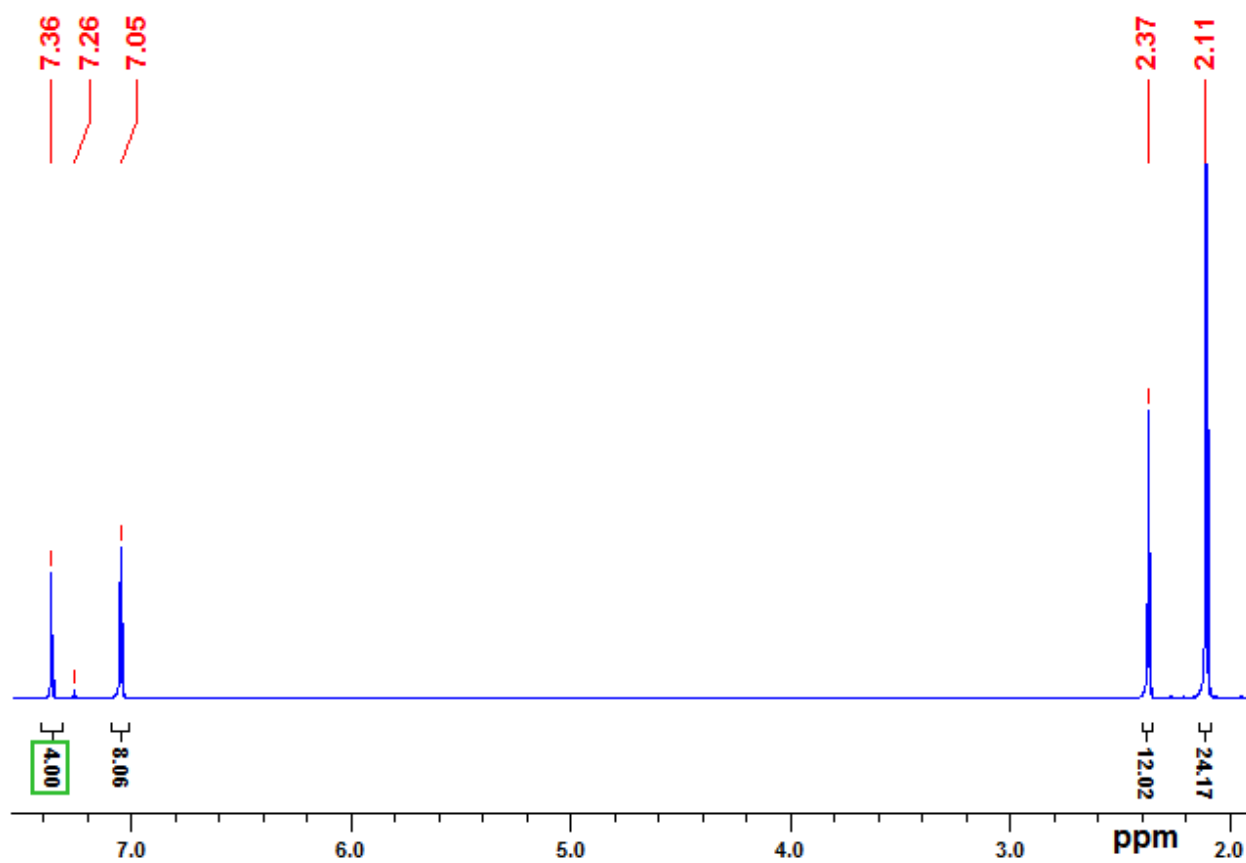

**Fig. S29.**  $^1\text{H}$  NMR spectrum of  $[(\text{IMes}=\text{Se})_2\text{Cu}][\text{PF}_6]$  (**9**) in  $\text{CDCl}_3$  at room temperature.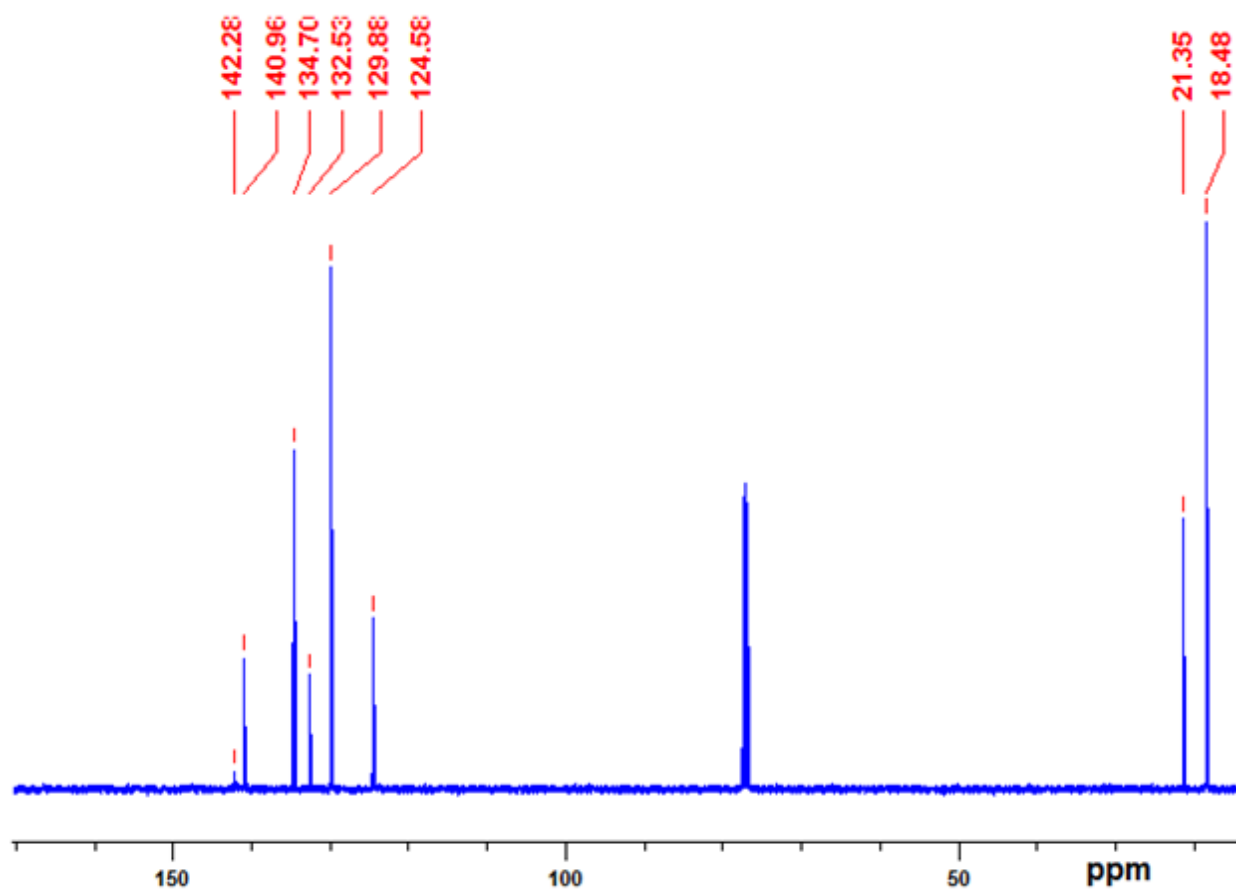**Fig. S30.**  $^{13}\text{C}$  NMR spectrum of  $[(\text{IMes}=\text{Se})_2\text{Cu}][\text{PF}_6]$  (**9**) in  $\text{CDCl}_3$  at room temperature.

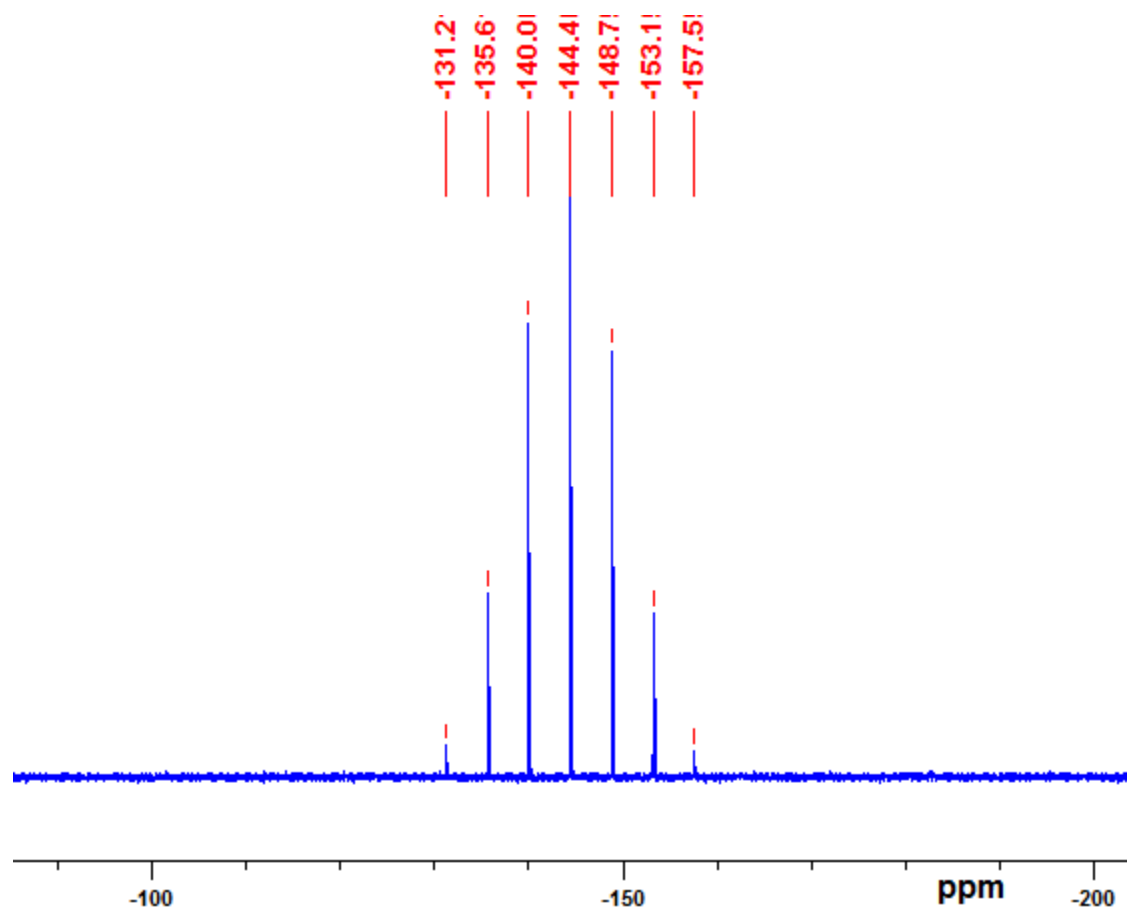

**Fig. S31.**  $^{31}\text{P}$  NMR spectrum of  $[(\text{IMes}=\text{Se})_2\text{Cu}][\text{PF}_6]$  (**9**) in  $\text{CDCl}_3$  at room temperature.

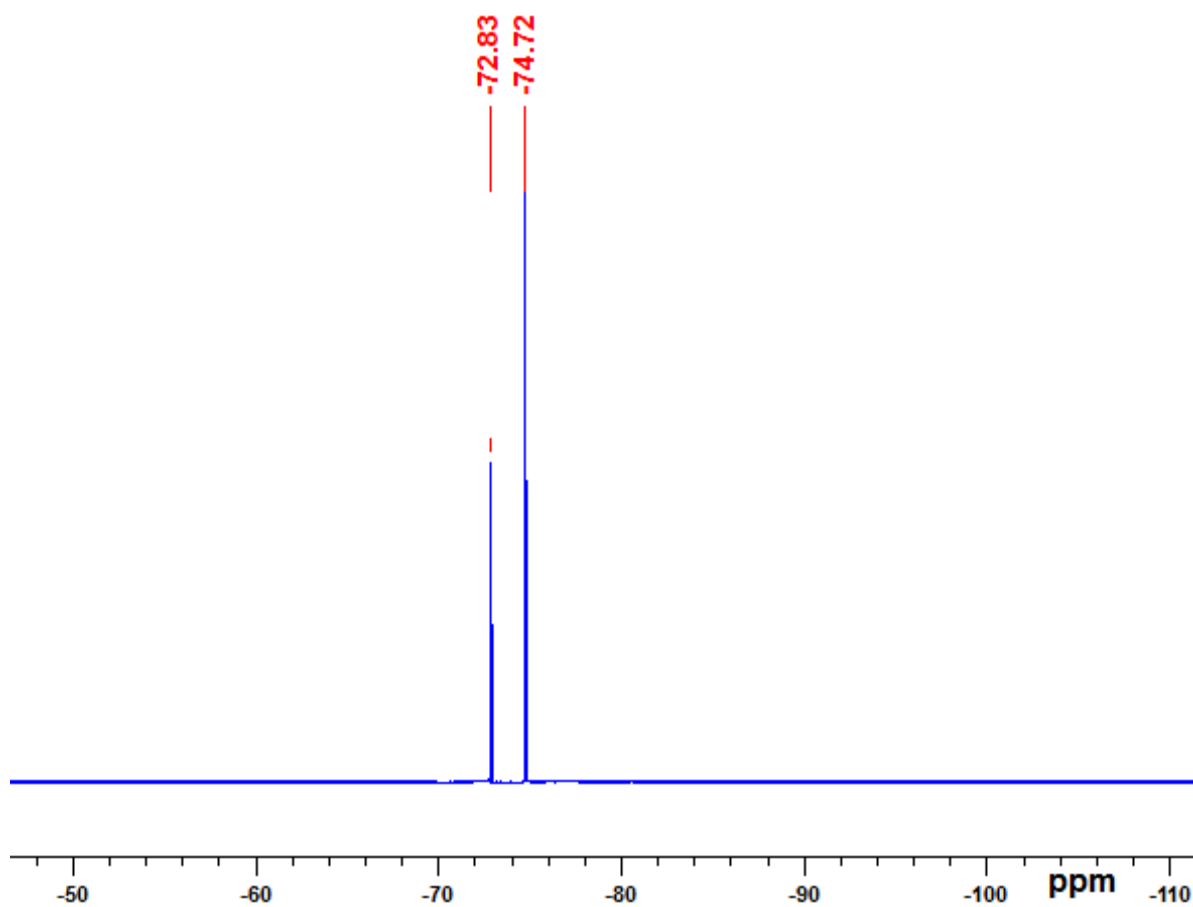

**Fig. S32.**  $^{19}\text{F}$  NMR spectrum of  $[(\text{IMes}=\text{Se})_2\text{Cu}][\text{PF}_6]$  (**9**) in  $\text{CDCl}_3$  at room temperature.

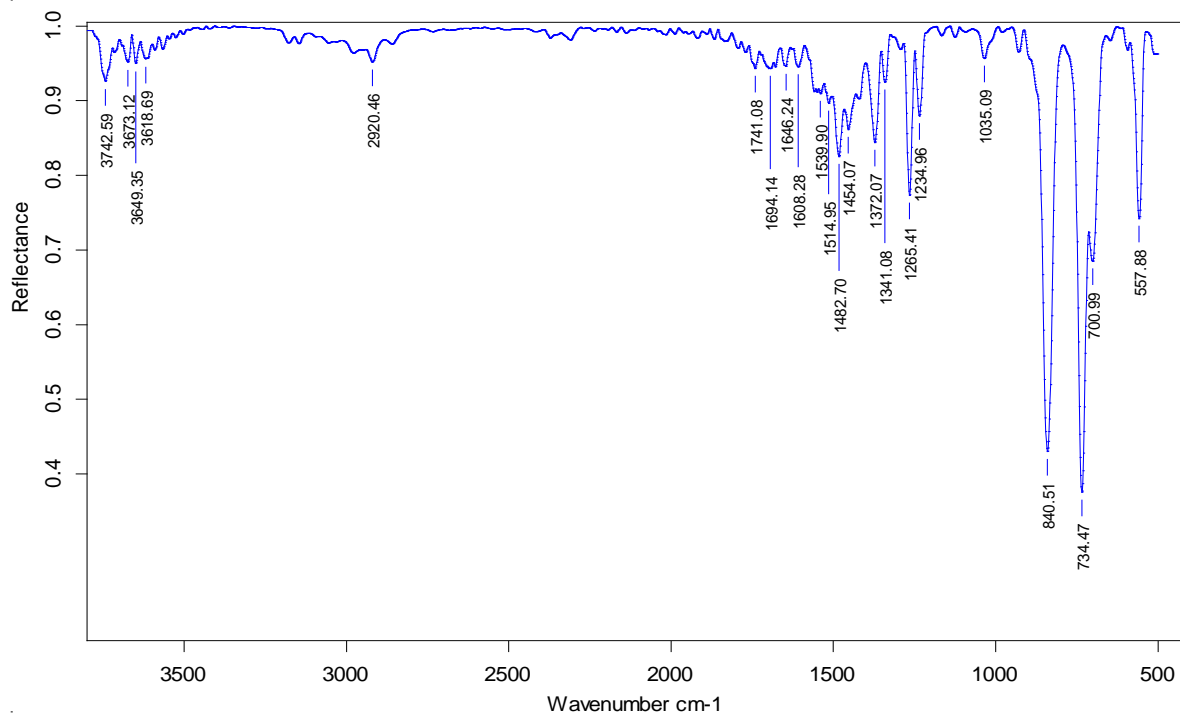

Fig. S33. Neat FT-IR spectrum of [(IMes)<sub>2</sub>Cu][PF<sub>6</sub>] (10) at room temperature.

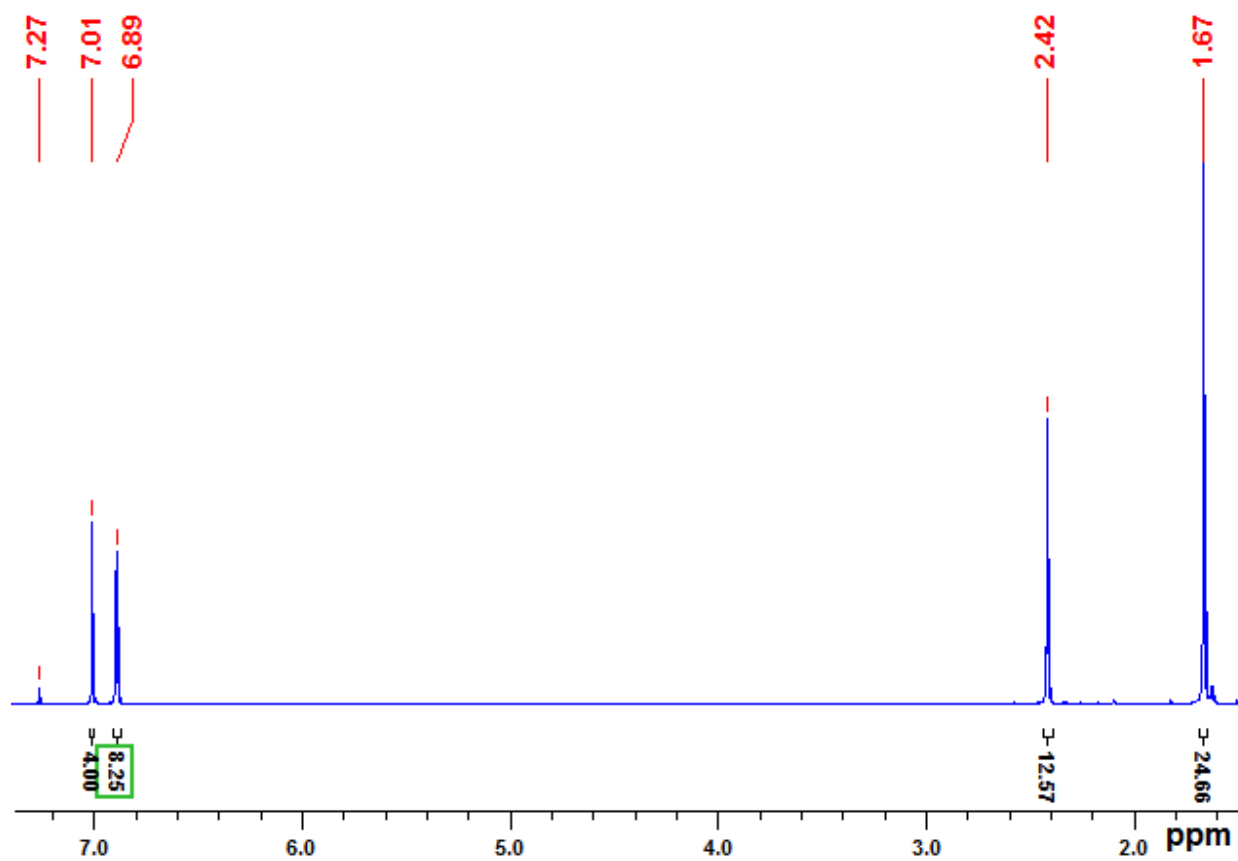

Fig. S34.  $^1\text{H}$  NMR spectrum of  $[(\text{IMes})_2\text{Cu}][\text{PF}_6]$  (**10**) in  $\text{CDCl}_3$  at room temperature.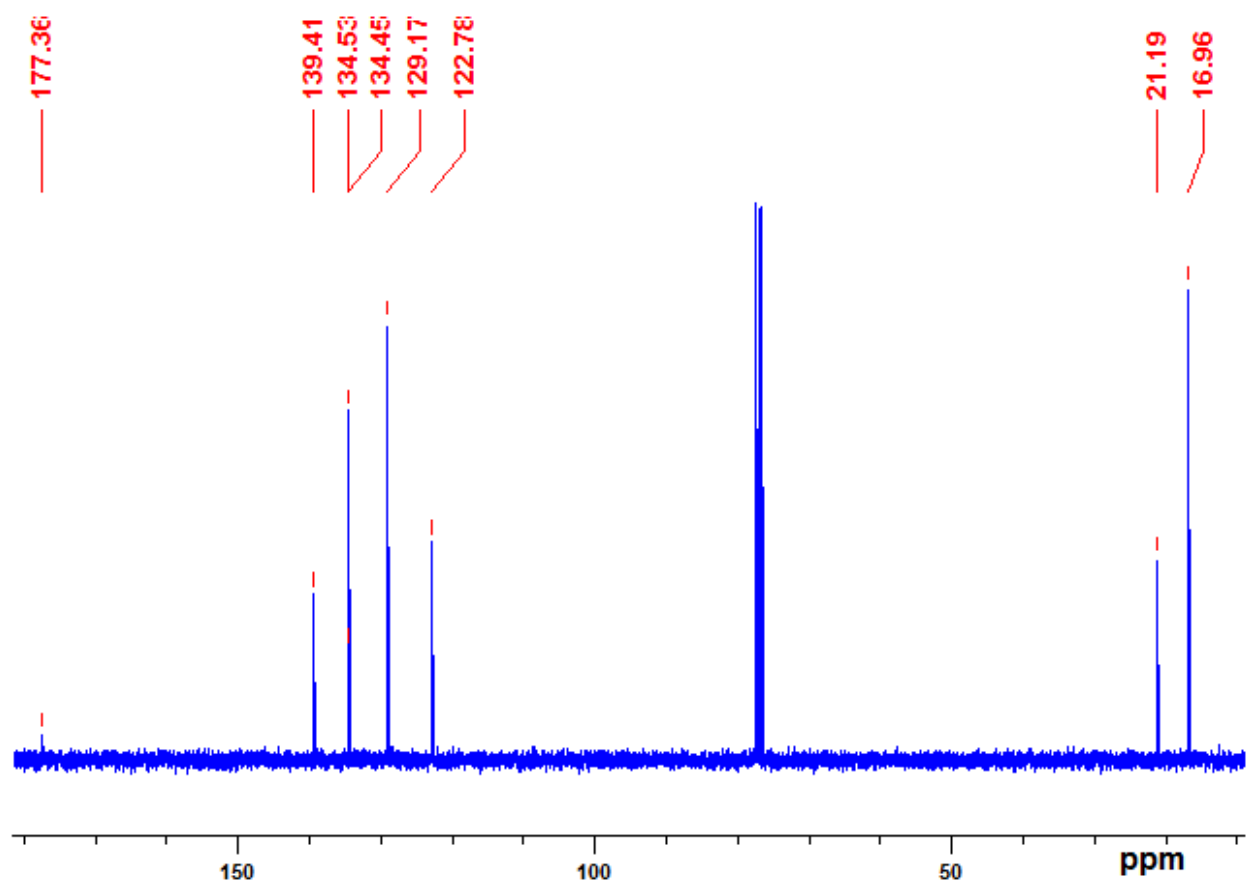



**Fig. S35.**  $^{13}\text{C}$  NMR spectrum of  $[(\text{IMes})_2\text{Cu}][\text{PF}_6]$  (**10**) in  $\text{CDCl}_3$  at room temperature.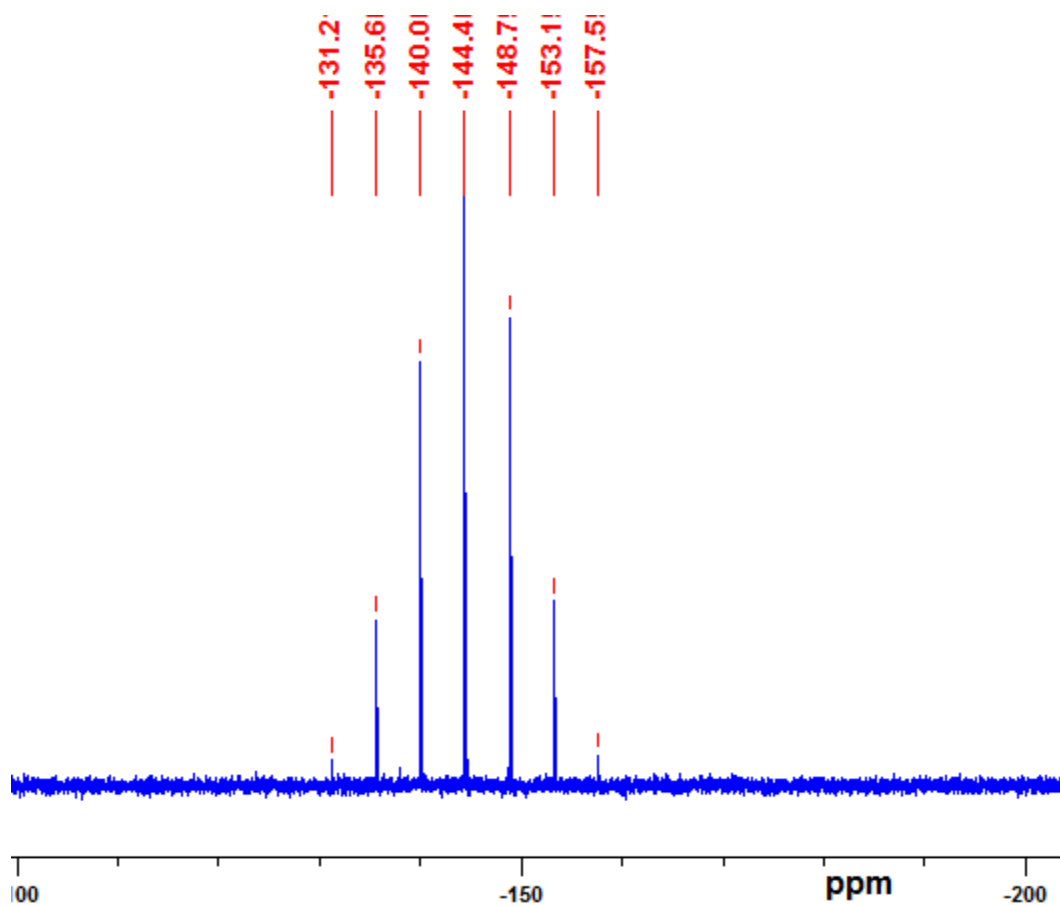**Fig. S36.**  $^{31}\text{P}$  NMR spectrum of  $[(\text{IMes})_2\text{Cu}][\text{PF}_6]$  (**10**) in  $\text{CDCl}_3$  at room temperature.

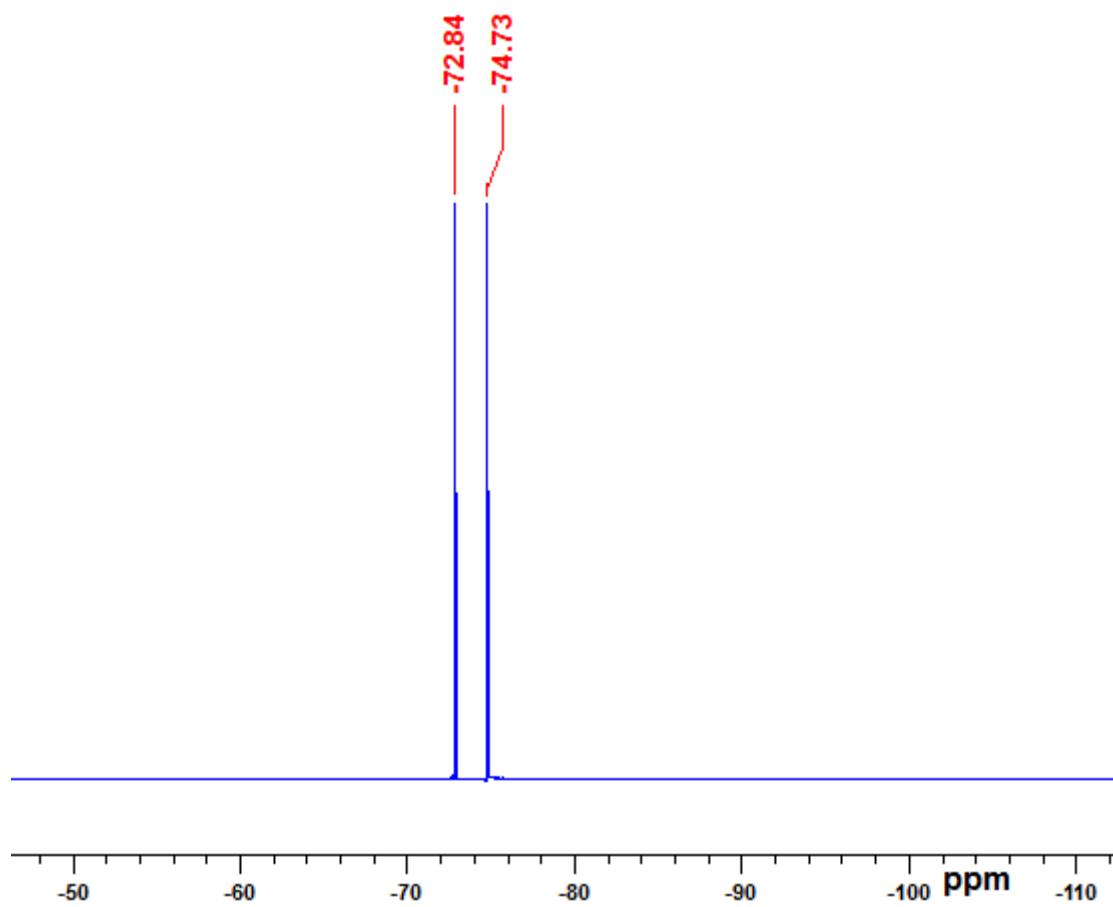

**Fig. S37.**  $^{19}\text{F}$  NMR spectrum of  $[(\text{IMes})_2\text{Cu}][\text{PF}_6]$  (**10**) in  $\text{CDCl}_3$  at room temperature.

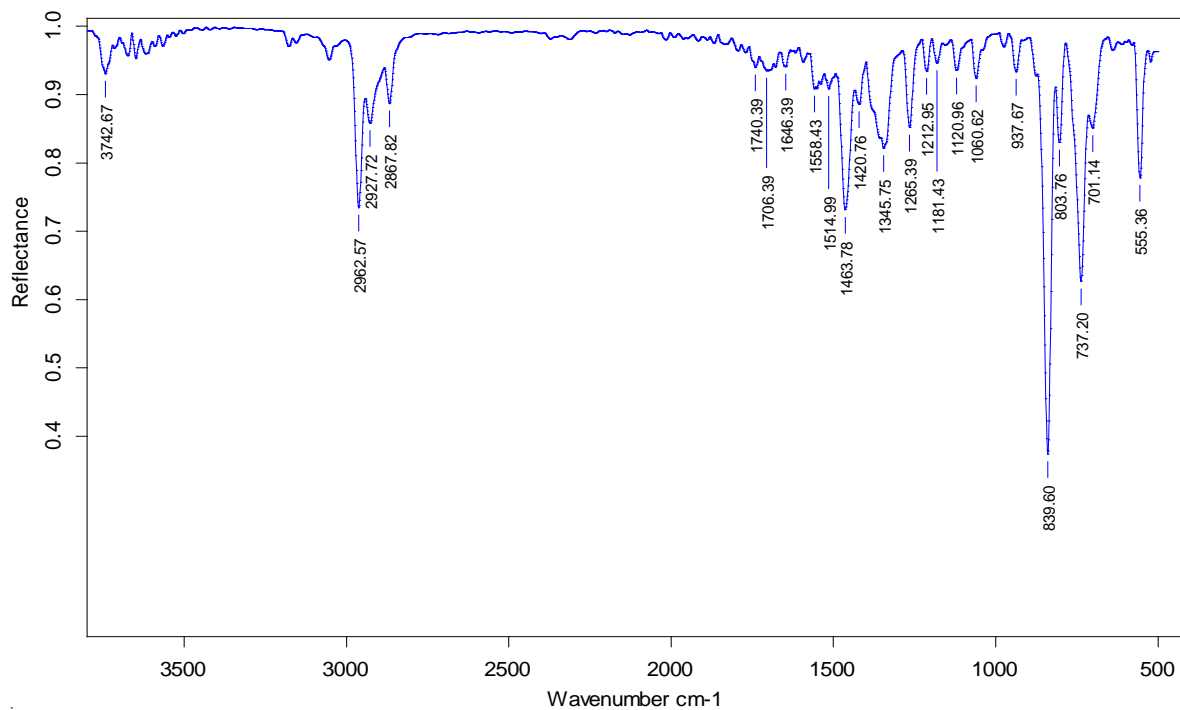

Fig. S38. Neat FT-IR spectrum of [(IPr=Se)<sub>2</sub>Cu][PF<sub>6</sub>] (11) at room temperature.

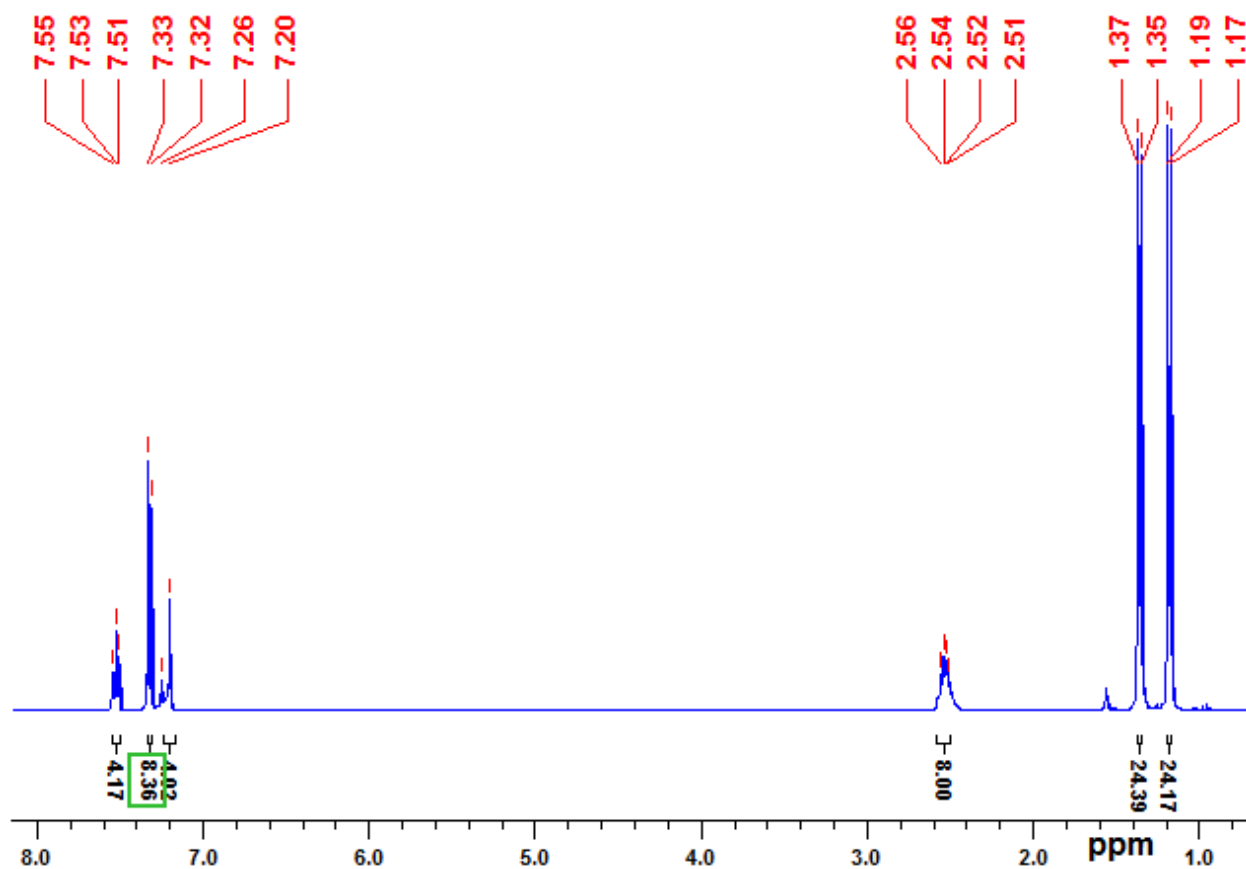

**Fig. S39.**  $^1\text{H}$  NMR spectrum of  $[(\text{IPr}=\text{Se})_2\text{Cu}][\text{PF}_6]$  (**11**) in  $\text{CDCl}_3$  at room temperature.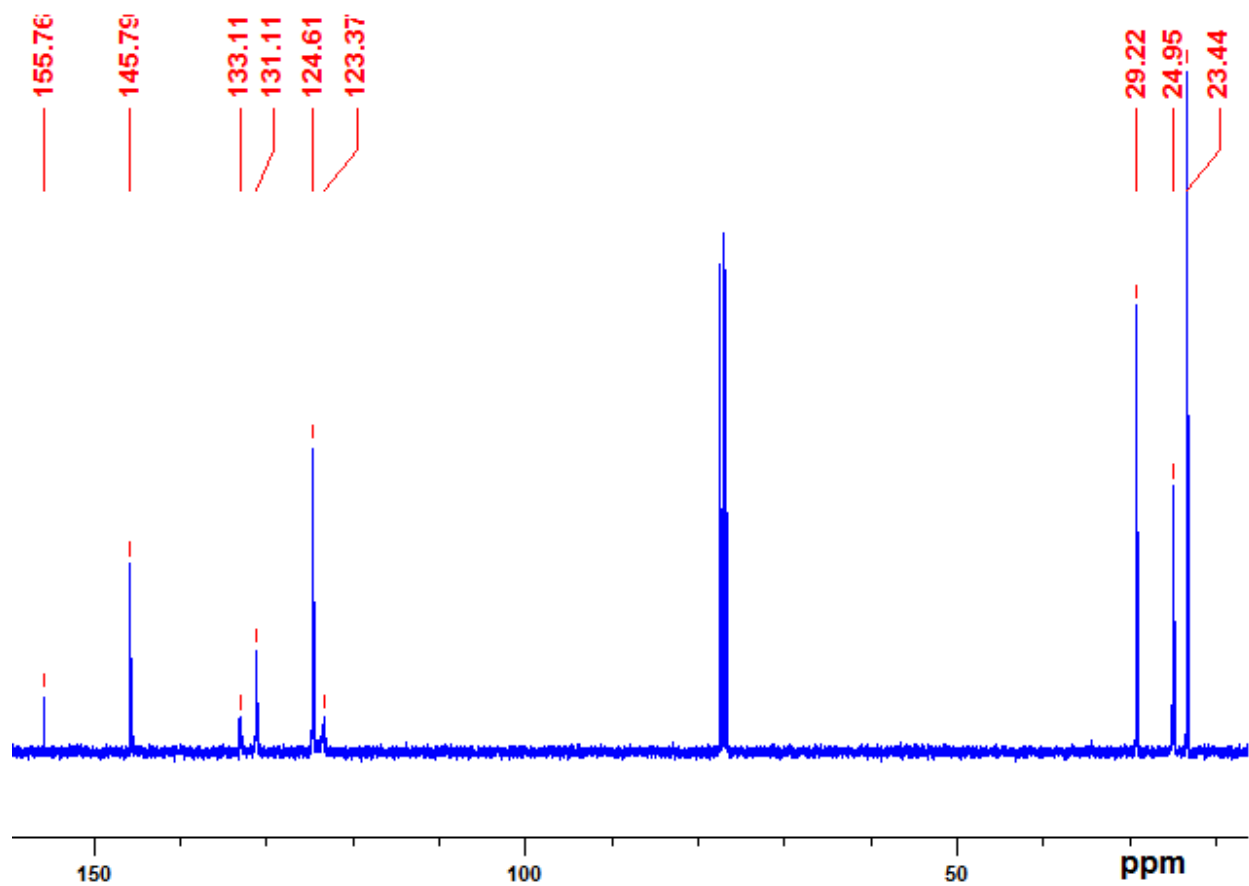**Fig. S40.**  $^{13}\text{C}$  NMR spectrum of  $[(\text{IPr}=\text{Se})_2\text{Cu}][\text{PF}_6]$  (**11**) in  $\text{CDCl}_3$  at room temperature.

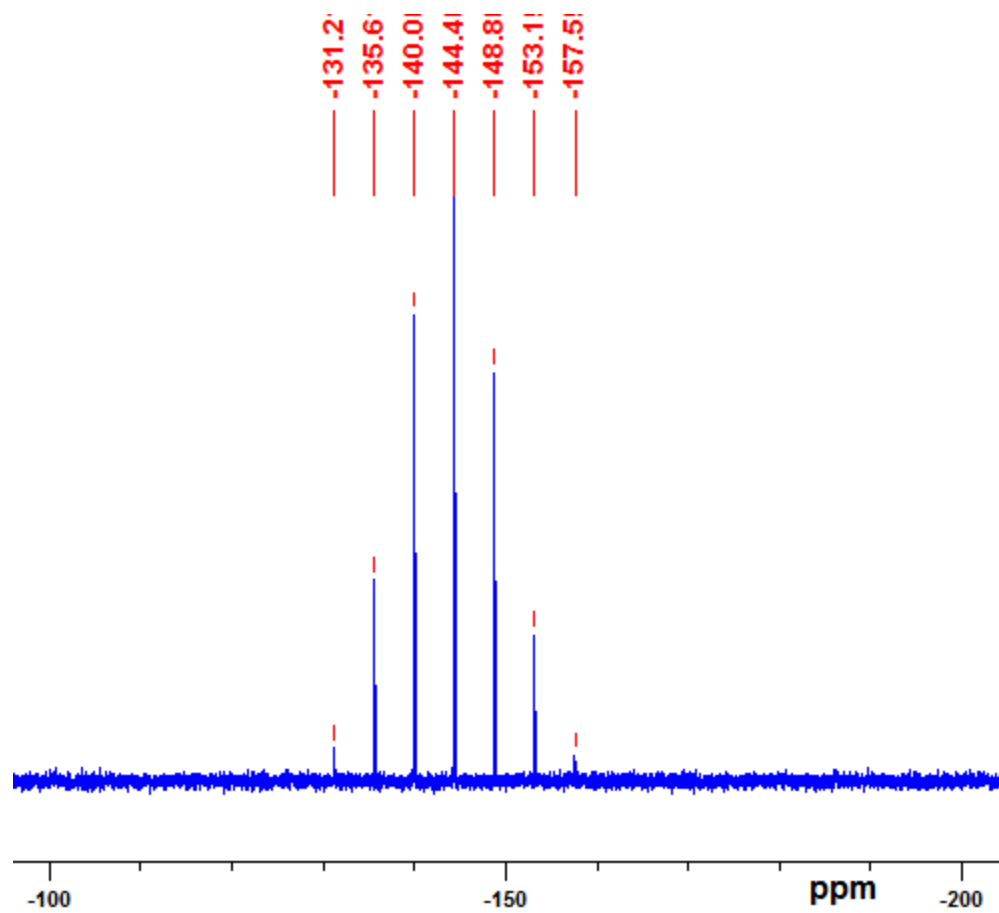

**Fig. S41.**  $^{31}\text{P}$  NMR spectrum of  $[(\text{IPr}=\text{Se})_2\text{Cu}][\text{PF}_6]$  (**11**) in  $\text{CDCl}_3$  at room temperature.

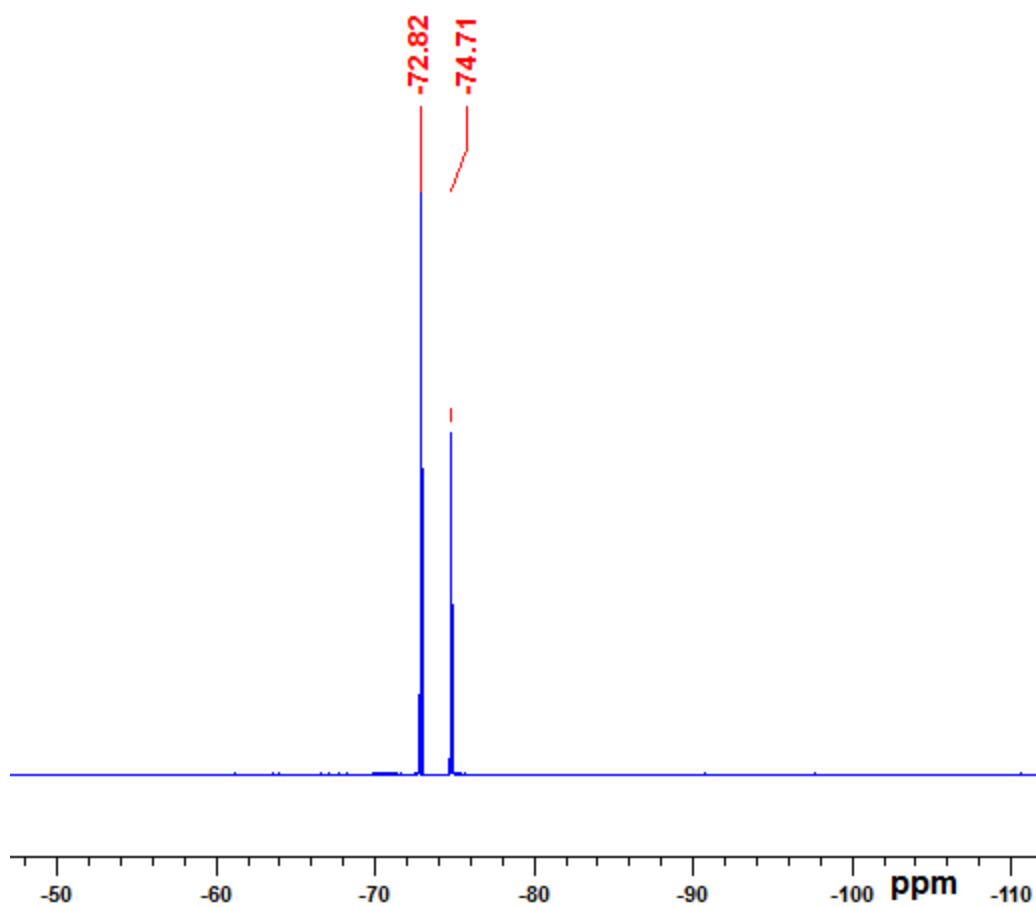

**Fig. S42.**  $^{19}\text{F}$  NMR spectrum of  $[(\text{IPr}=\text{Se})_2\text{Cu}][\text{PF}_6]$  (**11**) in  $\text{CDCl}_3$  at room temperature.

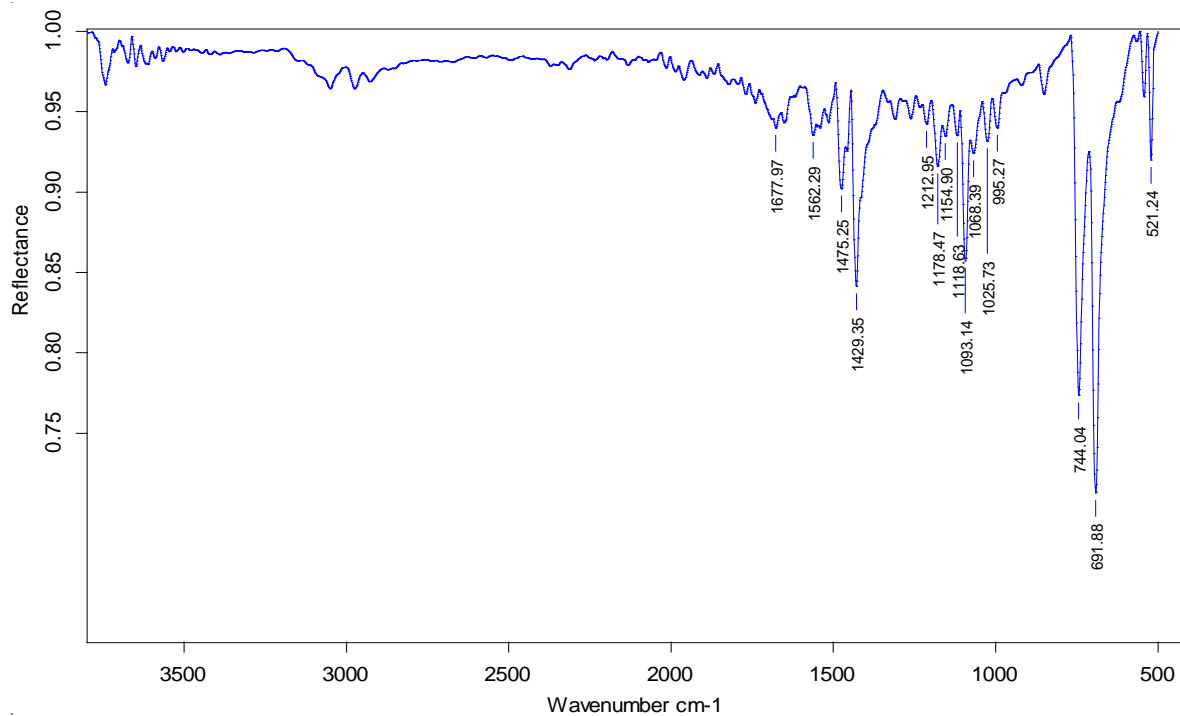

**Fig. S43.** Neat FT-IR spectrum of  $[(PPh_3)_4Cu_4I_4]$  (12) at room temperature.

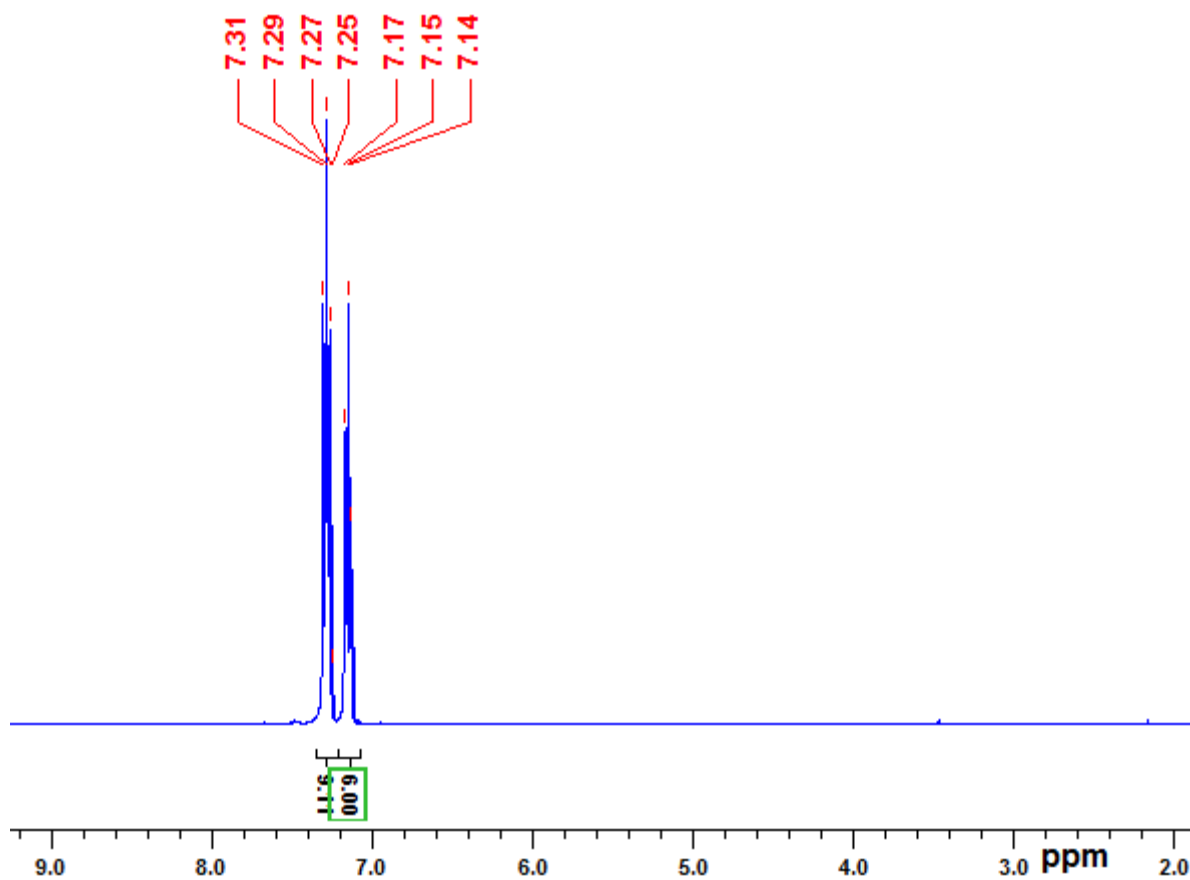

**Fig. S44.**  $^1\text{H}$  NMR spectrum of  $[(\text{PPh}_3)_4\text{Cu}_4\text{I}_4]$  (**12**) in  $\text{CDCl}_3$  at room temperature.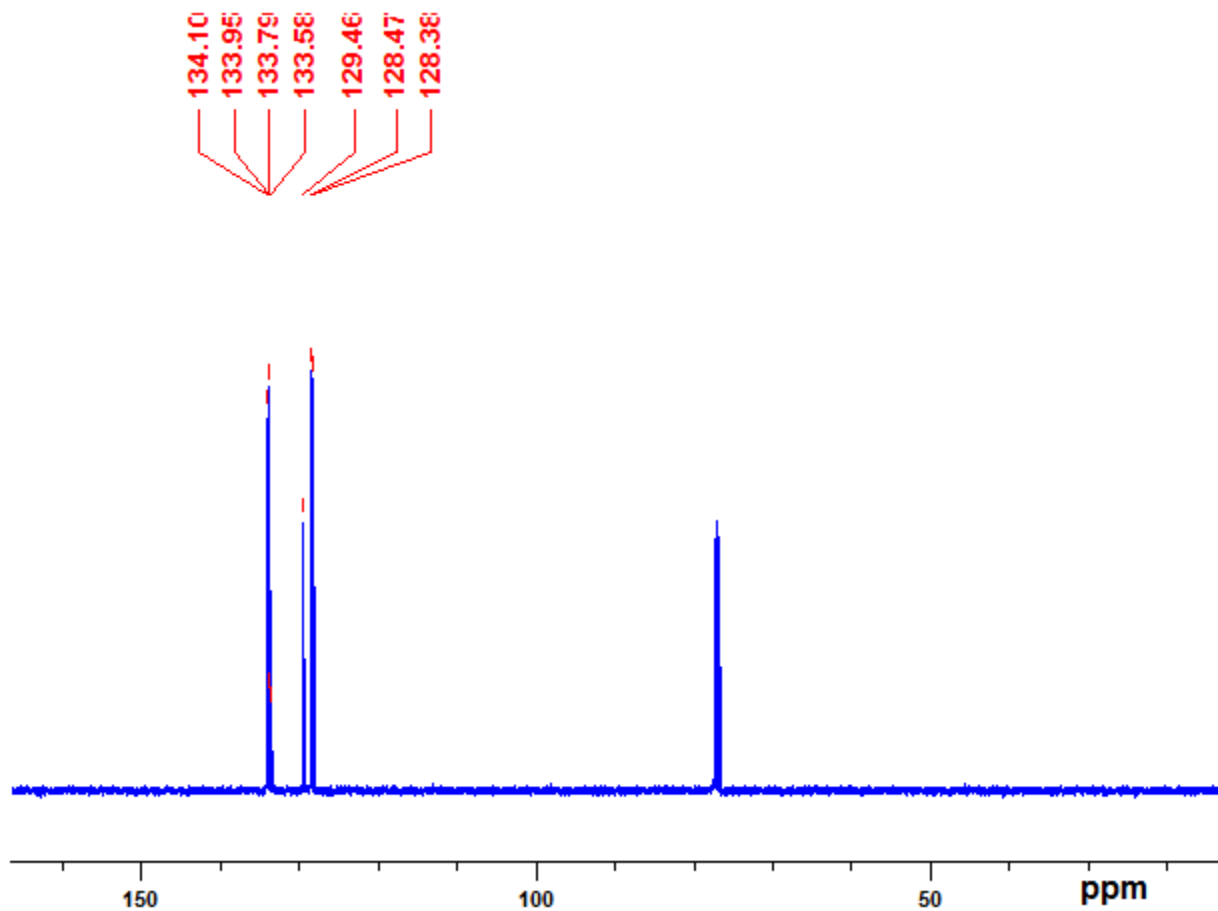**Fig. S45.**  $^{13}\text{C}$  NMR spectrum of  $[(\text{PPh}_3)_4\text{Cu}_4\text{I}_4]$  (**12**) in  $\text{CDCl}_3$  at room temperature.



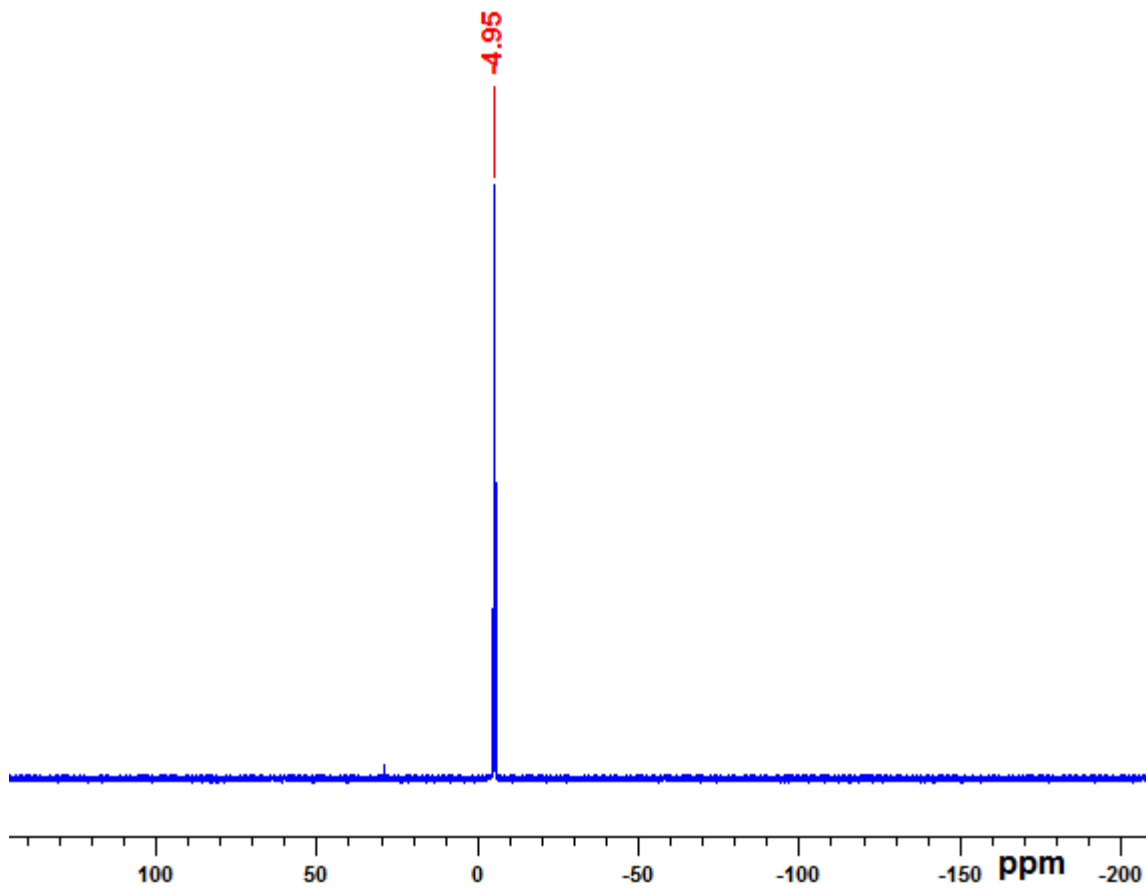

**Fig. 46.**  $^{31}\text{P}$  NMR spectrum of  $[(\text{PPh}_3)_4\text{Cu}_4\text{I}_4]$  (**12**) in  $\text{CDCl}_3$  at room temperature.

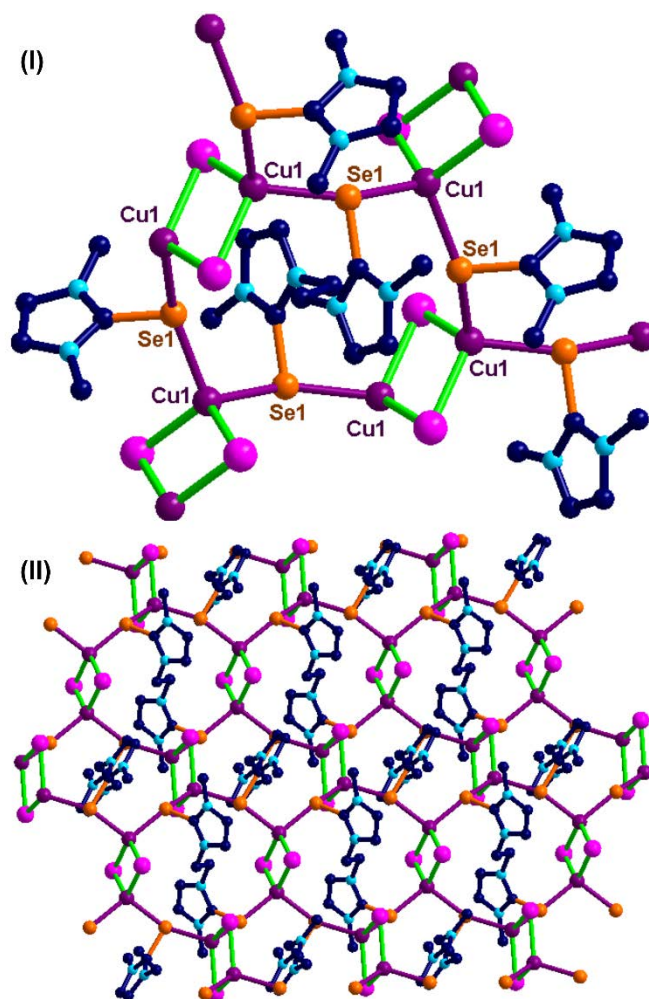

Fig. 47. Packing arrangement of molecule 13.

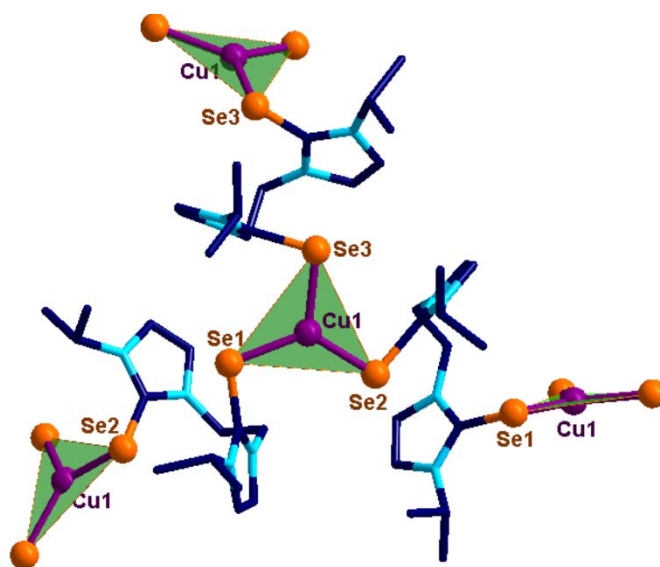

**Fig. 48.** Polyhedron view of molecule **14**.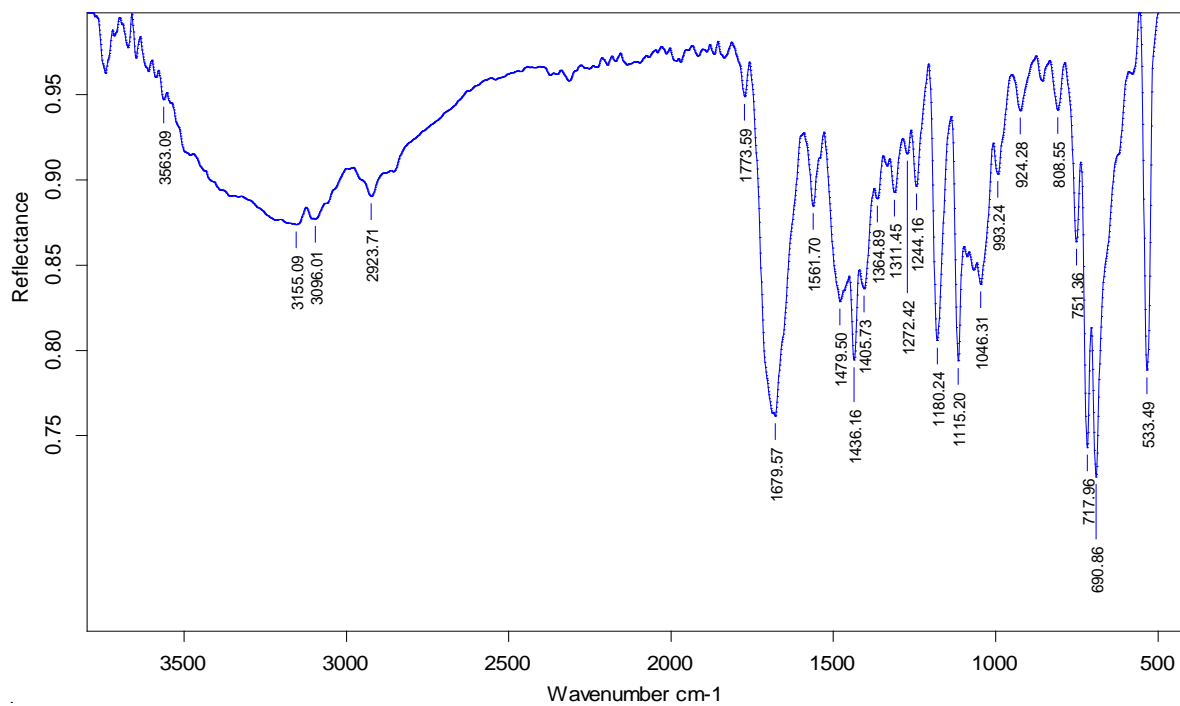**Fig. S49.** Neat FT-IR spectrum of [(Ebis)CuI]<sub>n</sub> (**13**) at room temperature.

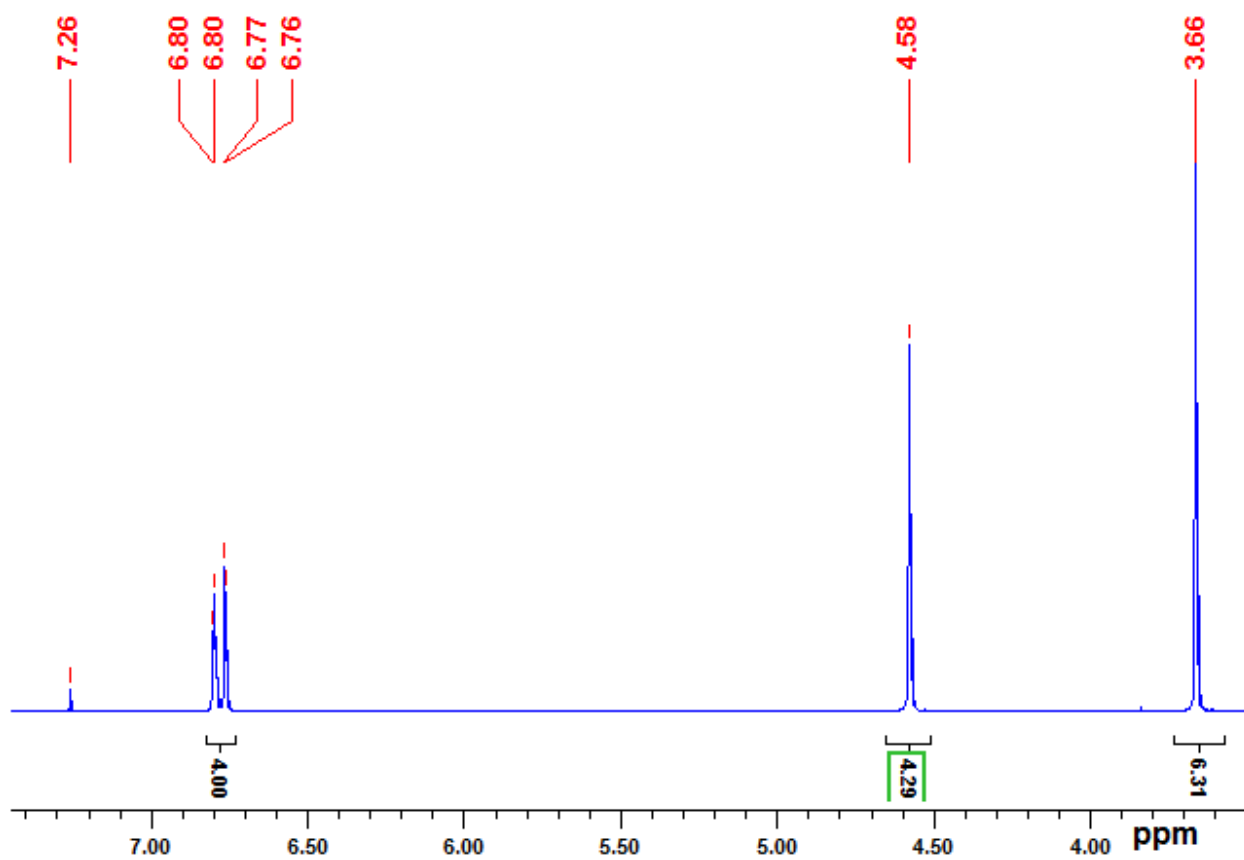

**Fig. S50.** <sup>1</sup>H NMR spectrum of [(Ebis)CuI]<sub>n</sub> (13) in CDCl<sub>3</sub> at room temperature.

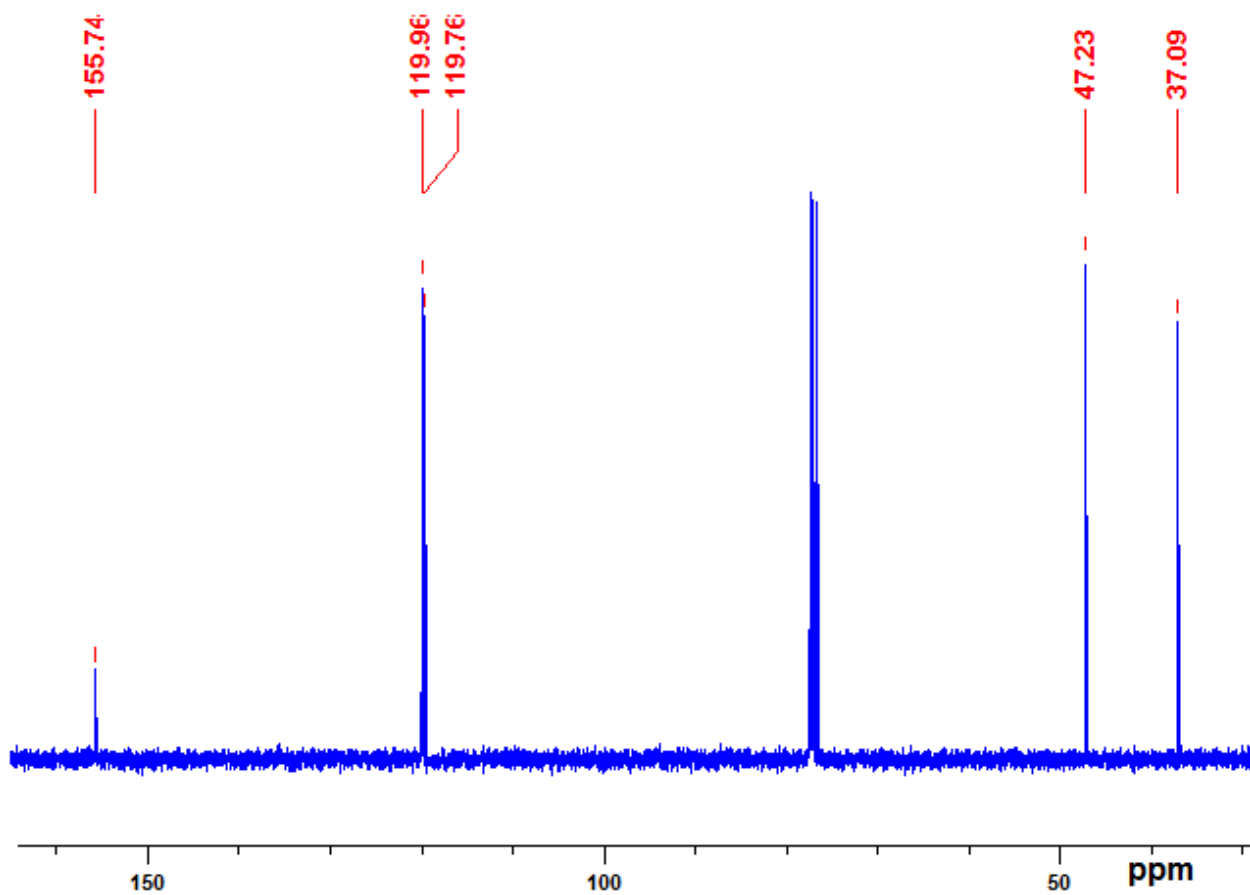

**Fig. S51.** <sup>13</sup>C NMR spectrum of [(Ebis)CuI]<sub>n</sub> (13) in CDCl<sub>3</sub> at room temperature.

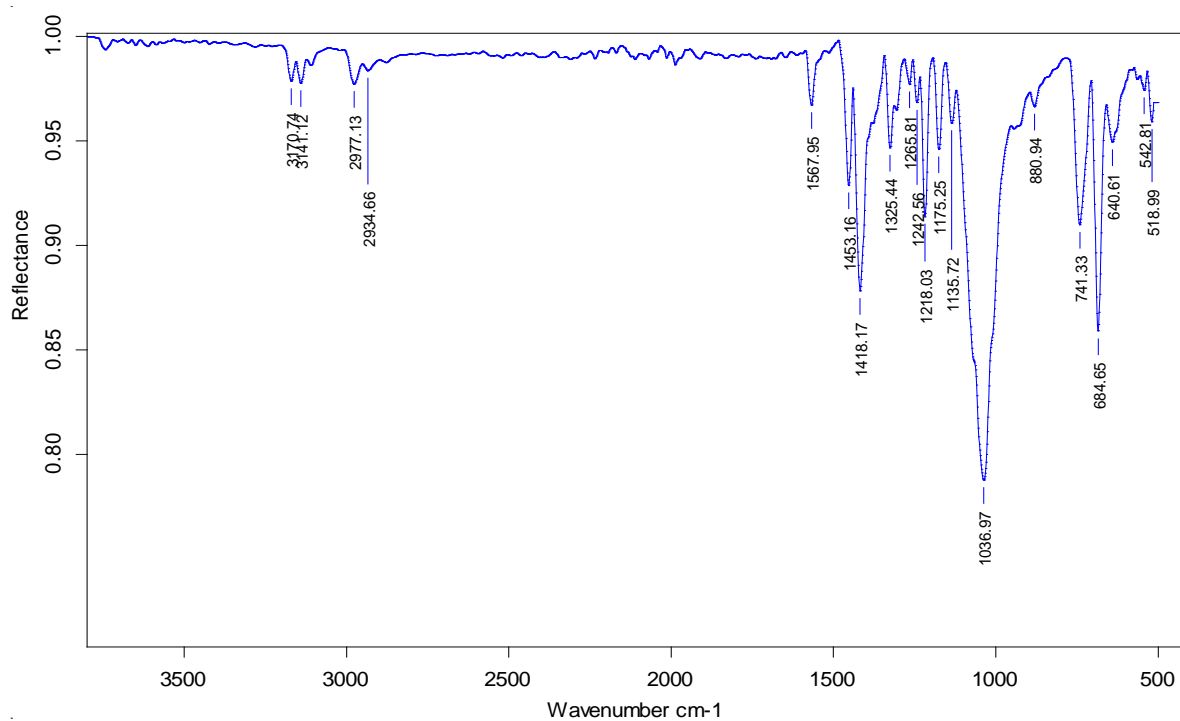

**Fig. S52.** Neat FT-IR spectrum of  $\{[(\text{Ebpis})_{1.5}\text{Cu}][\text{BF}_4]\}_n$  (**14**) at room temperature.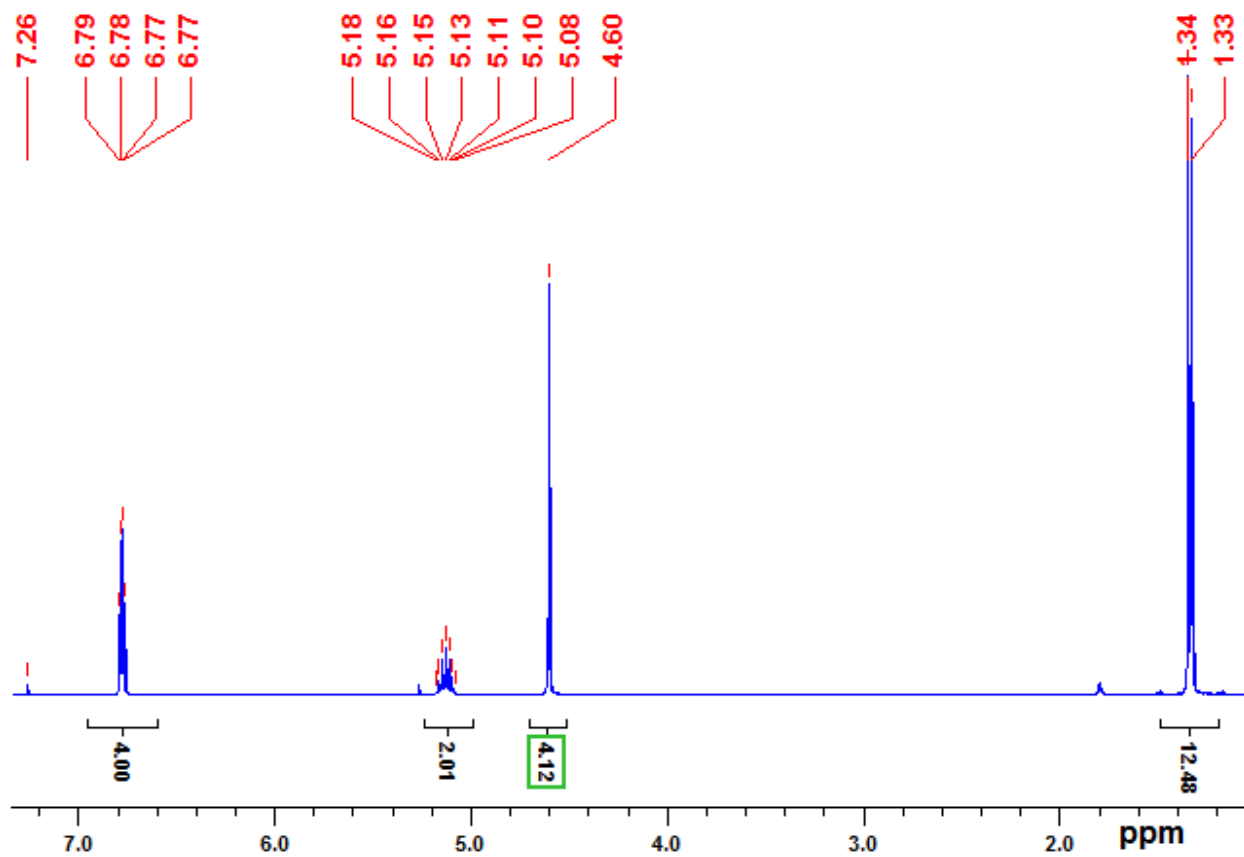**Fig. S53.**  $^1\text{H}$  NMR spectrum of  $\{[(\text{Ebpis})_{1.5}\text{Cu}][\text{BF}_4]\}_n$  (**14**) in  $\text{CDCl}_3$  at room temperature.

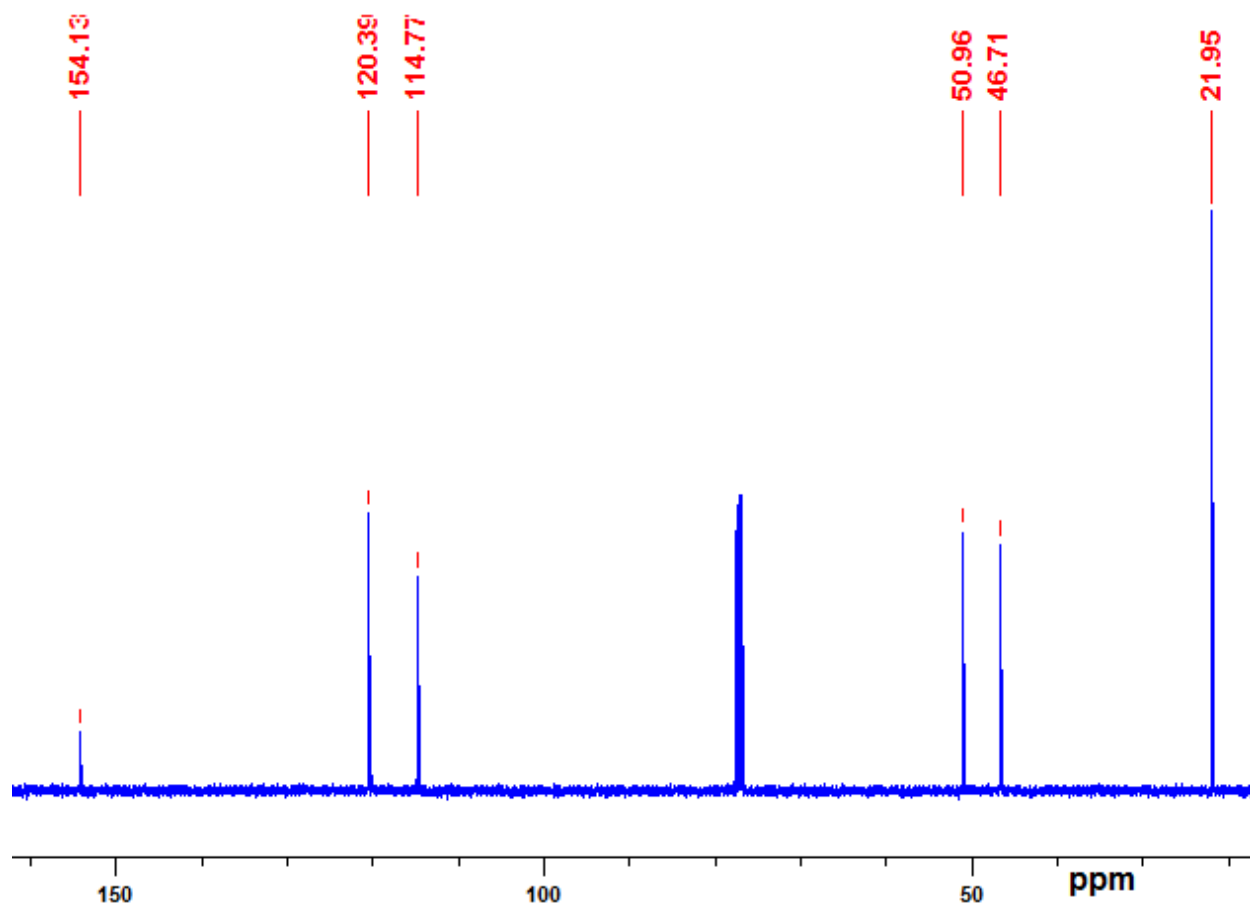

**Fig. S54.**  $^{13}\text{C}$  NMR spectrum of  $\{[(\text{Ebpis})_{1.5}\text{Cu}][\text{BF}_4]\}_n$  (**14**) in  $\text{CDCl}_3$  at room temperature.

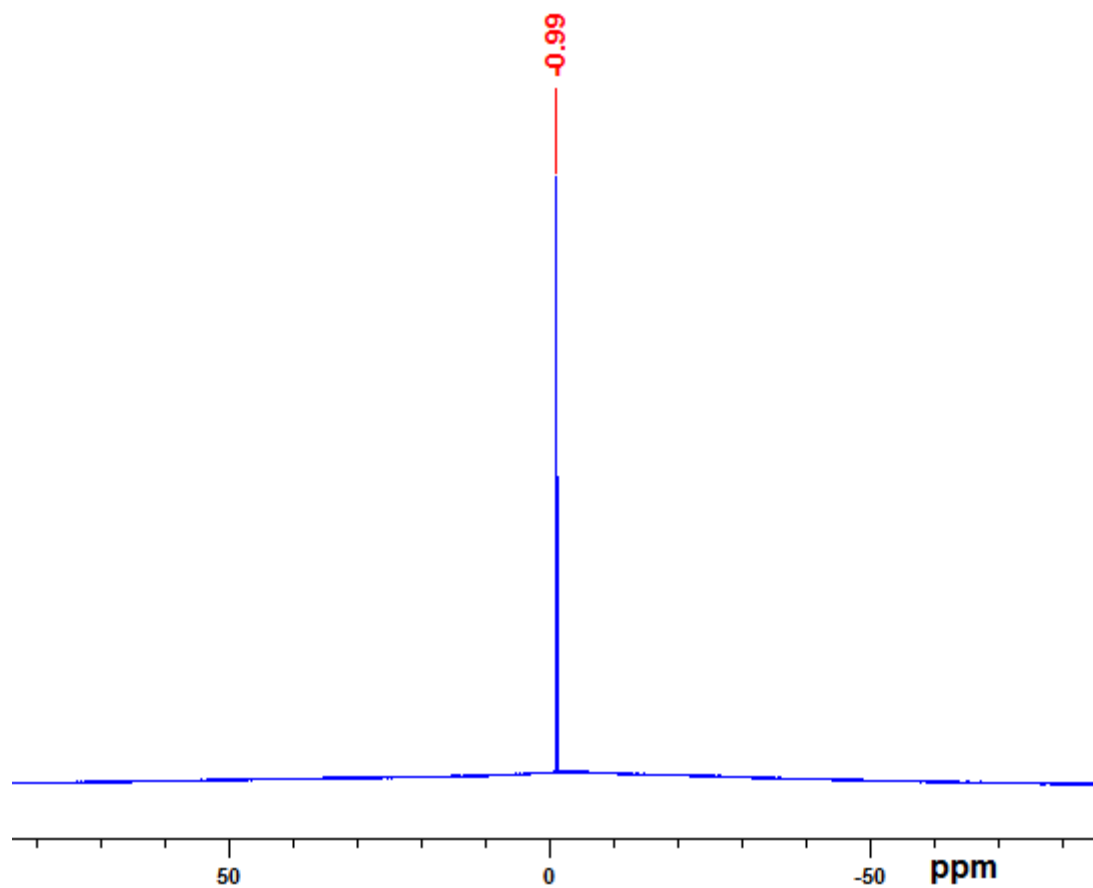

**Fig. S55.**  $^{11}\text{B}$  NMR spectrum of  $\{[(\text{Ebpis})_{1.5}\text{Cu}][\text{BF}_4]\}_n$  (**14**) in  $\text{CDCl}_3$  at room temperature.



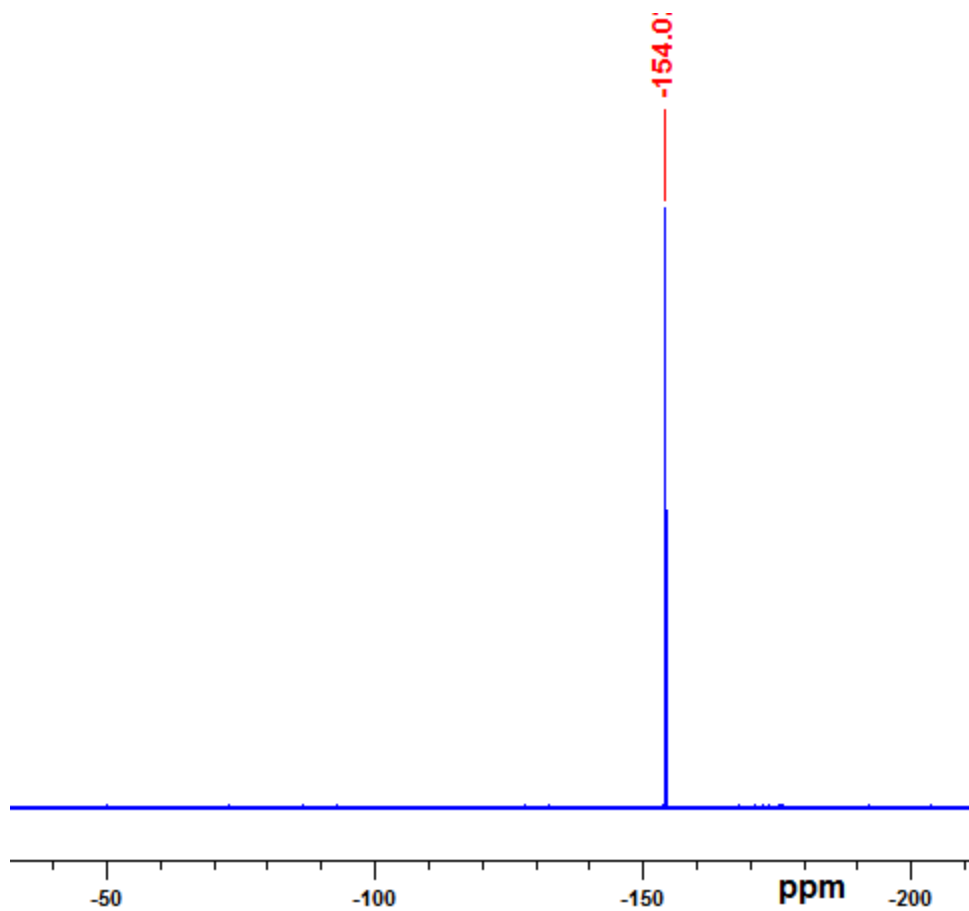

**Fig. S56.**  $^{19}\text{F}$  NMR spectrum of  $\{[(\text{Ebpis})_{1.5}\text{Cu}][\text{BF}_4]\}_n$  (**14**) in  $\text{CDCl}_3$  at room temperature.

Table S1. Structural parameters of compounds 1-5.

|                                                              | <b>1</b>                                             | <b>2</b>                                             | <b>3</b>                                              | <b>4</b>                                            | <b>5</b>                                             |
|--------------------------------------------------------------|------------------------------------------------------|------------------------------------------------------|-------------------------------------------------------|-----------------------------------------------------|------------------------------------------------------|
| Empirical formula                                            | C <sub>21</sub> H <sub>31</sub> N <sub>2</sub> SCuCl | C <sub>21</sub> H <sub>24</sub> N <sub>2</sub> SCuBr | C <sub>21</sub> H <sub>24</sub> N <sub>2</sub> SeCuBr | C <sub>21</sub> H <sub>24</sub> N <sub>2</sub> SCuI | C <sub>21</sub> H <sub>24</sub> N <sub>2</sub> SeCuI |
| Formula weight                                               | 435.50                                               | 479.93                                               | 526.85                                                | 526.95                                              | 573.85                                               |
| Temperature (K)                                              | 298                                                  | 298                                                  | 298                                                   | 298                                                 | 298                                                  |
| Crystal system                                               | Monoclinic                                           | Monoclinic                                           | Monoclinic                                            | Monoclinic                                          | Monoclinic                                           |
| Space group                                                  | P2 <sub>1</sub> /c                                   | P2 <sub>1</sub> /c                                   | P2 <sub>1</sub> /c                                    | P2 <sub>1</sub> /c                                  | P2 <sub>1</sub> /c                                   |
| <i>a</i> /Å                                                  | 11.0627(5)                                           | 11.2039(4)                                           | 11.204(2)                                             | 11.5024(12)                                         | 11.5428(5)                                           |
| <i>b</i> /Å                                                  | 15.3677(6)                                           | 15.3755(6)                                           | 15.341(2)                                             | 15.4127(14)                                         | 15.3915(8)                                           |
| <i>c</i> /Å                                                  | 13.7074(6)                                           | 13.6204(6)                                           | 13.7742(11)                                           | 13.6155(16)                                         | 13.7448(7)                                           |
| $\alpha$ /°                                                  | 90                                                   | 90                                                   | 90                                                    | 90                                                  | 90                                                   |
| $\beta$ /°                                                   | 113.378(5)                                           | 112.795(5)                                           | 112.615(15)                                           | 112.632(13)                                         | 112.364(5)                                           |
| $\gamma$ /°                                                  | 90                                                   | 90                                                   | 90                                                    | 90                                                  | 90                                                   |
| Volume (Å <sup>3</sup> )                                     | 2139.06(18)                                          | 2163.07(14)                                          | 2185.3(6)                                             | 2227.9(5)                                           | 2258.3(2)                                            |
| <i>Z</i>                                                     | 4                                                    | 4                                                    | 4                                                     | 4                                                   | 4                                                    |
| $\rho_{\text{calc}}/\text{mg mm}^{-3}$                       | 1.3522                                               | 1.474                                                | 1.6012                                                | 1.5709                                              | 1.6877                                               |
| Absorption coefficient<br>( $\mu/\text{mm}^{-1}$ )           | 3.540                                                | 4.529                                                | 5.495                                                 | 13.179                                              | 13.981                                               |
| <i>F</i> (000)                                               | 900.7                                                | 976.0                                                | 1036.0                                                | 1042.9                                              | 1110.4                                               |
| Reflections collected                                        | 5620                                                 | 8986                                                 | 5465                                                  | 8950                                                | 9201                                                 |
| <i>R</i> <sub>int</sub>                                      | 0.0214                                               | 0.0242                                               | 0.0206                                                | 0.0442                                              | 0.0314                                               |
| GOF on <i>F</i> <sup>2</sup>                                 | 1.062                                                | 1.054                                                | 1.017                                                 | 1.063                                               | 1.021                                                |
| <i>R</i> <sub>1</sub> ( <i>I</i> >2 $\sigma$ ( <i>I</i> ))   | 0.0506                                               | 0.0458                                               | 0.0556                                                | 0.0850                                              | 0.0490                                               |
| w <i>R</i> <sub>2</sub> ( <i>I</i> >2 $\sigma$ ( <i>I</i> )) | 0.1450                                               | 0.1207                                               | 0.2110                                                | 0.3193                                              | 0.1503                                               |
| <i>R</i> <sub>1</sub> values (all data)                      | 0.0656                                               | 0.0546                                               | 0.0674                                                | 0.1158                                              | 0.0623                                               |
| <i>R</i> <sub>2</sub> values (all data)                      | 0.1700                                               | 0.1309                                               | 0.2111                                                | 0.3194                                              | 0.1504                                               |

**Table S2.** Structural parameters of compounds **7**, **9** and **10**.

|                                                              | <b>7</b>                                                                                       | <b>9</b>                                                                         | <b>11</b>                                                                        |
|--------------------------------------------------------------|------------------------------------------------------------------------------------------------|----------------------------------------------------------------------------------|----------------------------------------------------------------------------------|
| Empirical formula                                            | C <sub>42</sub> H <sub>48</sub> N <sub>4</sub> Cl <sub>2</sub> Cu <sub>2</sub> Se <sub>2</sub> | C <sub>42</sub> H <sub>48</sub> N <sub>4</sub> F <sub>6</sub> PCuSe <sub>2</sub> | C <sub>54</sub> H <sub>72</sub> N <sub>4</sub> PCuSe <sub>2</sub> F <sub>6</sub> |
| Formula weight                                               | 964.79                                                                                         | 975.30                                                                           | 1143.63                                                                          |
| Temperature (K)                                              | 298                                                                                            | 298                                                                              | 298                                                                              |
| Crystal system                                               | Monoclinic                                                                                     | Monoclinic                                                                       | Monoclinic                                                                       |
| Space group                                                  | P2 <sub>1</sub> /n                                                                             | P2 <sub>1</sub> /n                                                               | C2/c                                                                             |
| <i>a</i> /Å                                                  | 8.3465(2)                                                                                      | 8.4401(2)                                                                        | 19.5751(8)                                                                       |
| <i>b</i> /Å                                                  | 19.3330(5)                                                                                     | 18.3180(4)                                                                       | 16.3426(4)                                                                       |
| <i>c</i> /Å                                                  | 13.4761(3)                                                                                     | 14.4474(3)                                                                       | 20.4314(10)                                                                      |
| $\alpha$ /°                                                  | 90                                                                                             | 90                                                                               | 90                                                                               |
| $\beta$ /°                                                   | 96.742(2)                                                                                      | 98.023(2)                                                                        | 113.637(5)                                                                       |
| $\gamma$ /°                                                  | 90                                                                                             | 90                                                                               | 90                                                                               |
| Volume (Å <sup>3</sup> )                                     | 2159.51(10)                                                                                    | 2211.79(9)                                                                       | 5987.8(5)                                                                        |
| <i>Z</i>                                                     | 2                                                                                              | 2                                                                                | 4                                                                                |
| $\rho_{\text{calc}}/\text{mg mm}^{-3}$                       | 1.4836                                                                                         | 1.4644                                                                           | 1.2685                                                                           |
| Absorption coefficient ( $\mu/\text{mm}^{-1}$ )              | 4.531                                                                                          | 3.421                                                                            | 2.601                                                                            |
| <i>F</i> (000)                                               | 968.2                                                                                          | 984.1                                                                            | 2353.1                                                                           |
| Reflections collected                                        | 8771                                                                                           | 7598                                                                             | 10607                                                                            |
| <i>R</i> <sub>int</sub>                                      | 0.0497                                                                                         | 0.0193                                                                           | 0.0223                                                                           |
| GOF on <i>F</i> <sup>2</sup>                                 | 1.046                                                                                          | 1.040                                                                            | 1.045                                                                            |
| <i>R</i> <sub>1</sub> ( <i>I</i> >2 $\sigma$ ( <i>I</i> ))   | 0.0463                                                                                         | 0.0472                                                                           | 0.0542                                                                           |
| w <i>R</i> <sub>2</sub> ( <i>I</i> >2 $\sigma$ ( <i>I</i> )) | 0.1347                                                                                         | 0.1319                                                                           | 0.1516                                                                           |
| <i>R</i> <sub>1</sub> values (all data)                      | 0.0545                                                                                         | 0.0588                                                                           | 0.0665                                                                           |
| <i>R</i> <sub>2</sub> values (all data)                      | 0.1525                                                                                         | 0.1522                                                                           | 0.1697                                                                           |

**Table S3.** Structural parameters of compounds **12-14**.

|                                                              | <b>12</b>                                                                      | <b>13</b>                                          | <b>14</b>                                                                        |
|--------------------------------------------------------------|--------------------------------------------------------------------------------|----------------------------------------------------|----------------------------------------------------------------------------------|
| Empirical formula                                            | C <sub>74</sub> H <sub>63</sub> NP <sub>4</sub> Cu <sub>4</sub> I <sub>4</sub> | C <sub>5</sub> H <sub>7</sub> CuIN <sub>2</sub> Se | C <sub>21</sub> H <sub>33</sub> N <sub>6</sub> BF <sub>4</sub> CuSe <sub>3</sub> |
| Formula weight                                               | 1887.03                                                                        | 364.53                                             | 756.78                                                                           |
| Temperature (K)                                              | 298                                                                            | 298                                                | 298                                                                              |
| Crystal system                                               | Monoclinic                                                                     | Monoclinic                                         | Tetragonal                                                                       |
| Space group                                                  | C2/c                                                                           | P2 <sub>1</sub> /c                                 | P4 <sub>1</sub> 2 <sub>1</sub> 2                                                 |
| <i>a</i> /Å                                                  | 26.6333(12)                                                                    | 9.8486(4)                                          | 16.4174(2)                                                                       |
| <i>b</i> /Å                                                  | 16.1396(6)                                                                     | 10.7720(3)                                         | 16.4174(2)                                                                       |
| <i>c</i> /Å                                                  | 18.2784(8)                                                                     | 8.0970(3)                                          | 22.1831(4)                                                                       |
| $\alpha$ /°                                                  | 90                                                                             | 90                                                 | 90                                                                               |
| $\beta$ /°                                                   | 110.048(5)                                                                     | 103.735(4)                                         | 90                                                                               |
| $\gamma$ /°                                                  | 90                                                                             | 90                                                 | 90                                                                               |
| Volume (Å <sup>3</sup> )                                     | 7380.9(6)                                                                      | 834.44(5)                                          | 5979.02(16)                                                                      |
| <i>Z</i>                                                     | 4                                                                              | 4                                                  | 8                                                                                |
| $\rho_{\text{calc}}/\text{mg mm}^{-3}$                       | 1.6980                                                                         | 2.9015                                             | 1.6813                                                                           |
| Absorption coefficient<br>( $\mu/\text{mm}^{-1}$ )           | 15.579                                                                         | 10.604                                             | 5.613                                                                            |
| <i>F</i> (000)                                               | 3650.2                                                                         | 667.7                                              | 2955.9                                                                           |
| Reflections collected                                        | 13446                                                                          | 3108                                               | 12308                                                                            |
| <i>R</i> <sub>int</sub>                                      | 0.0691                                                                         | 0.0326                                             | 0.0230                                                                           |
| GOF on <i>F</i> <sup>2</sup>                                 | 1.027                                                                          | 1.007                                              | 1.047                                                                            |
| <i>R</i> <sub>1</sub> ( <i>I</i> >2 $\sigma$ ( <i>I</i> ))   | 0.0790                                                                         | 0.0443                                             | 0.0395                                                                           |
| w <i>R</i> <sub>2</sub> ( <i>I</i> >2 $\sigma$ ( <i>I</i> )) | 0.2104                                                                         | 0.1237                                             | 0.1025                                                                           |
| <i>R</i> <sub>1</sub> values (all data)                      | 0.0917                                                                         | 0.0572                                             | 0.0478                                                                           |
| <i>R</i> <sub>2</sub> values (all data)                      | 0.2419                                                                         | 0.1395                                             | 0.1121                                                                           |

# Supporting Information: Part 2

## Cu(I)-catalyzed azide-alkyne cycloaddition reactions (CuAAC).

1. 1-benzyl-4-phenyl-1*H*-1,2,3-triazole (**Ia**)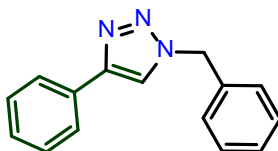

$^1\text{H}$  NMR (400 MHz,  $\text{CDCl}_3$ ):  $\delta$  7.77-7.79 (d, 2H), 7.66 (s, 1H), 7.27-7.39 (m, 8H), 5.53 (s, 2H) ppm.  $^{13}\text{C}$  NMR (100 MHz,  $\text{CDCl}_3$ ):  $\delta$  134.74, 130.58, 129.16, 128.83, 128.78, 128.18, 128.07, 125.71, 119.62, 54.21 ppm.

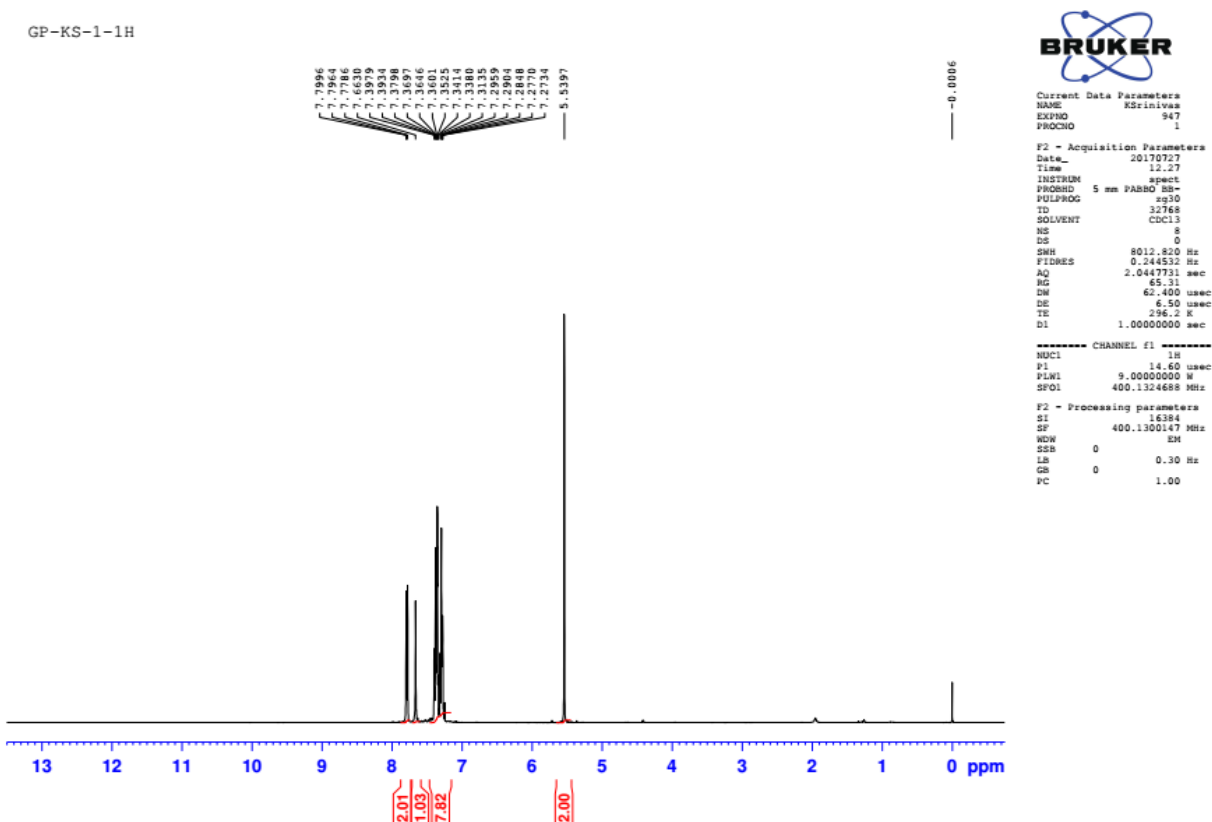

Fig. S57.  $^1\text{H}$  NMR spectrum of **Ia** in  $\text{CDCl}_3$  at room temperature.

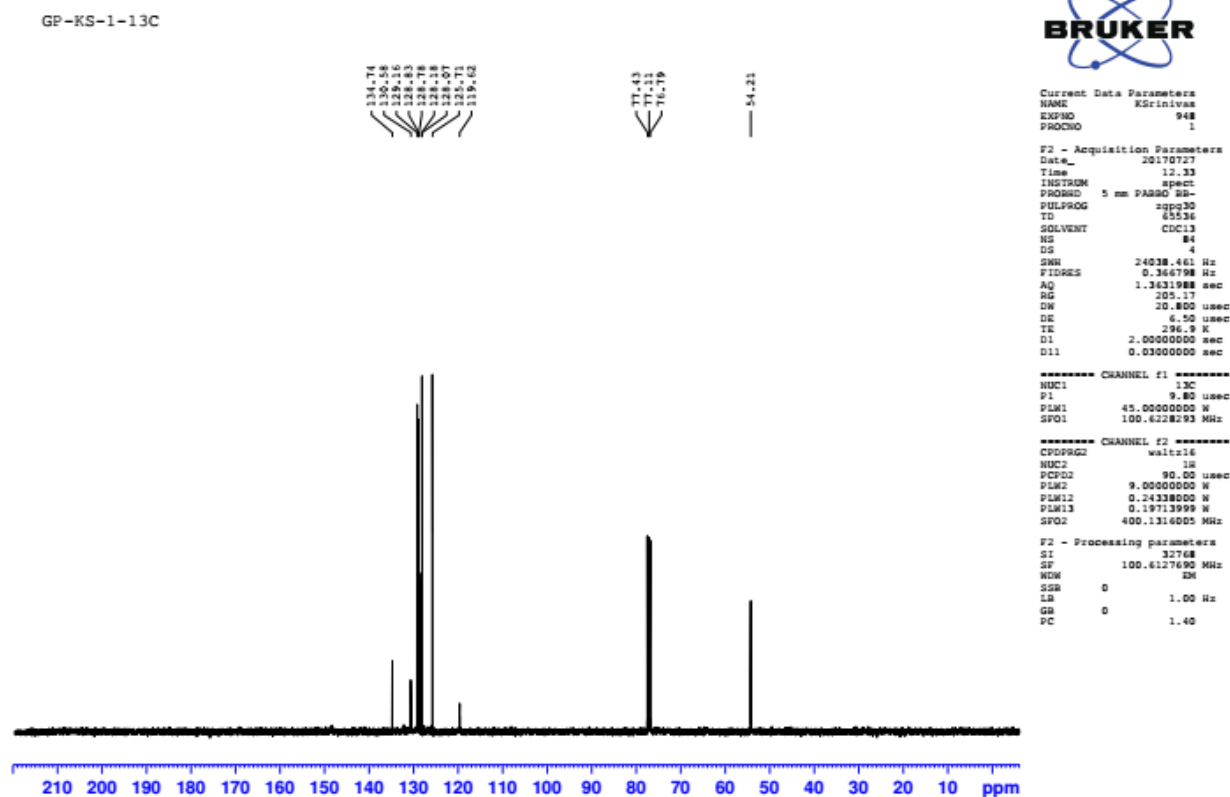

Fig. S58.  $^{13}\text{C}$  NMR spectrum of **Ia** in  $\text{CDCl}_3$  at room temperature.

## 2. 1-benzyl-4-(*p*-tolyl)-1*H*-1,2,3-triazole (**Ib**)

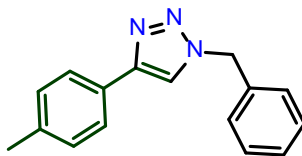

$^1\text{H}$  NMR (400 MHz,  $\text{CDCl}_3$ ):  $\delta$  7.61-7.68 (m, 3H), 7.17-7.36 (m, 7H), 5.52 (s, 2H), 2.34 (s, 3H) ppm.  $^{13}\text{C}$  NMR (100 MHz,  $\text{CDCl}_3$ ):  $\delta$  138.01, 134.79, 129.50, 129.14, 128.74, 128.06, 127.76, 125.62, 119.28, 54.18, 21.29 ppm.

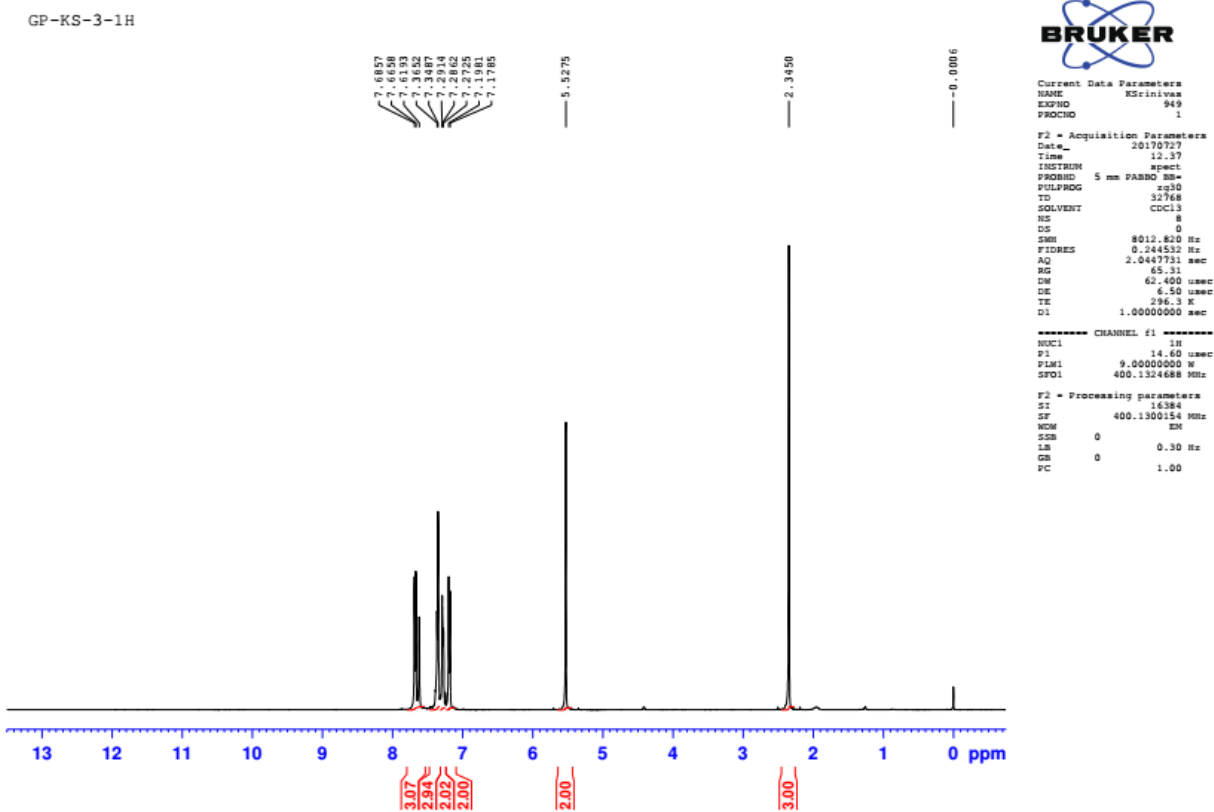

**Fig. S59.**  $^1\text{H}$  NMR spectrum of **Ib** in  $\text{CDCl}_3$  at room temperature.



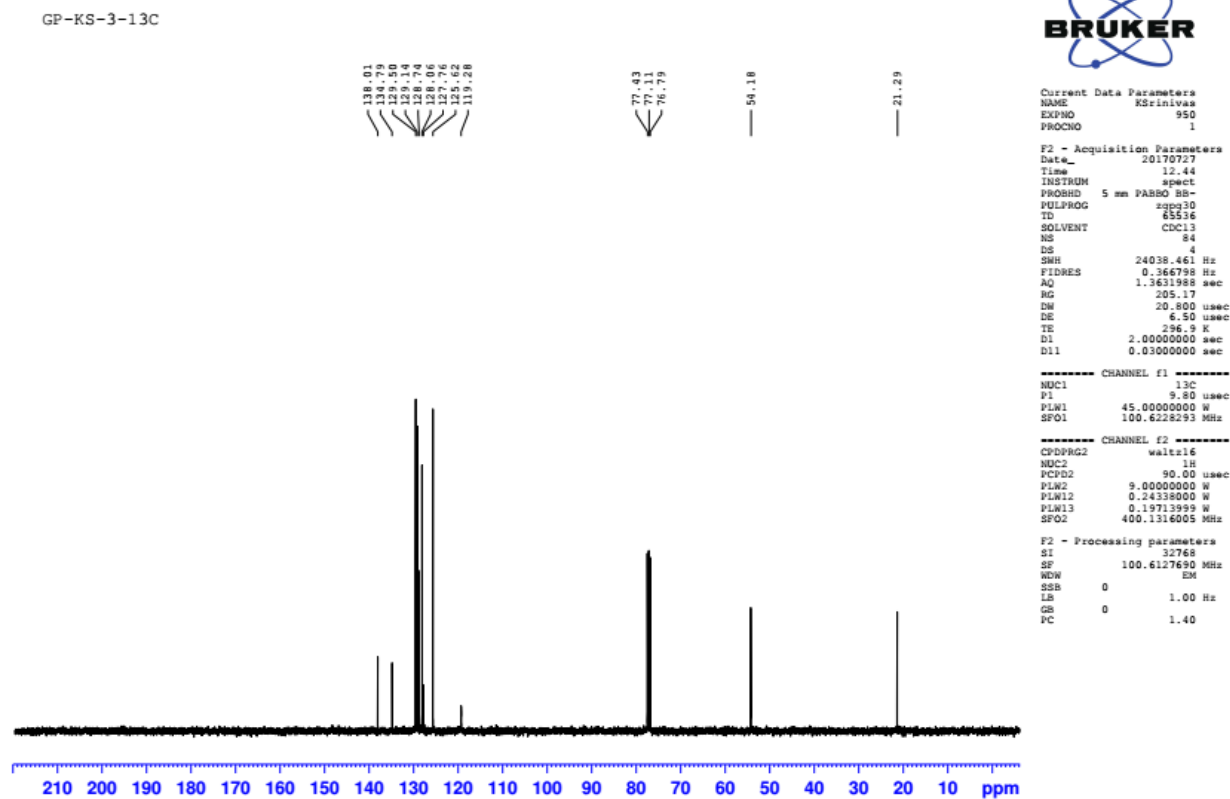

Fig. S60.  $^{13}\text{C}$  NMR spectrum of **Ib** in  $\text{CDCl}_3$  at room temperature.

### 3. 1-benzyl-4-hexyl-1H-1,2,3-triazole (**Ic**)

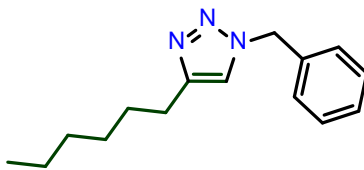

$^1\text{H}$  NMR (400 MHz,  $\text{CDCl}_3$ ):  $\delta$  7.33-7.36 (m, 3H), 7.23-7.25 (m, 2H), 7.19 (s, 1H), 5.48 (s, 2H), 2.65-2.69 (t, 2H), 1.59-1.66 (m, 2H), 1.27-1.34 (m, 6H), 0.84-0.87 (t, 3H) ppm.  $^{13}\text{C}$  NMR (100 MHz,  $\text{CDCl}_3$ ):  $\delta$  135.03, 129.03, 128.58, 127.94, 120.59, 53.97, 31.54, 29.36, 28.91, 25.75, 22.53, 14.04 ppm.

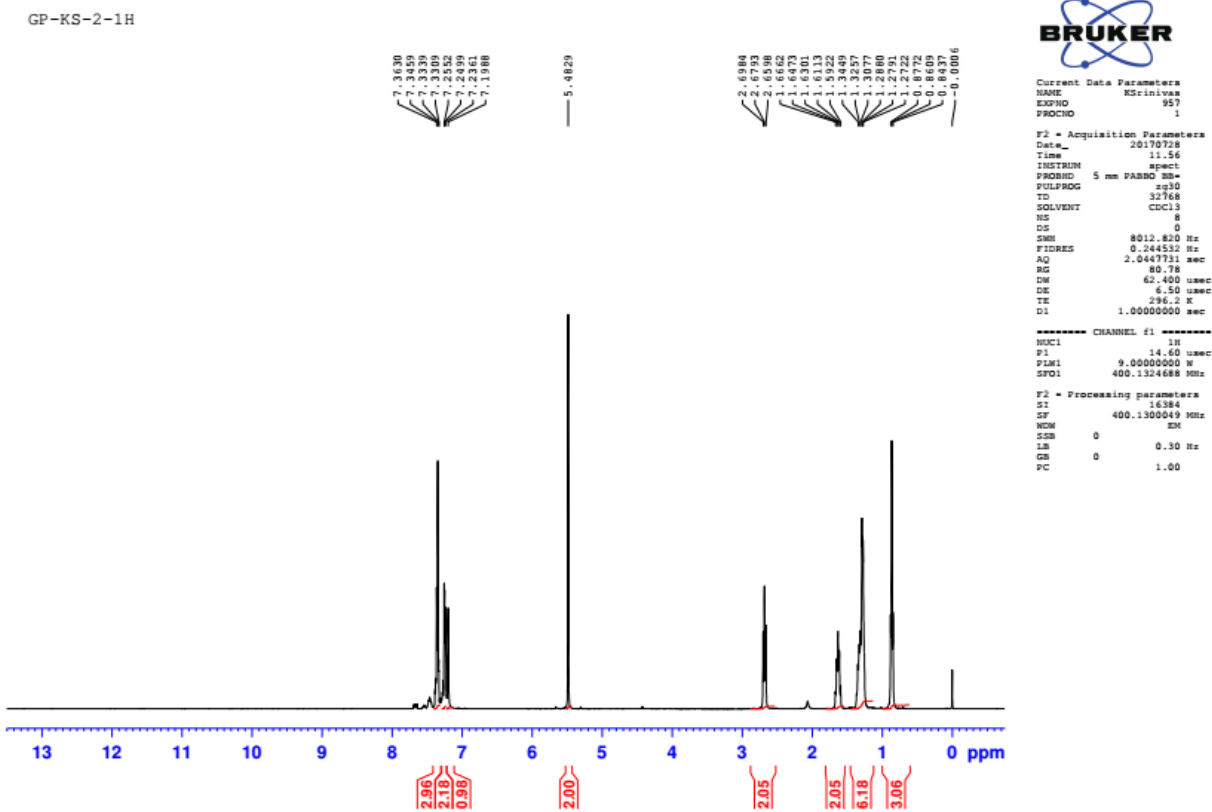

Fig. S61.  $^1\text{H}$  NMR spectrum of **Ic** in  $\text{CDCl}_3$  at room temperature.

GP-KS-2-13C

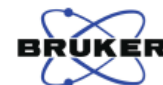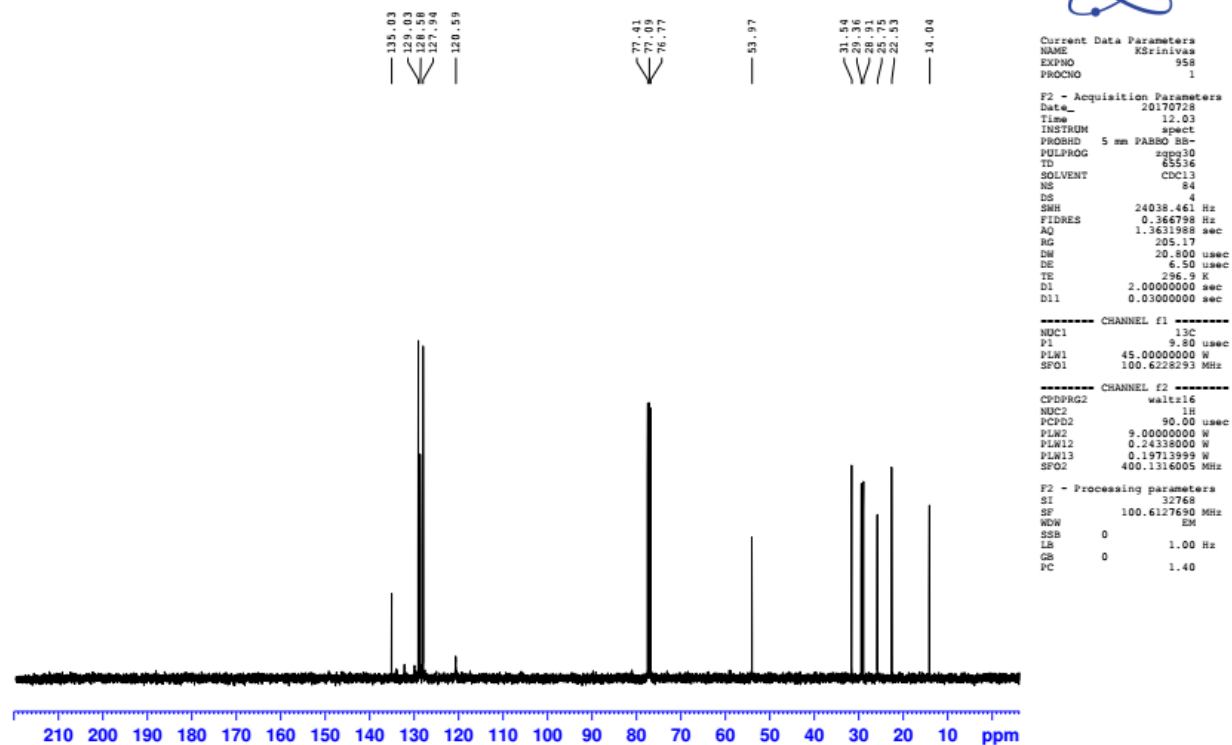

Fig. S62.  $^{13}\text{C}$  NMR spectrum of **Ic** in  $\text{CDCl}_3$  at room temperature.

#### 4. 1-benzyl-4-(*p*-toloxy)methyl-1*H*-1,2,3-triazole (**Id**)

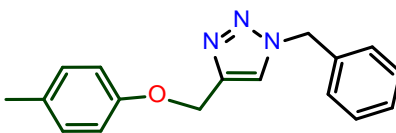

$^1\text{H}$  NMR (400 MHz,  $\text{CDCl}_3$ ):  $\delta$  7.51 (s, 1H), 7.34-7.37 (m, 3H), 7.24-7.27 (t, 2H), 7.05-7.07 (d, 2H), 6.84-6.86 (d, 2H), 5.50 (s, 2H), 5.14 (s, 2H), 2.27 (s, 3H) ppm.  $^{13}\text{C}$  NMR (100 MHz,  $\text{CDCl}_3$ ):  $\delta$  156.12, 134.52, 130.53, 129.97, 129.15, 128.80, 128.13, 122.58, 114.66, 62.26, 54.24, 20.48 ppm..

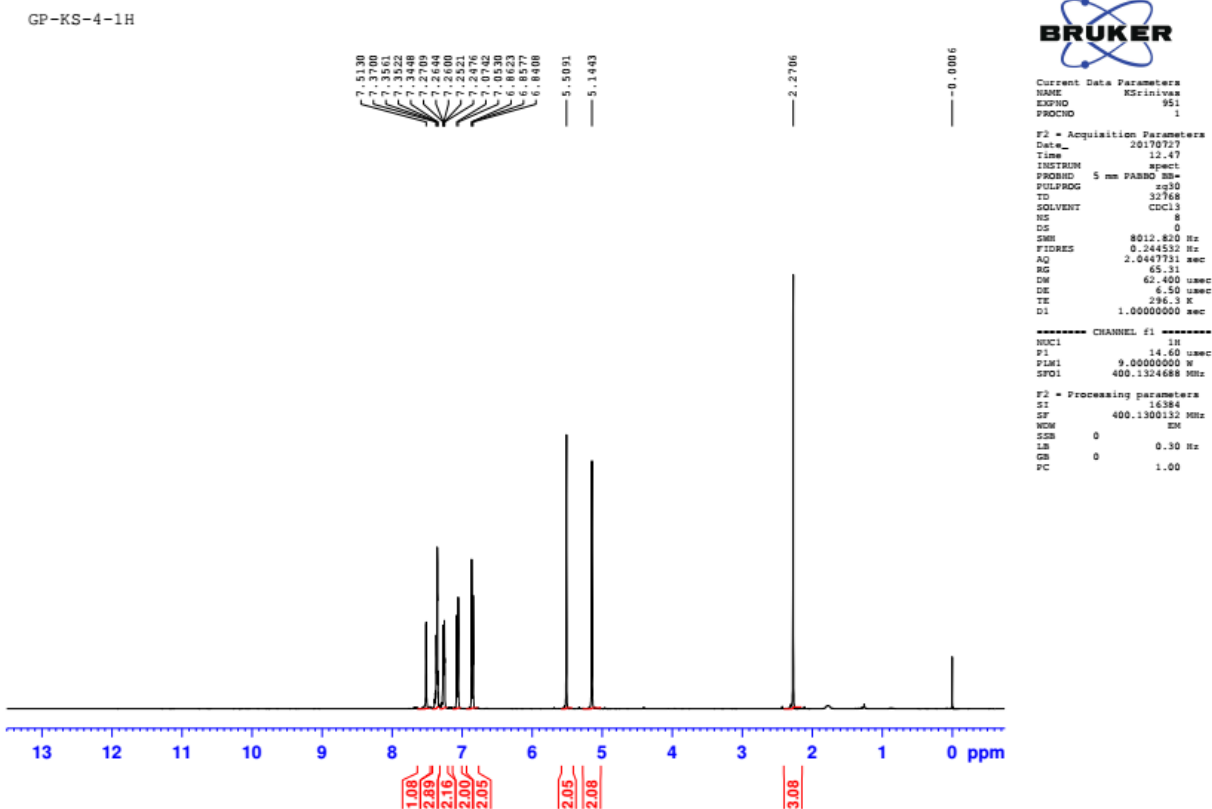

**Fig. S63.**  $^1\text{H}$  NMR spectrum of **Id** in  $\text{CDCl}_3$  at room temperature.

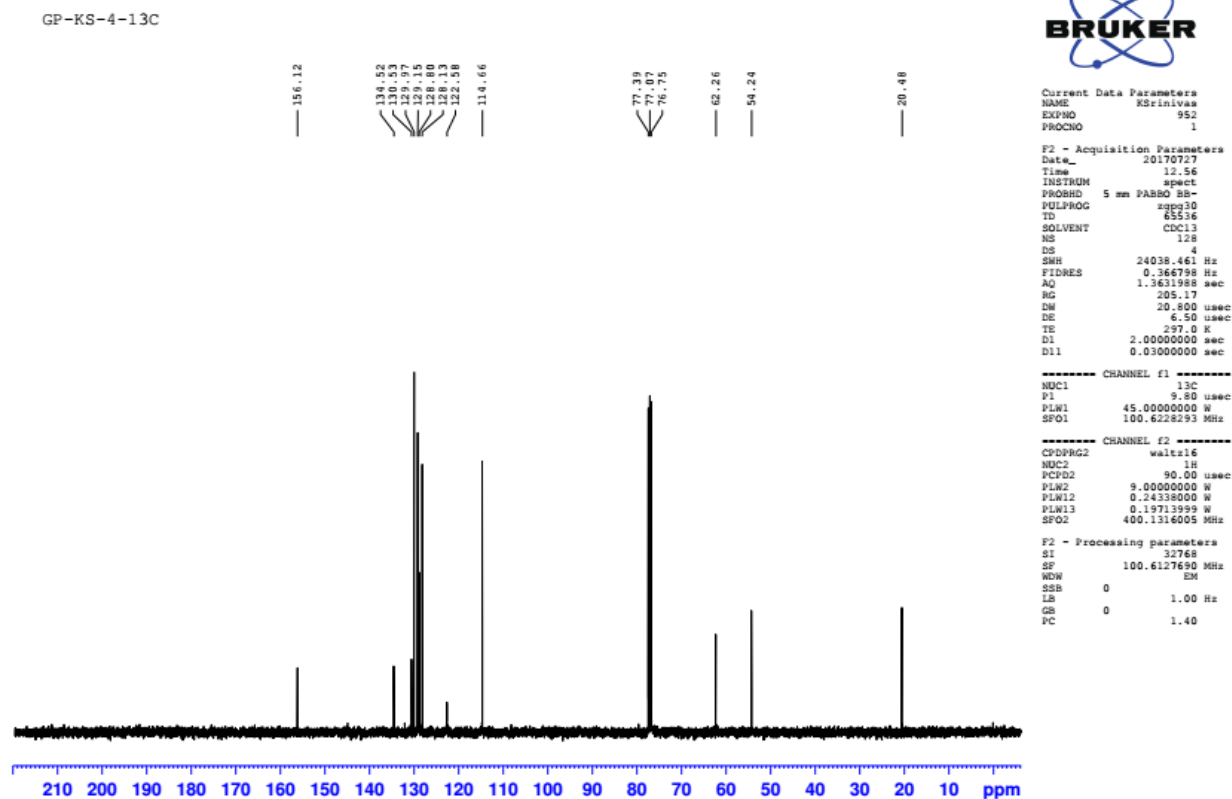

Fig. S64.  $^{13}\text{C}$  NMR spectrum of **Id** in  $\text{CDCl}_3$  at room temperature.

### 5. 1-benzyl-4-((2,6-dimethylphenoxy)methyl)-1H-1,2,3-triazole (**Ie**)

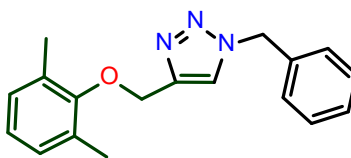

$^1\text{H}$  NMR (400 MHz,  $\text{CDCl}_3$ ):  $\delta$  7.20-7.68 (m, 6H), 6.91-7.00 (m, 3H), 5.54 (s, 2H), 4.94 (s, 2H), 2.25 (s, 6H) ppm.  $^{13}\text{C}$  NMR (100 MHz,  $\text{CDCl}_3$ ):  $\delta$  155.30, 145.11, 134.59, 132.15, 132.05, 131.98, 131.05, 129.15, 128.89, 128.80, 128.59, 128.47, 128.11, 124.24, 122.54, 65.63, 54.23, 16.36 ppm.

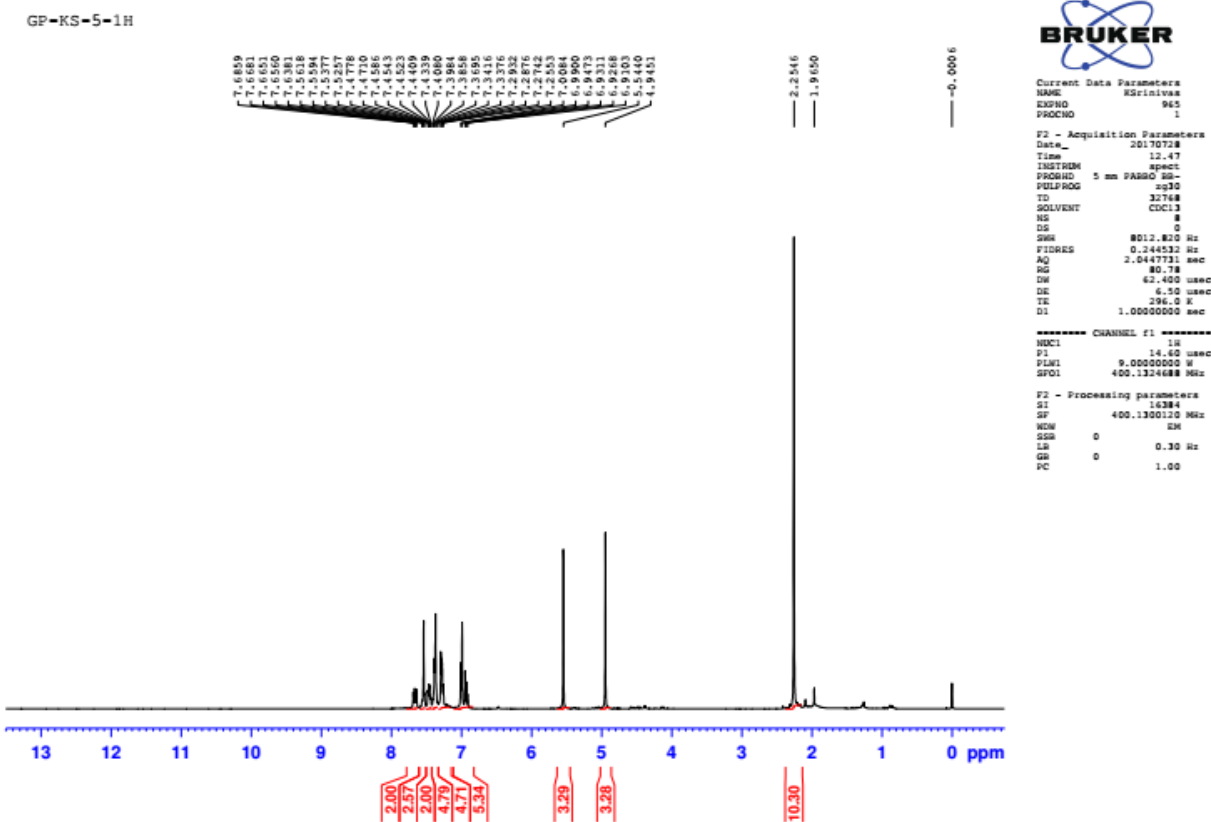

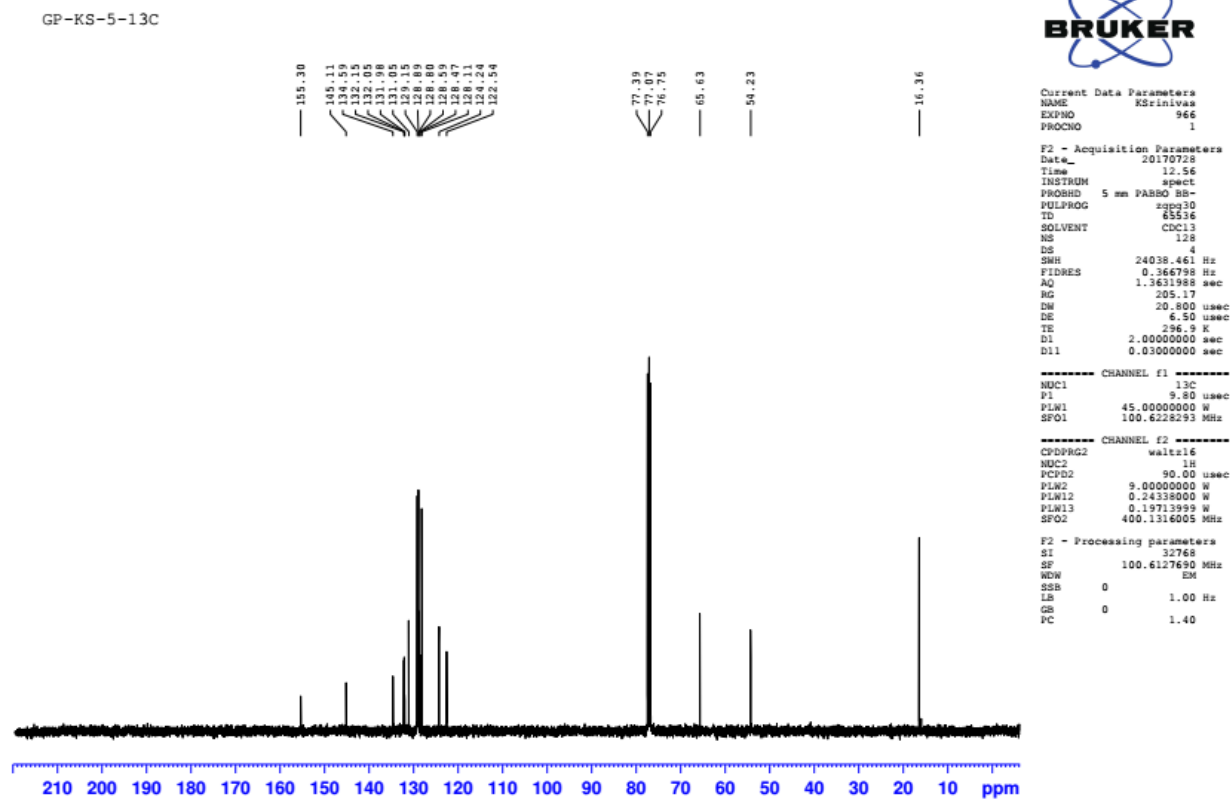

Fig. S66.  $^{13}\text{C}$  NMR spectrum of **1e** in  $\text{CDCl}_3$  at room temperature.

6. 1-(4-nitrobenzyl)-4-phenyl-1H-1,2,3-triazole (**IIa**)

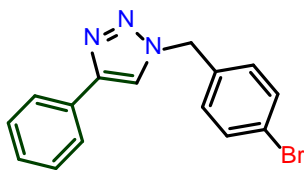

$^1\text{H}$  NMR (400 MHz,  $\text{CDCl}_3$ ):  $\delta$  7.14-7.79 (m, 10H), 5.49 (s, 2H) ppm.  $^{13}\text{C}$  NMR (100 MHz,  $\text{CDCl}_3$ ):  $\delta$  148.38, 133.75, 132.32, 130.38, 129.66, 128.86, 128.30, 125.72, 122.93, 119.54, 53.50 ppm.

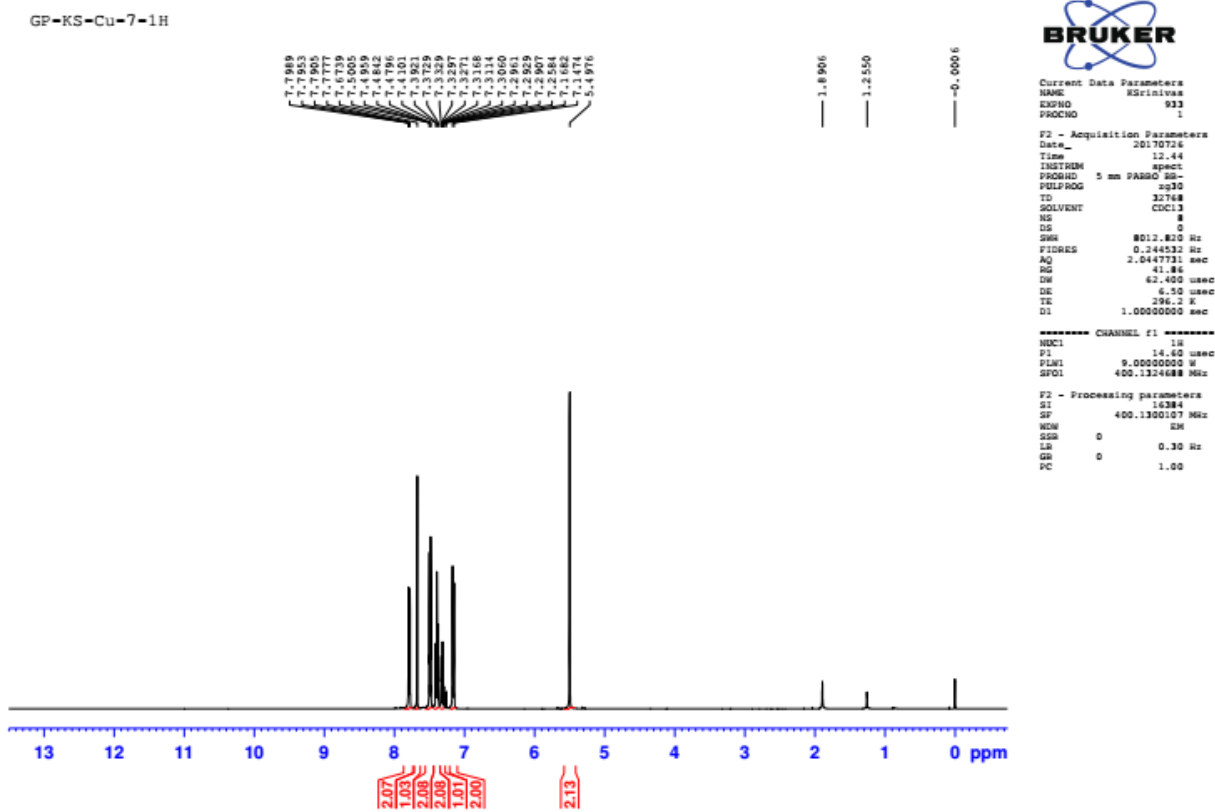

Fig. S67.  $^1\text{H}$  NMR spectrum of **IIa** in  $\text{CDCl}_3$  at room temperature.



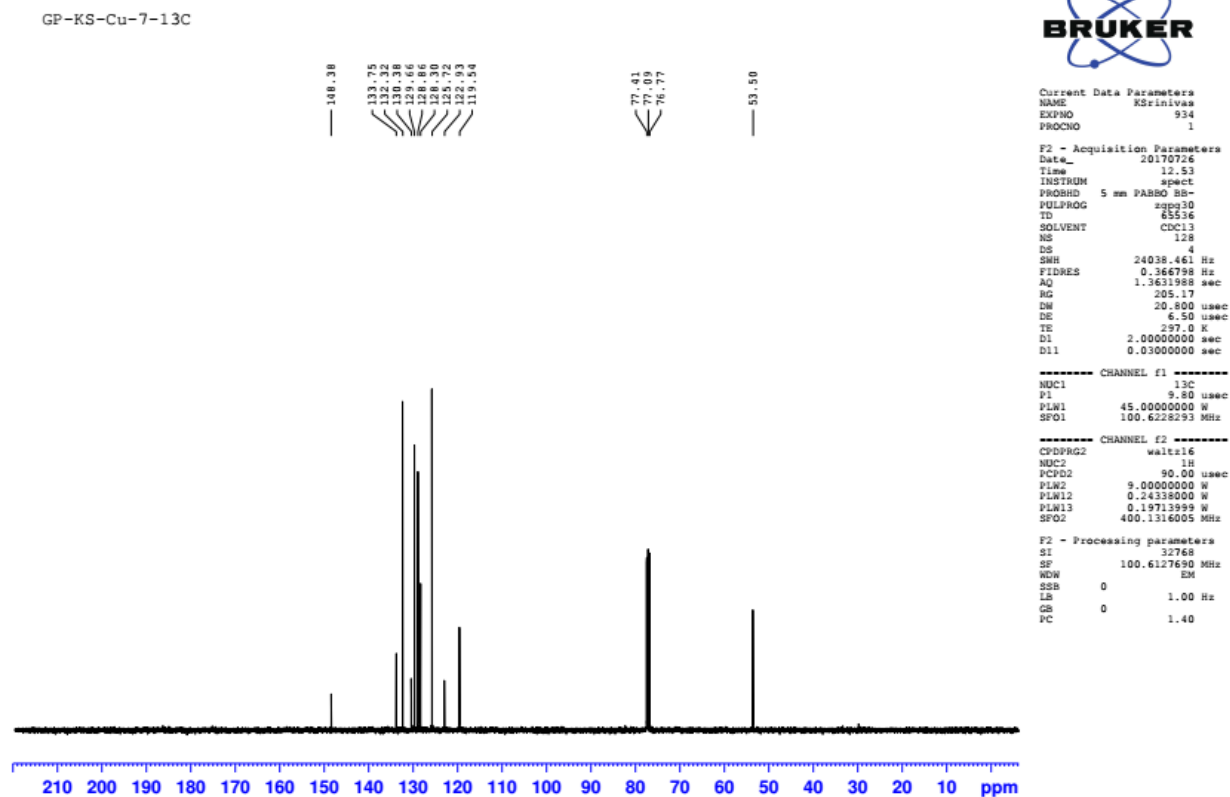

Fig. S68.  $^{13}\text{C}$  NMR spectrum of **IIa** in  $\text{CDCl}_3$  at room temperature.

7. 1-(4-nitrobenzyl)-4-(*p*-tolyl)-1*H*-1,2,3-triazole (**IIb**)

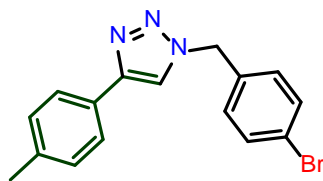

$^1\text{H}$  NMR (400 MHz,  $\text{CDCl}_3$ ):  $\delta$  7.62-7.68 (m, 3H), 7.47-7.51 (m, 2H), 7.15-7.21 (m, 4H), 5.49 (s, 2H), 2.35 (s, 3H) ppm.  $^{13}\text{C}$  NMR (100 MHz,  $\text{CDCl}_3$ ):  $\delta$  148.48, 138.16, 133.80, 132.30, 129.65, 128.53, 127.55, 125.62, 122.90, 119.14, 53.48, 21.30 ppm.

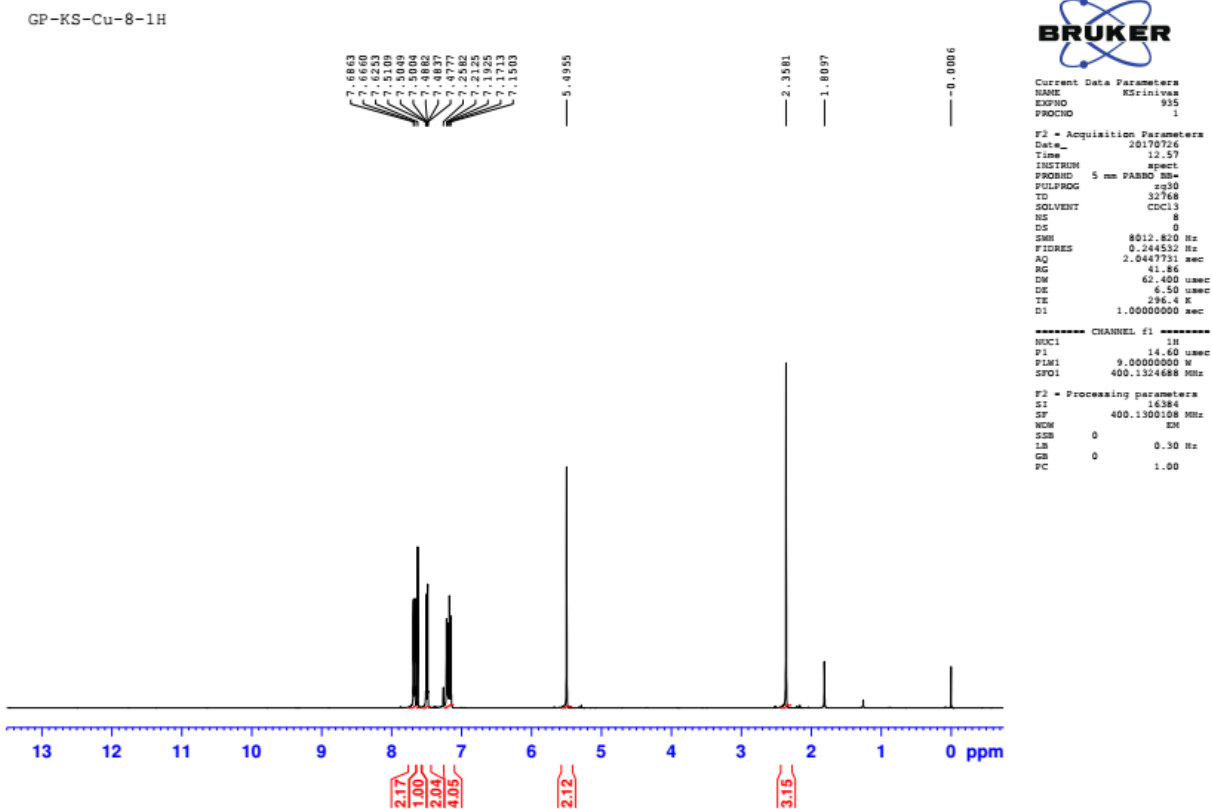

Fig. S69.  $^1\text{H}$  NMR spectrum of **IIb** in  $\text{CDCl}_3$  at room temperature.

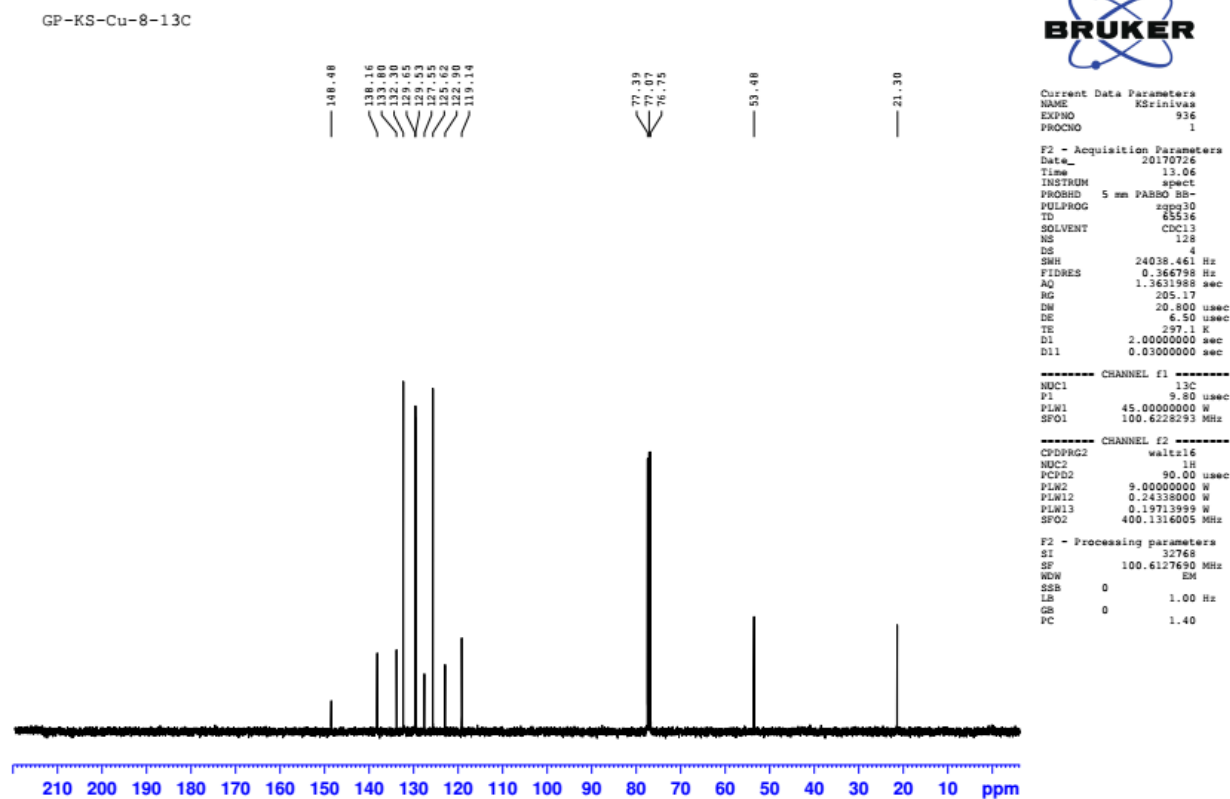

Fig. S70.  $^{13}\text{C}$  NMR spectrum of **IIb** in  $\text{CDCl}_3$  at room temperature.

### 8. 4-hexyl-1-(4-nitrobenzyl)-1H-1,2,3-triazole (**IIc**)

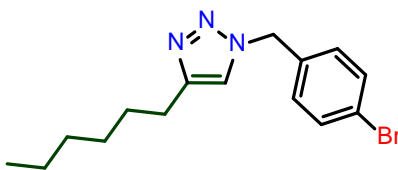

$^1\text{H}$  NMR (400 MHz,  $\text{CDCl}_3$ ):  $\delta$  7.47-7.49 (m, 2H), 7.11-7.19 (m, 3H), 5.44 (s, 2H), 2.66-2.70 (t, 2H), 1.59-1.64 (m, 2H), 1.25-1.34 (m, 6H), 0.84-0.88 (t, 3H) ppm.  $^{13}\text{C}$  NMR (100 MHz,  $\text{CDCl}_3$ ):  $\delta$  149.25, 134.04, 132.21, 129.55, 128.57, 128.45, 122.74, 120.49, 53.28, 31.52, 29.34, 28.90, 25.71, 22.53, 14.04 ppm.

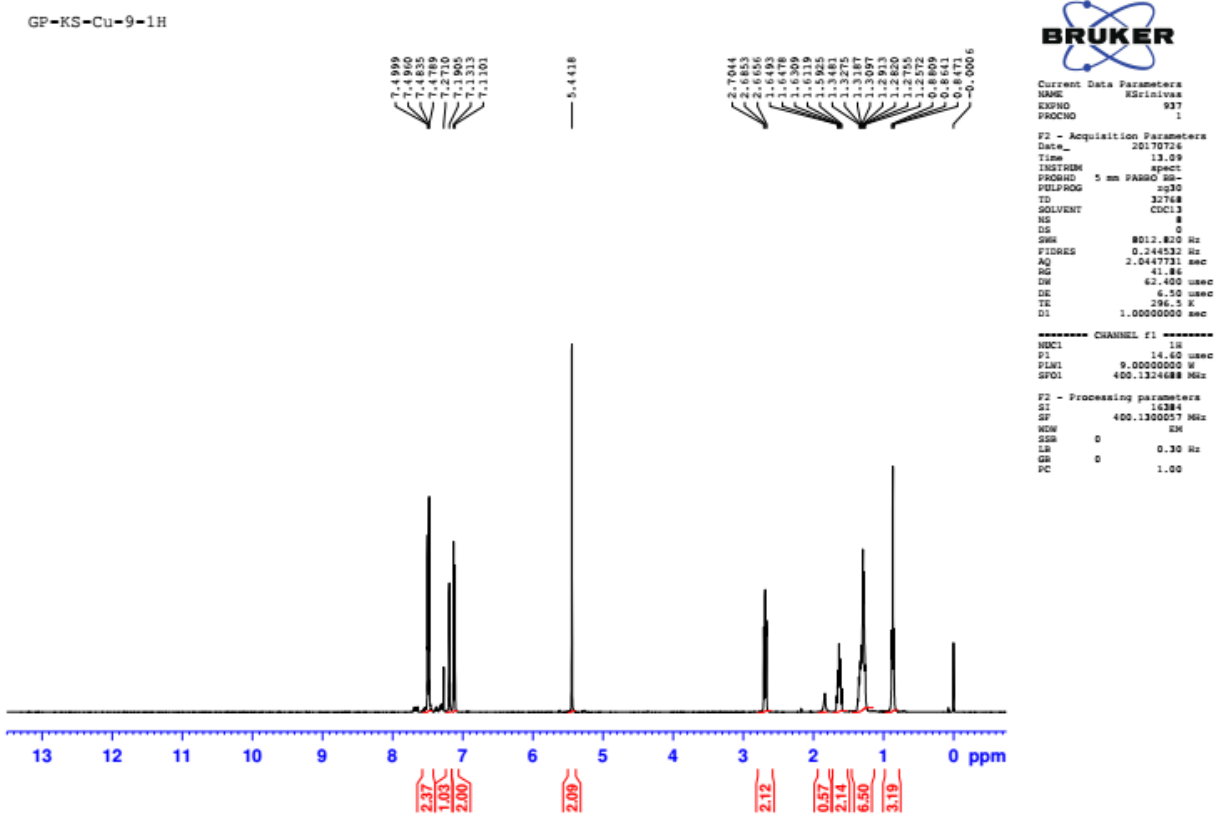

Fig. S71.  $^1\text{H}$  NMR spectrum of **IIc** in  $\text{CDCl}_3$  at room temperature.

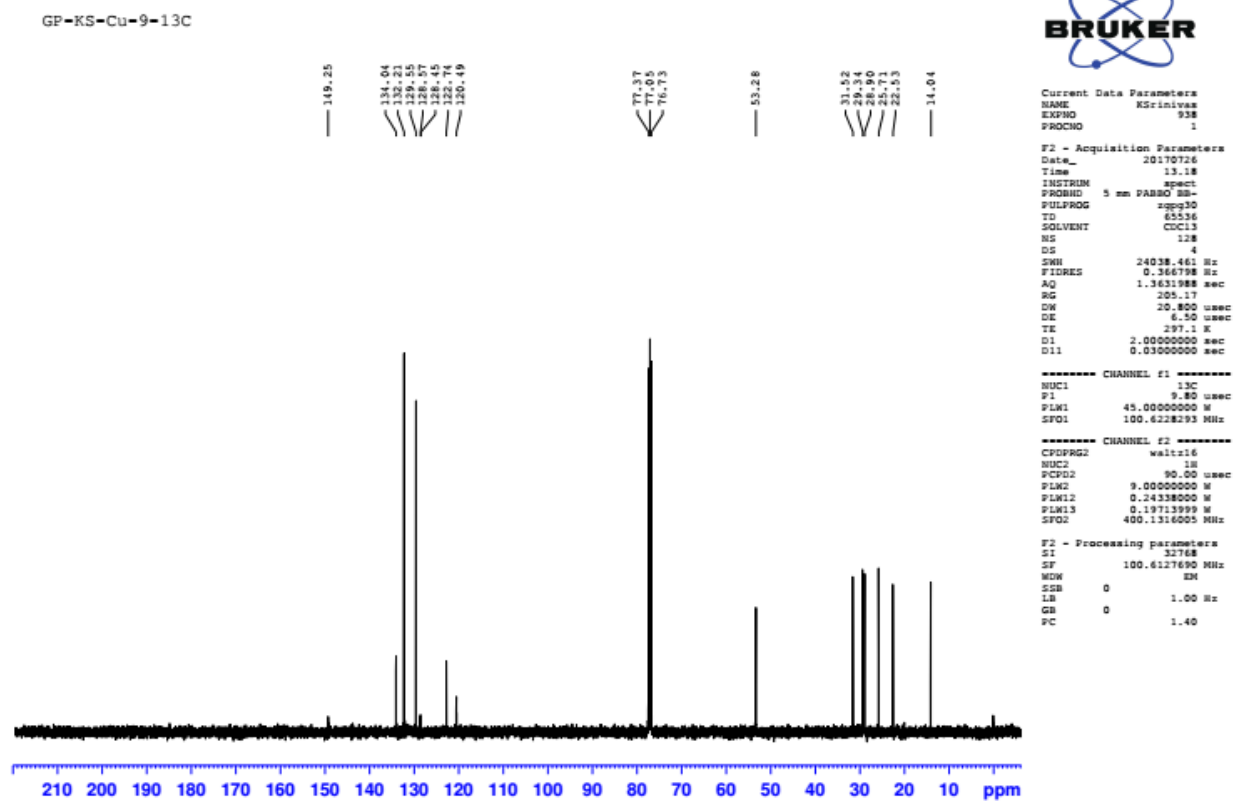

Fig. S72.  $^{13}\text{C}$  NMR spectrum of **IIc** in  $\text{CDCl}_3$  at room temperature.

**9. 1-(4-nitrobenzyl)-4-((*p*-tolyl)oxy)methyl)-1*H*-1,2,3-triazole (**IId**)**

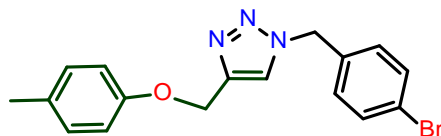

$^1\text{H}$  NMR (400 MHz,  $\text{CDCl}_3$ ):  $\delta$  7.47-7.51 (m, 3H), 7.05-7.14 (m, 4H), 6.83-6.86 (m, 2H), 5.46 (s, 2H), 5.15 (s, 2H), 2.27 (s, 3H) ppm.  $^{13}\text{C}$  NMR (100 MHz,  $\text{CDCl}_3$ ):  $\delta$  156.06, 145.13, 133.54, 132.32, 130.60, 129.98, 129.70, 122.98, 122.53, 114.66, 62.20, 53.52, 20.48 ppm.

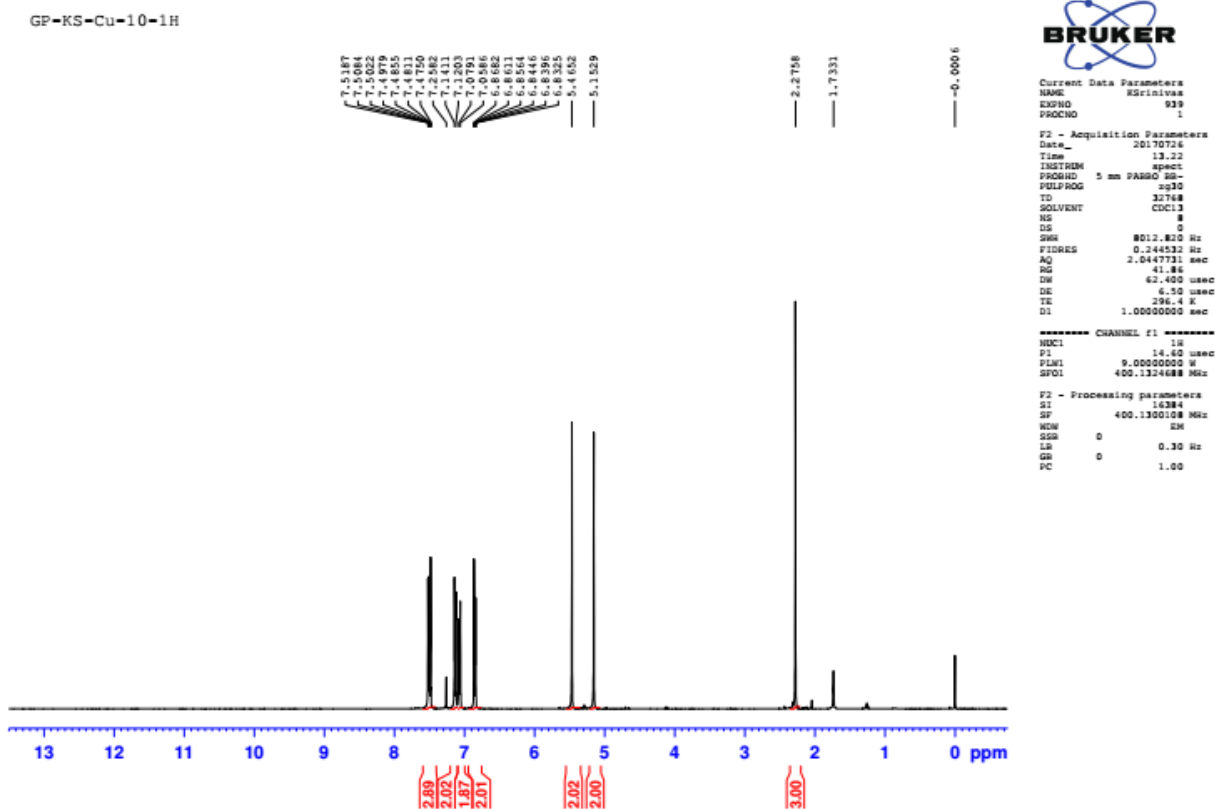

Fig. S73.  $^1\text{H}$  NMR spectrum of **IIId** in  $\text{CDCl}_3$  at room temperature.

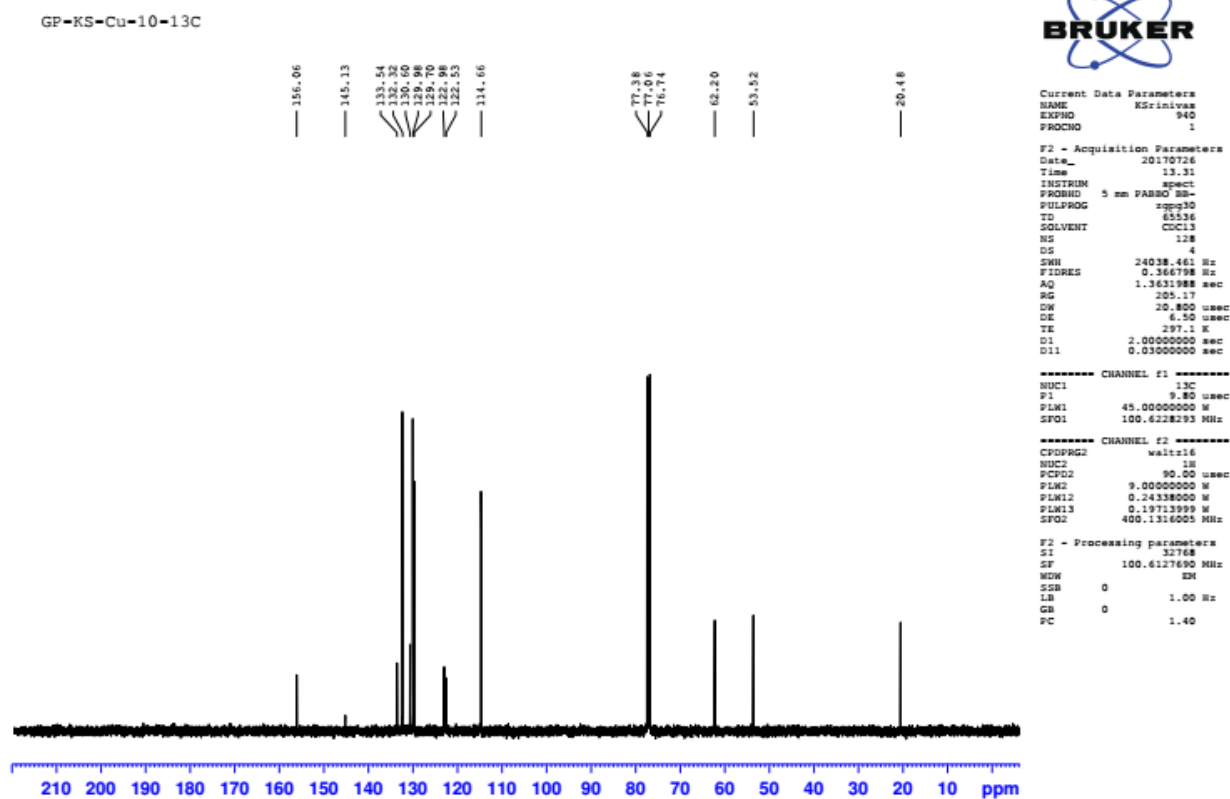

Fig. S74.  $^{13}\text{C}$  NMR spectrum of **IIc** in  $\text{CDCl}_3$  at room temperature.

10. 4-((2,6-dimethylphenoxy)methyl)-1-(4-nitrobenzyl)-1*H*-1,2,3-triazole (**IIe**)

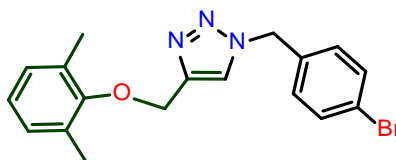

$^1\text{H}$  NMR (400 MHz,  $\text{CDCl}_3$ ):  $\delta$  7.50-7.54 (m, 3H), 7.14-7.16 (m, 2H), 6.91-7.01 (m, 3H), 5.50 (s, 2H), 4.95 (s, 2H), 2.25 (s, 6H) ppm.  $^{13}\text{C}$  NMR (100 MHz,  $\text{CDCl}_3$ ):  $\delta$  155.24, 145.35, 133.61, 132.33, 131.02, 129.69, 128.91, 124.29, 122.98, 122.47, 65.56, 53.52, 16.36 ppm.

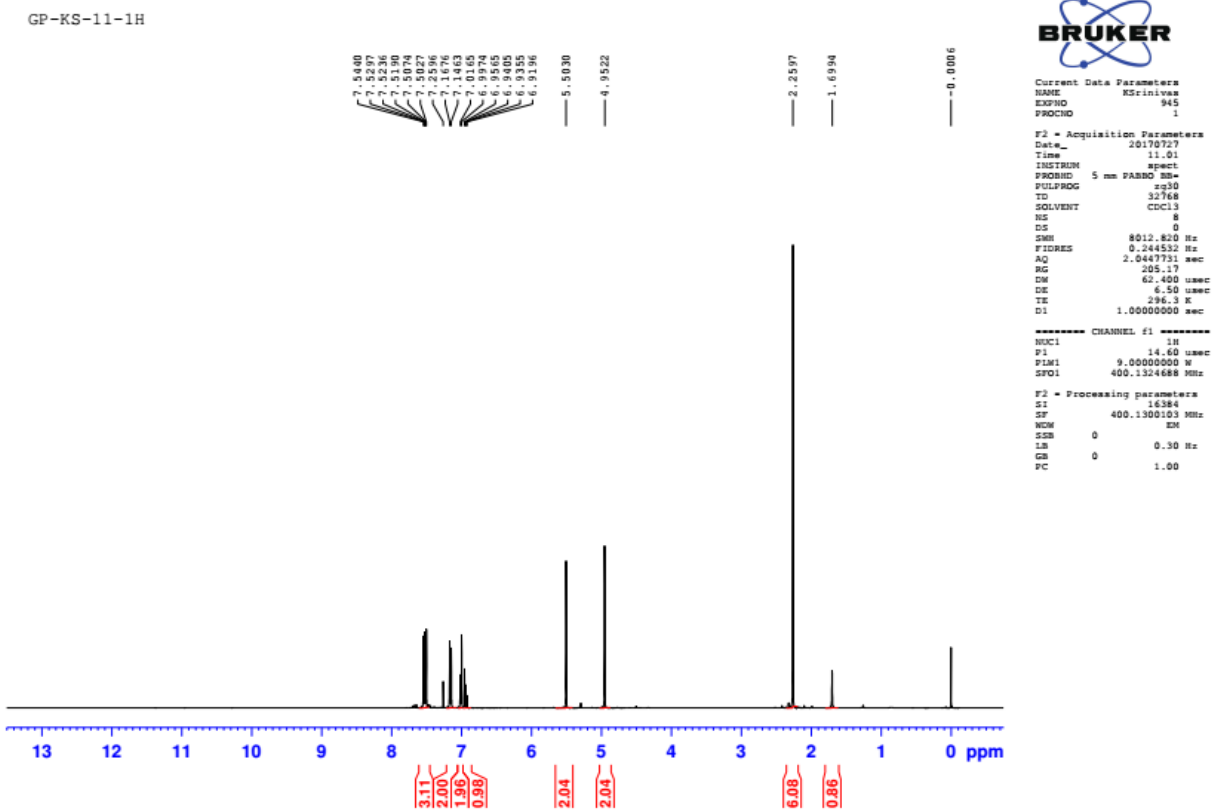

Fig. S75.  $^1\text{H}$  NMR spectrum of **IIe** in  $\text{CDCl}_3$  at room temperature.



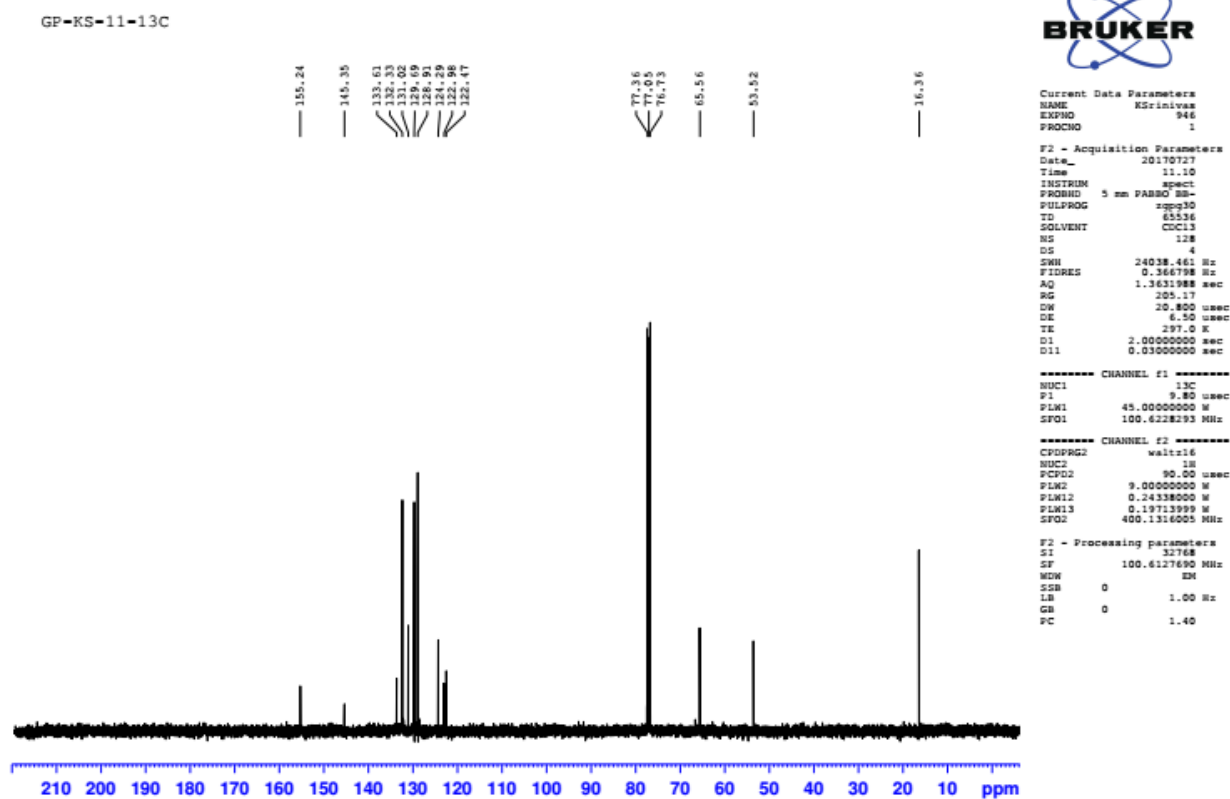

Fig. S76.  $^{13}\text{C}$  NMR spectrum of **IIe** in  $\text{CDCl}_3$  at room temperature.

### 11. 1-(4-nitrobenzyl)-4-phenyl-1H-1,2,3-triazole (**IIIa**)

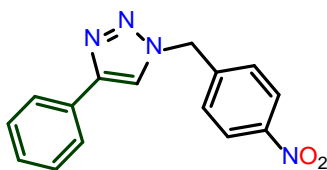

$^1\text{H}$  NMR (400 MHz,  $\text{CDCl}_3$ ):  $\delta$  8.21-8.23 (d, 2H), 7.76-7.81 (m, 3H), 7.33-7.44 (m, 5H), 5.69 (s, 2H) ppm.  $^{13}\text{C}$  NMR (100 MHz,  $\text{CDCl}_3$ ):  $\delta$  148.71, 148.09, 141.78, 132.13, 132.03, 130.11, 128.93, 128.77, 128.57, 125.50, 125.75, 124.33, 119.76, 53.18 ppm.

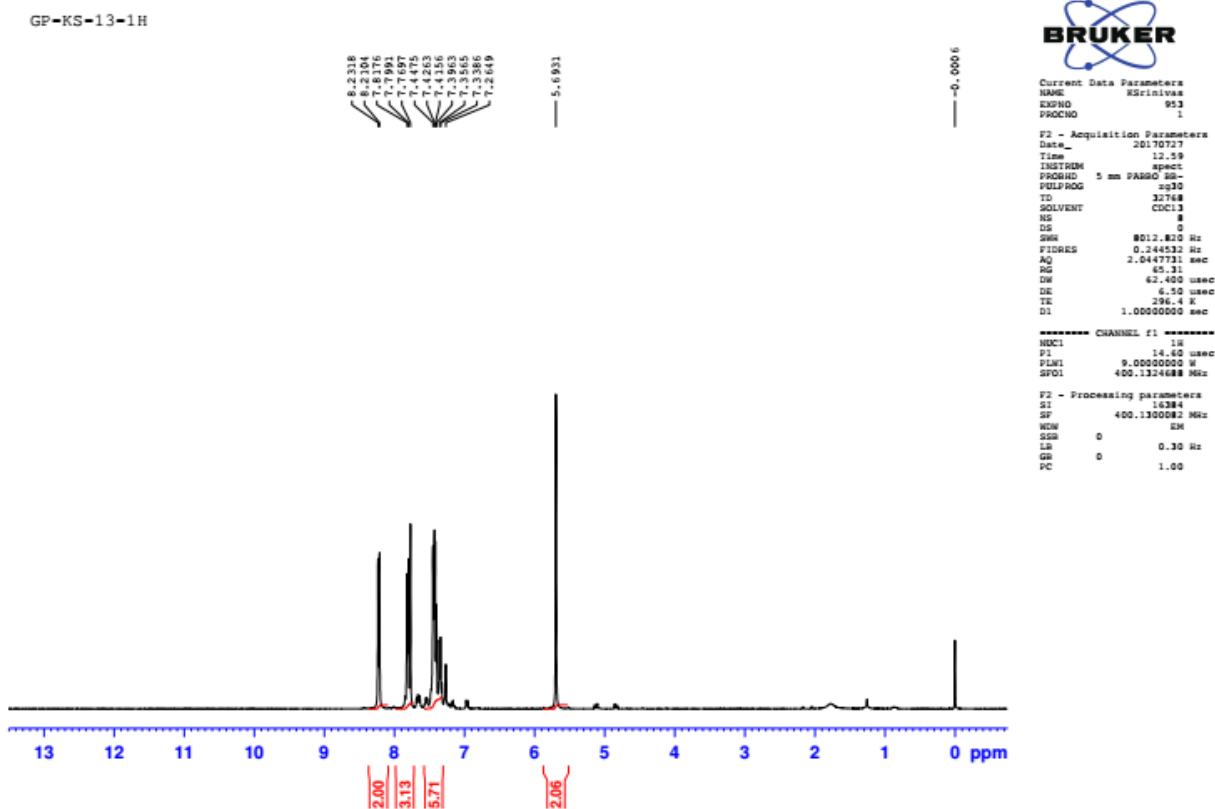

Fig. S77.  $^1\text{H}$  NMR spectrum of **IIIa** in  $\text{CDCl}_3$  at room temperature.

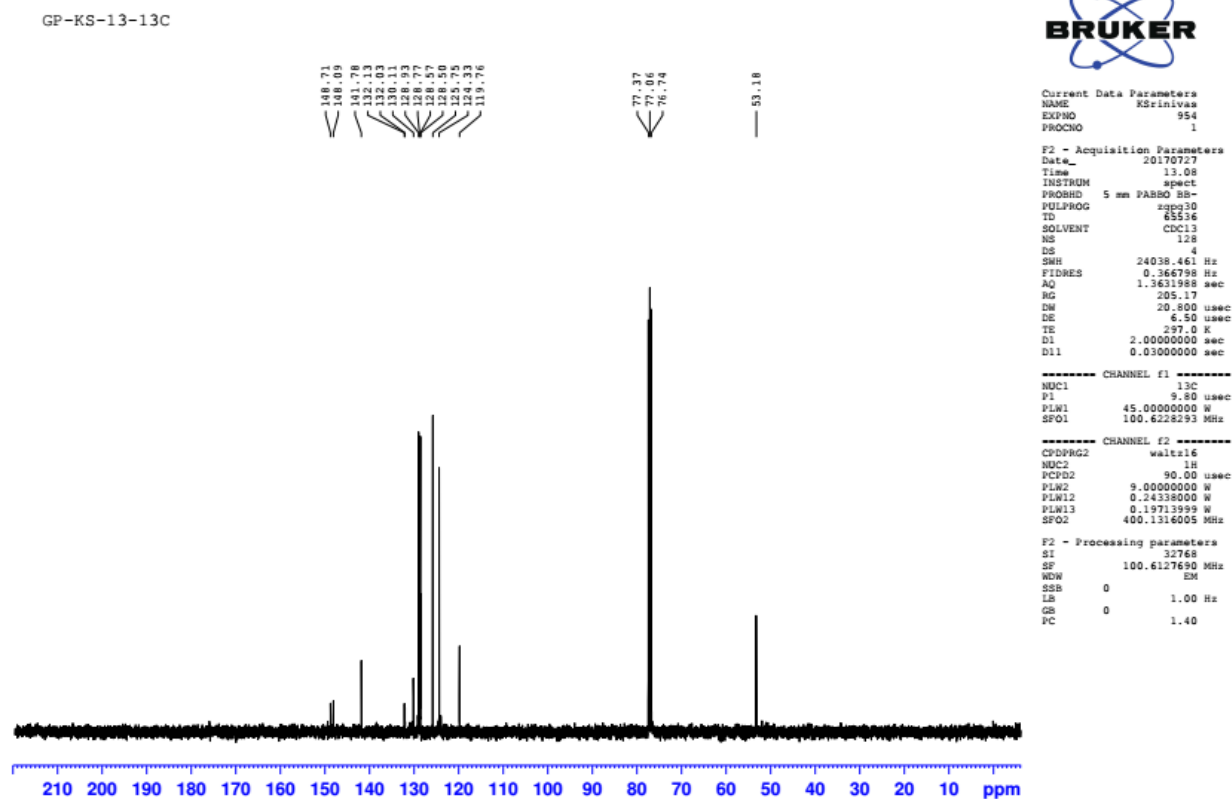

**Fig. S78.**  $^{13}\text{C}$  NMR spectrum of **IIIa** in  $\text{CDCl}_3$  at room temperature.

**12. 1-(4-nitrobenzyl)-4-(*p*-tolyl)-1*H*-1,2,3-triazole (**IIIb**)**

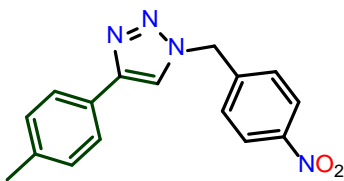

$^1\text{H}$  NMR (400 MHz,  $\text{CDCl}_3$ ):  $\delta$  8.20-8.22 (d, 2H), 7.69-7.75 (m, 3H), 7.41-7.43 (d, 2H), 7.21-7.22 (d, 2H), 5.68 (s, 2H), 2.36 (s, 3H) ppm.  $^{13}\text{C}$  NMR (100 MHz,  $\text{CDCl}_3$ ):  $\delta$  148.06, 141.84, 138.42, 132.13, 129.60, 128.57, 127.33, 125.64, 124.31, 53.19, 21.30 ppm.

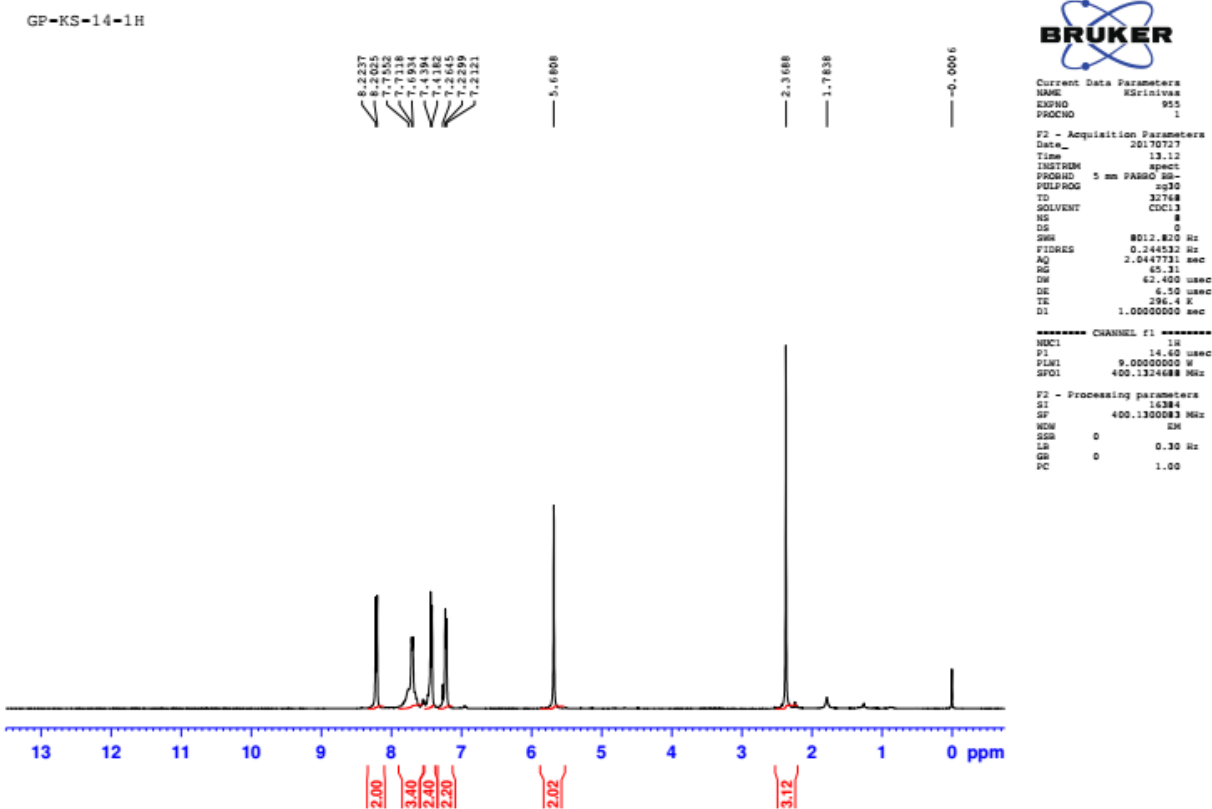

Fig. S79.  $^1\text{H}$  NMR spectrum of **IIIb** in  $\text{CDCl}_3$  at room temperature.

GP-KS-14-13C

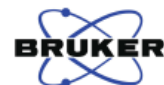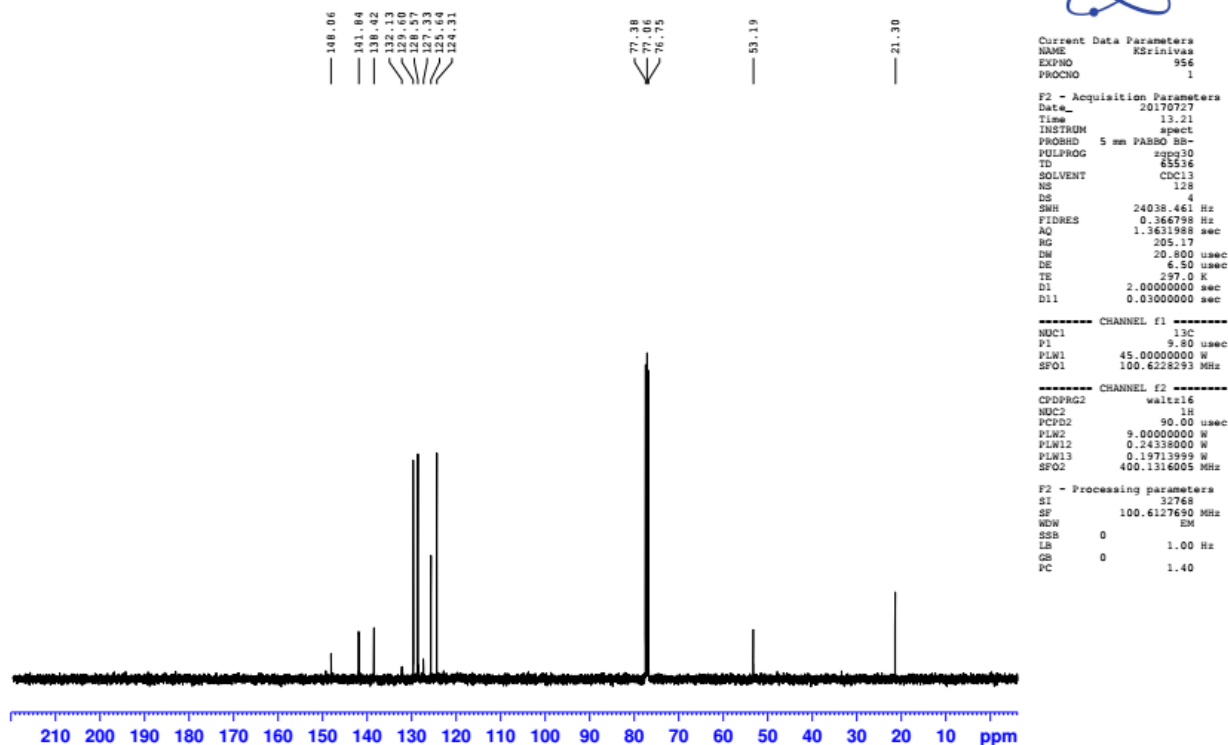

Fig. S80.  $^{13}\text{C}$  NMR spectrum of **IIIb** in  $\text{CDCl}_3$  at room temperature.

### 13. 4-hexyl-1-(4-nitrobenzyl)-1H-1,2,3-triazole (**IIIc**)

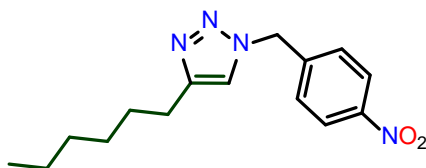

$^1\text{H}$  NMR (400 MHz,  $\text{CDCl}_3$ ):  $\delta$  8.19-8.21 (d, 1H), 7.28-7.64 (m, 4H), 5.62 (s, 2H), 2.71 (t, 2H), 1.65 (m, 2H), 1.29 (m, 6H), 0.86 (t, 3H) ppm.  $^{13}\text{C}$  NMR (100 MHz,  $\text{CDCl}_3$ ):  $\delta$  147.96, 142.15, 132.08, 131.97, 128.64, 128.46, 124.23, 52.96, 31.51, 29.28, 28.88, 25.70, 22.52, 14.03 ppm.

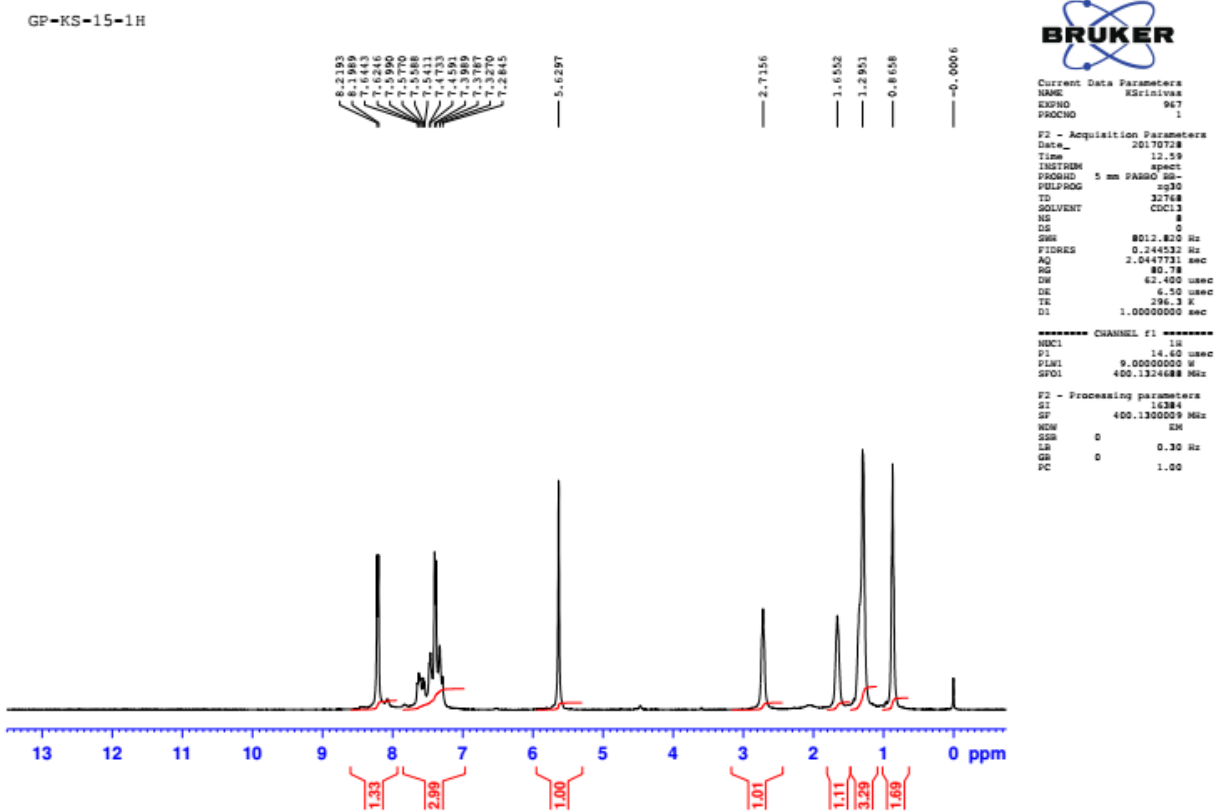

Fig. S81.  $^1\text{H}$  NMR spectrum of **IIIc** in  $\text{CDCl}_3$  at room temperature.

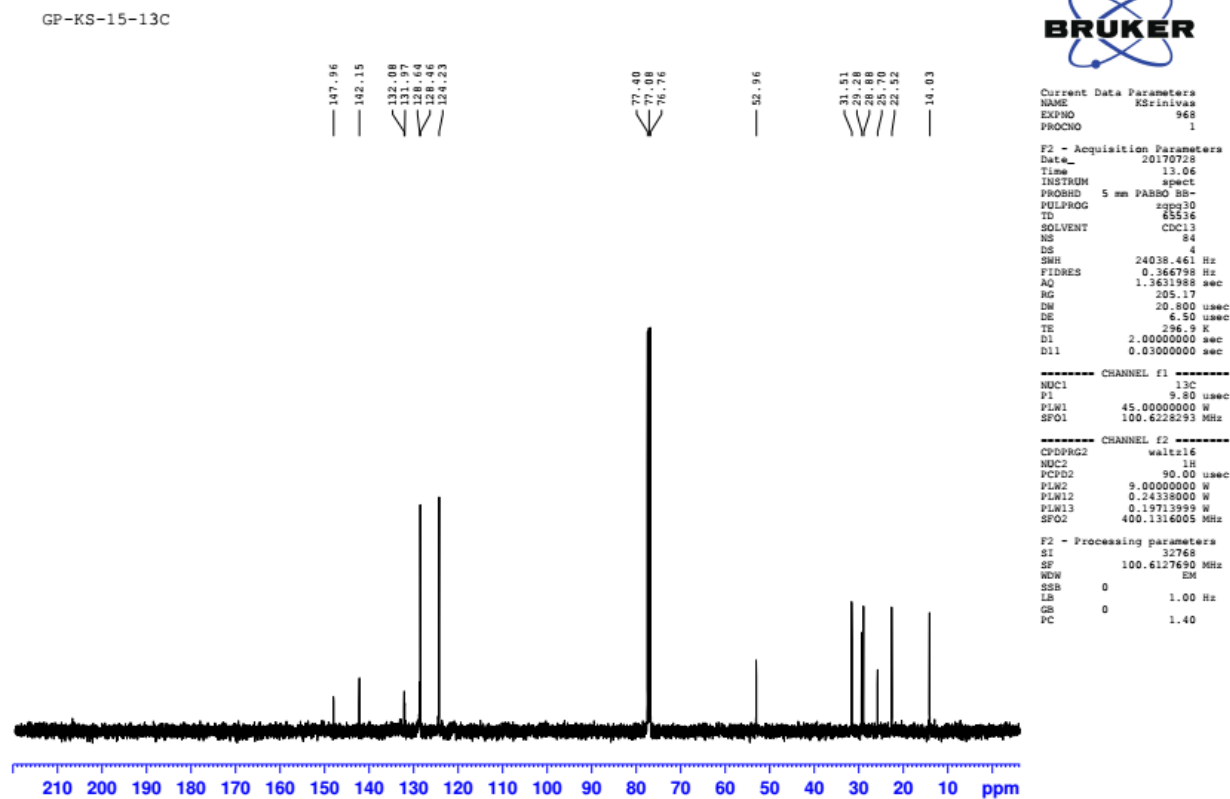

Fig. S82.  $^{13}\text{C}$  NMR spectrum of **IIIc** in  $\text{CDCl}_3$  at room temperature.

14. 1-(4-nitrobenzyl)-4-((*p*-toloxy)methyl)-1*H*-1,2,3-triazole (**IIIId**)

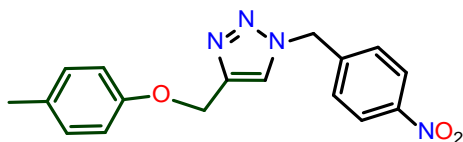

$^1\text{H}$  NMR (400 MHz,  $\text{CDCl}_3$ ):  $\delta$  8.22-8.99 (d, 2H), 7.62 (s, 1H), 7.40-7.38 (d, 2H), 7.08-7.06 (d, 2H), 6.86-6.83 (d, 2H), 5.64 (s, 2H), 5.18 (s, 2H), 2.27 (s, 3H) ppm.  $^{13}\text{C}$  NMR (100 MHz,  $\text{CDCl}_3$ ):  $\delta$  155.94, 148.06, 141.58, 132.08, 131.98, 130.72, 130.02, 128.70, 128.62, 124.32, 122.95, 114.61, 62.08, 53.17, 20.49 ppm.

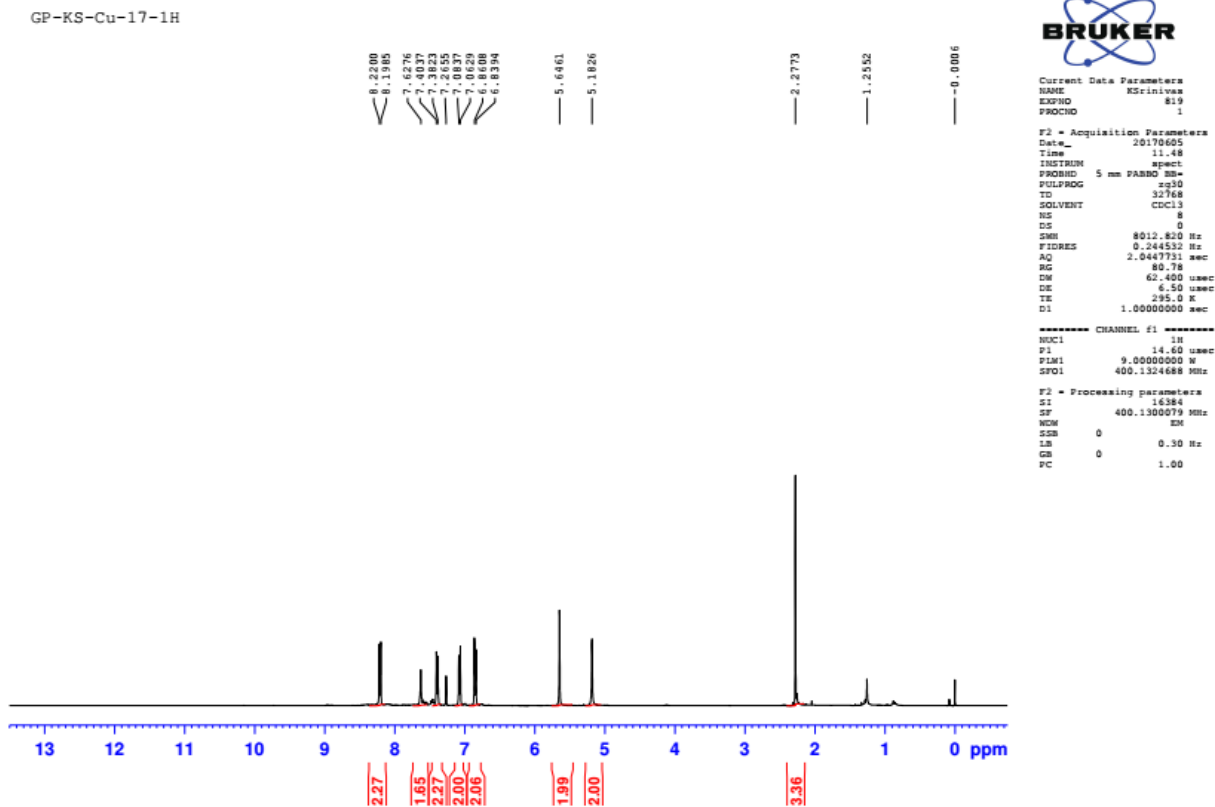

**Fig. S83.**  $^1\text{H}$  NMR spectrum of **IIIId** in  $\text{CDCl}_3$  at room temperature.



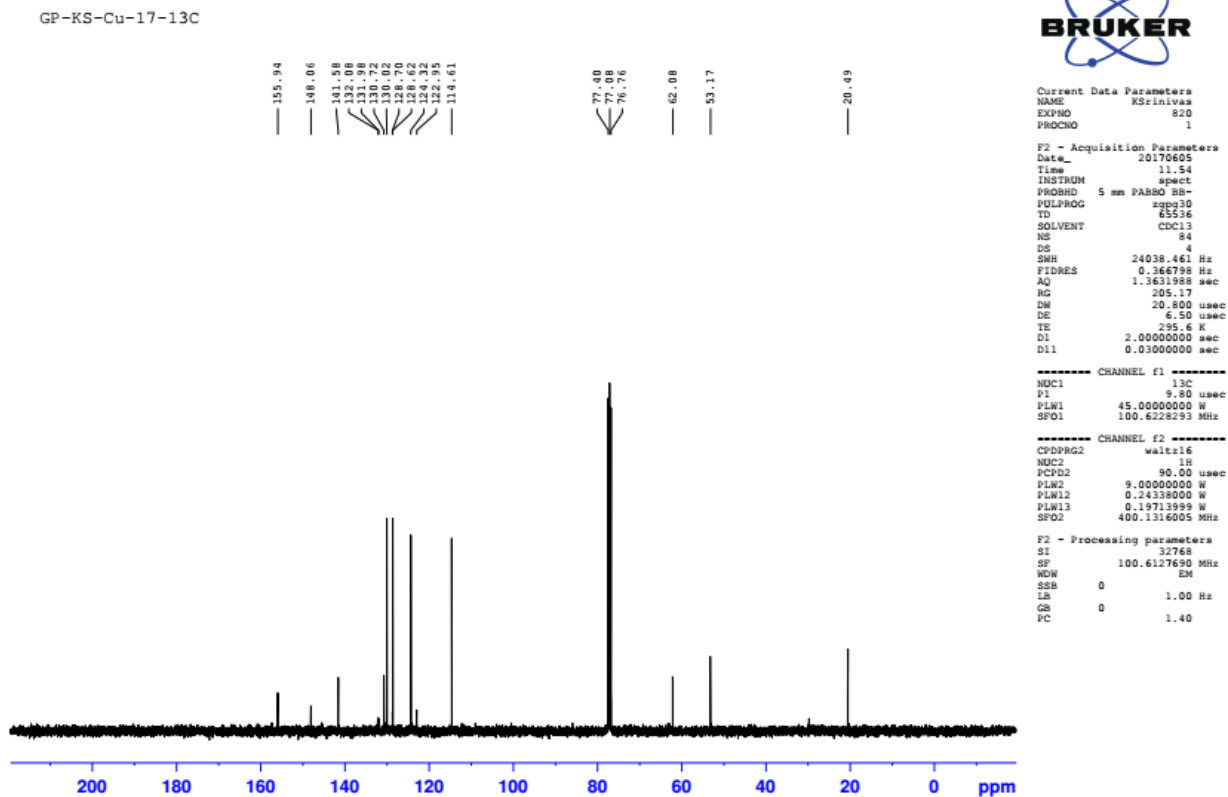

Fig. S84.  $^{13}\text{C}$  NMR spectrum of **IIIc** in  $\text{CDCl}_3$  at room temperature.

15. 4-((2,6-dimethylphenoxy)methyl)-1-(4-nitrobenzyl)-1*H*-1,2,3-triazole (**IIIe**)

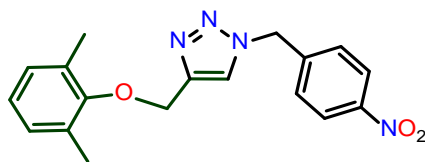

$^1\text{H}$  NMR (400 MHz,  $\text{CDCl}_3$ ):  $\delta$  8.17-8.15 (d, 2H), 7.73 (s, 1H), 7.40-7.38 (m, 2H), 7.00-6.92 (m, 3H), 5.67 (s, 2H), 4.96 (s, 2H), 2.26 (s, 6H) ppm.  $^{13}\text{C}$  NMR (100 MHz,  $\text{CDCl}_3$ ):  $\delta$  155.18, 147.93, 141.90, 132.17, 132.05, 131.95, 130.95, 128.95, 128.64, 128.57, 124.36, 124.21, 123.26, 65.39, 53.06, 16.36 ppm.

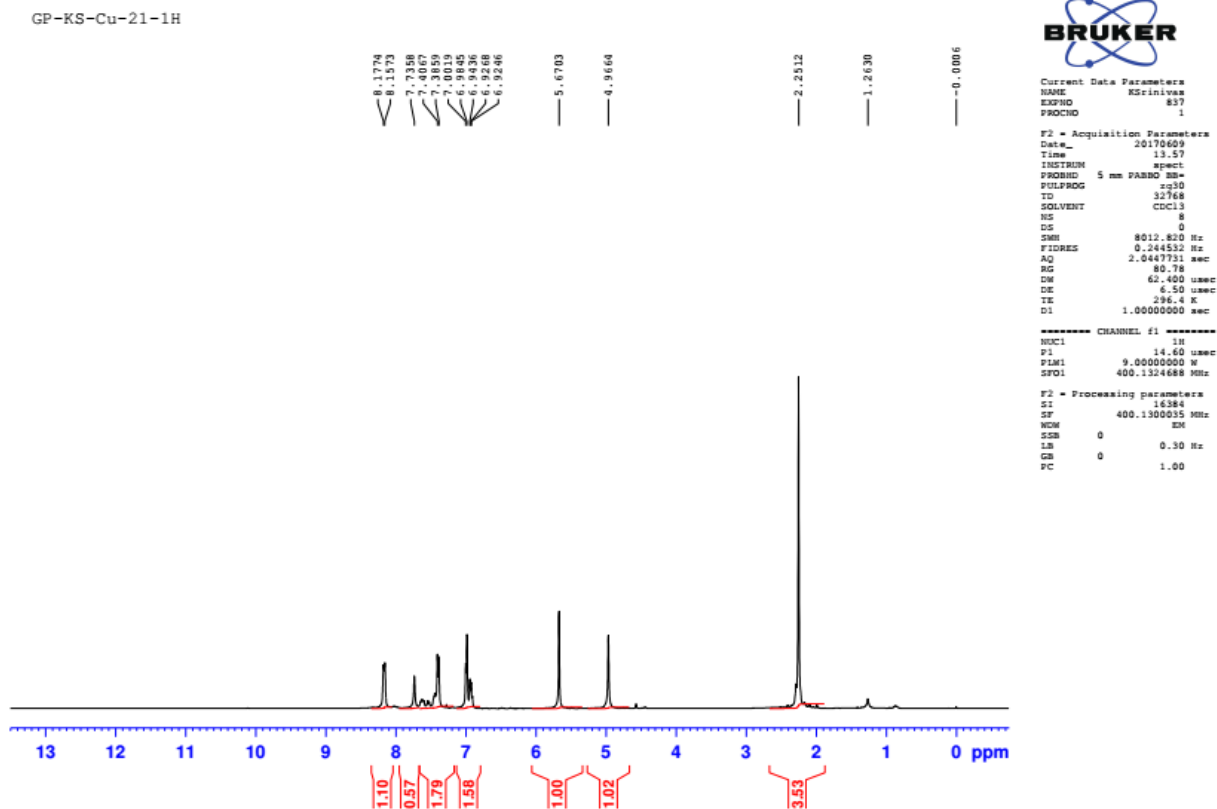

Fig. S85.  $^1\text{H}$  NMR spectrum of **IIIe** in  $\text{CDCl}_3$  at room temperature.

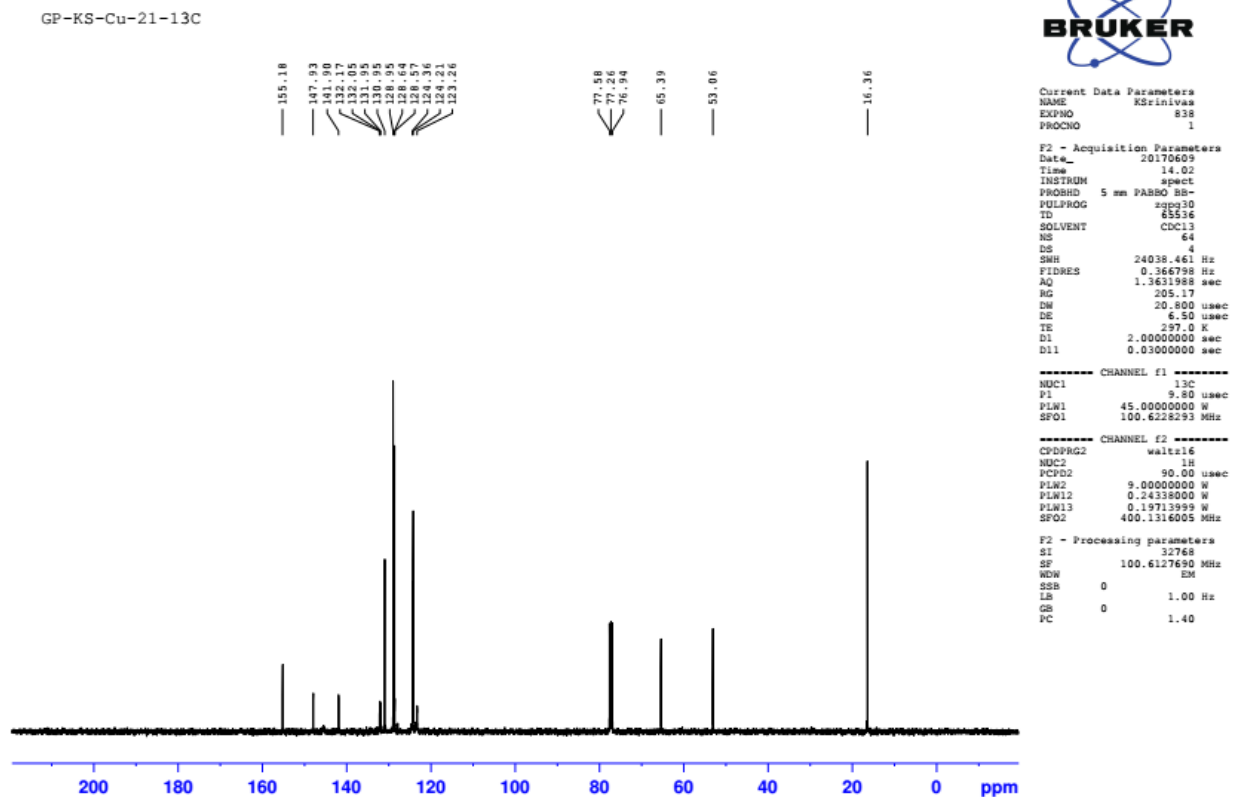

Fig. S86.  $^{13}\text{C}$  NMR spectrum of **IIIe** in  $\text{CDCl}_3$  at room temperature.

### 16. 1,4-diphenyl-1*H*-1,2,3-triazole (**IVa**)

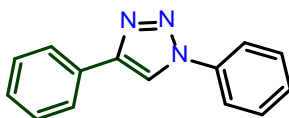

$^1\text{H}$  NMR (400 MHz,  $\text{CDCl}_3$ ):  $\delta$  8.19 (s, 1H), 7.90-7.92 (d, 2H), 7.78-7.80 (d, 2H), 7.52-7.56 (t, 2H), 7.43-7.47 (m, 3H), 7.34-7.38 (m, 1H) ppm.  $^{13}\text{C}$  NMR (100 MHz,  $\text{CDCl}_3$ ):  $\delta$  137.09, 130.27, 129.80, 128.94, 128.79, 128.44, 125.87, 120.55, 117.62 ppm.

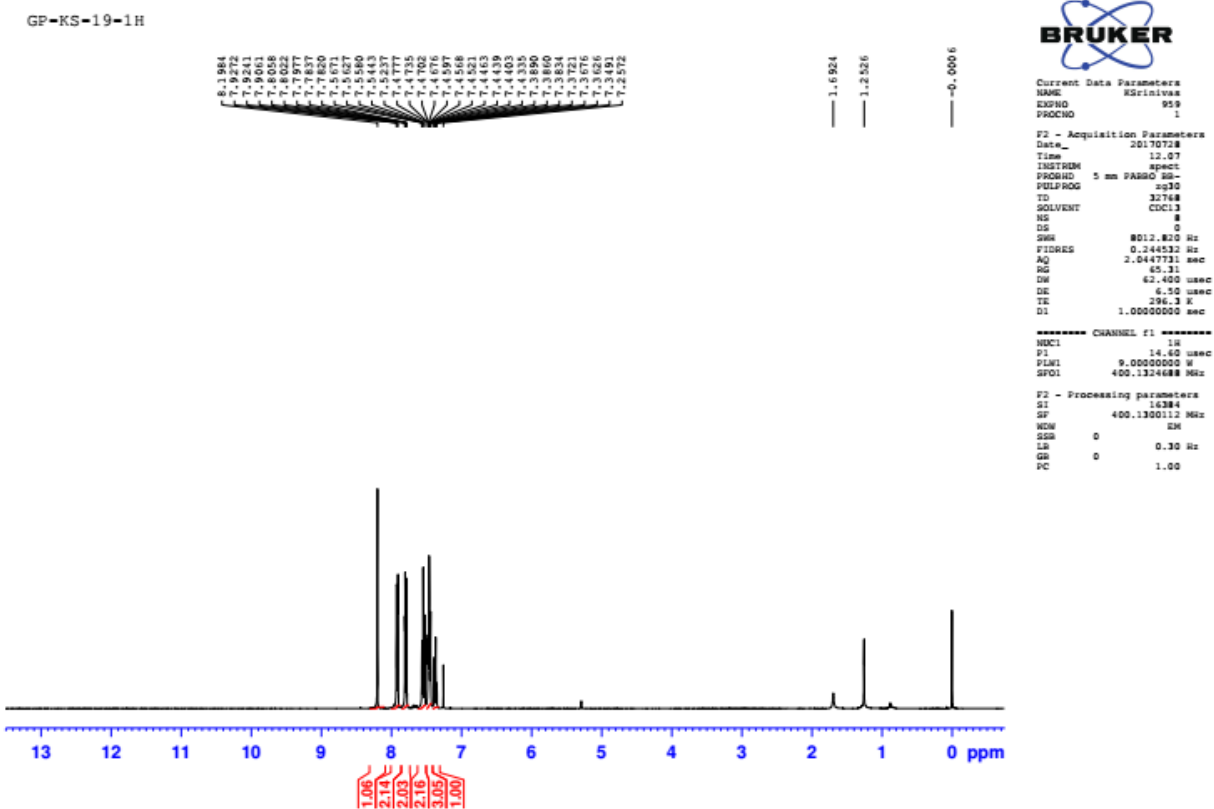

Fig. S87.  $^1\text{H}$  NMR spectrum of **IVa** in  $\text{CDCl}_3$  at room temperature.

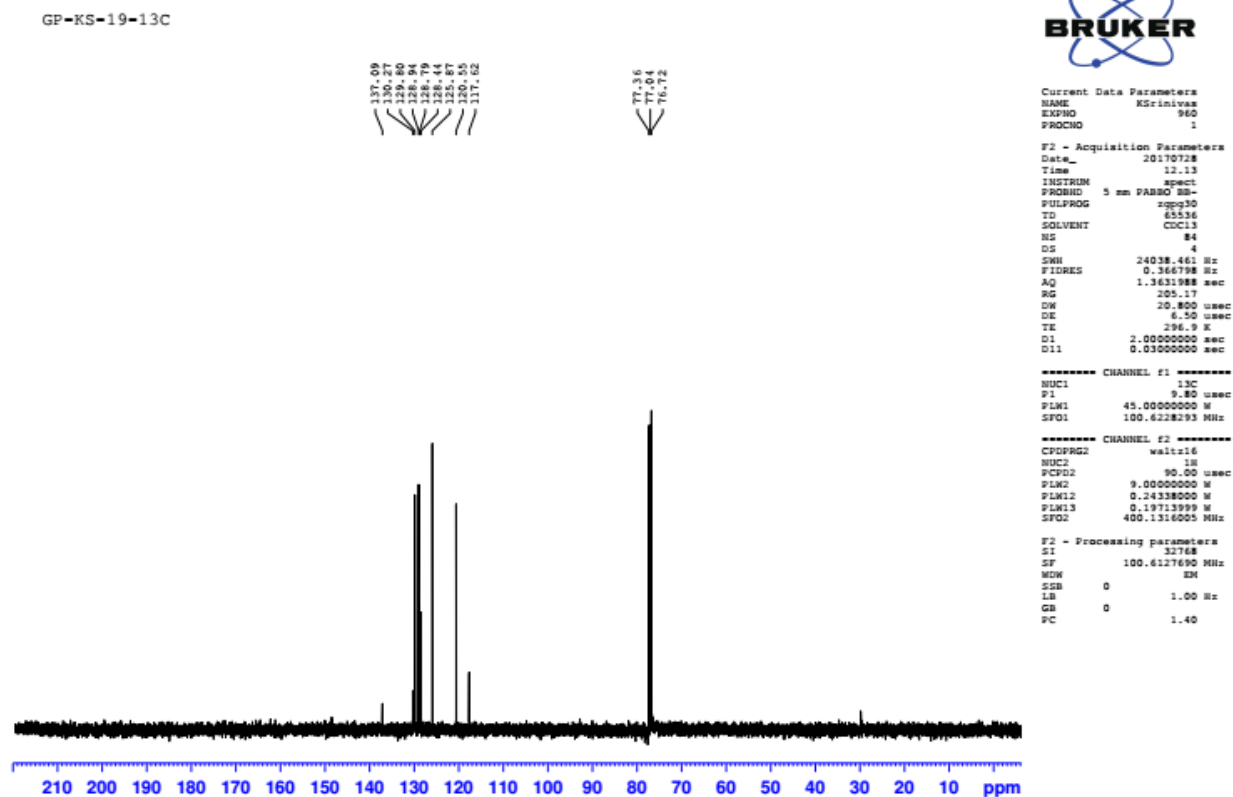

**Fig. S88.**  $^{13}\text{C}$  NMR spectrum of **IVa** in  $\text{CDCl}_3$  at room temperature.

**17. 1-phenyl-4-(*p*-tolyl)-1*H*-1,2,3-triazole (**IVb**)**

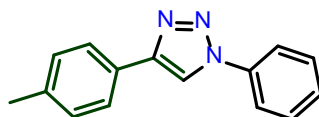

$^1\text{H}$  NMR (400 MHz,  $\text{CDCl}_3$ ):  $\delta$  8.14 (s, 1H), 7.76-7.80 (t, 4H), 7.50-7.54 (t, 2H), 7.41-7.45 (t, 1H), 7.24-7.25 (m, 2H), 2.38 (s, 3H) ppm.  $^{13}\text{C}$  NMR (100 MHz,  $\text{CDCl}_3$ ):  $\delta$  148.50, 138.33, 137.12, 129.77, 129.61, 128.70, 127.43, 125.78, 120.50, 117.28, 21.34 ppm.

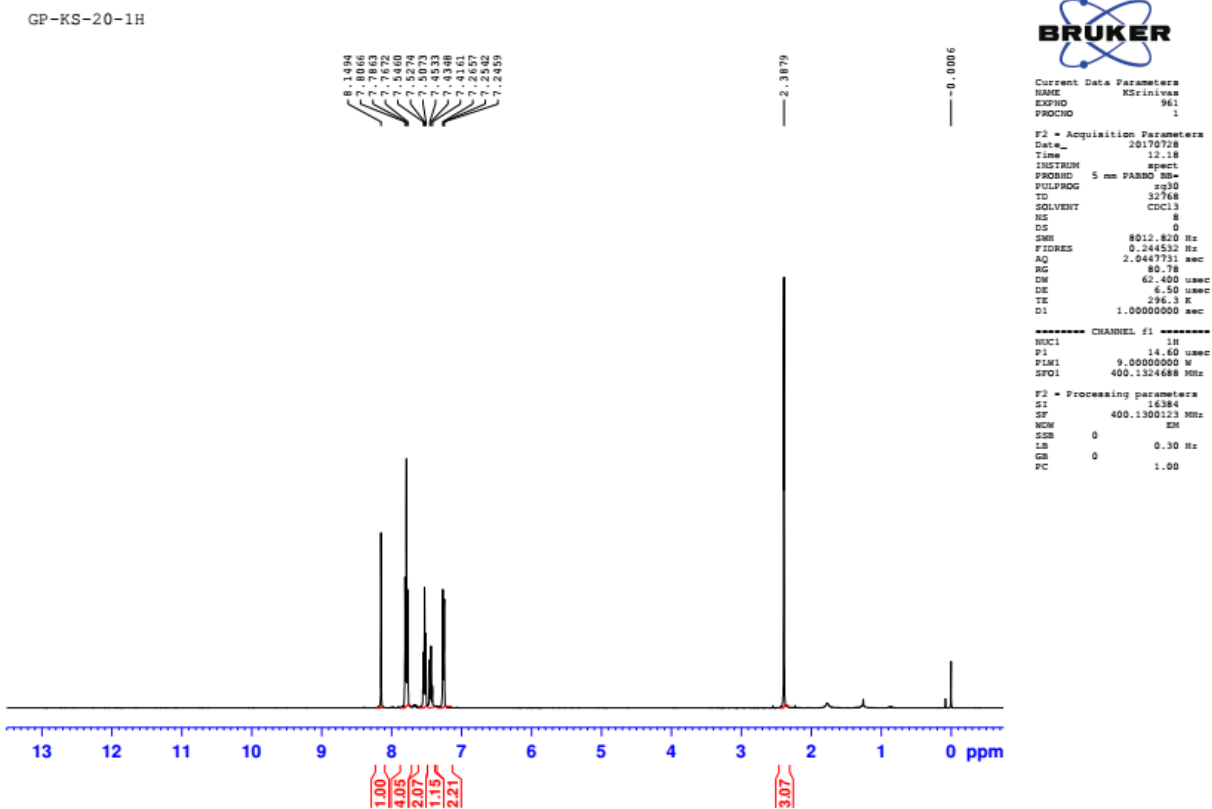

Fig. S89.  $^1\text{H}$  NMR spectrum of **IVb** in  $\text{CDCl}_3$  at room temperature.

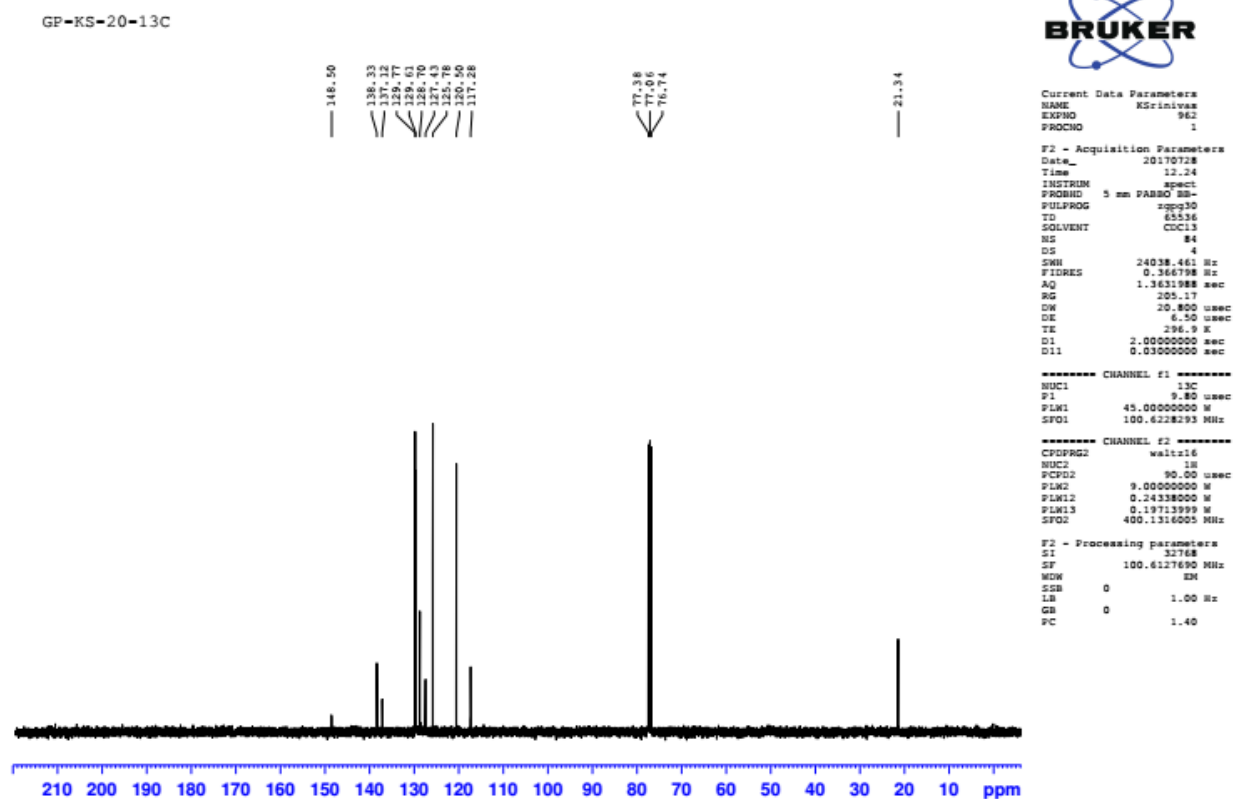

Fig. S90.  $^{13}\text{C}$  NMR spectrum of IVb in  $\text{CDCl}_3$  at room temperature.

### 18. 1-mesityl-4-phenyl-1*H*-1,2,3-triazole (Va)

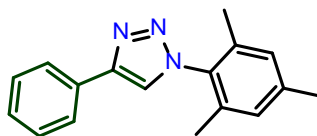

$^1\text{H}$  NMR (400 MHz,  $\text{CDCl}_3$ ):  $\delta$  7.91-7.93 (d, 2H), 7.83 (s, 1H), 7.42-7.46 (m, 2H), 7.32-7.36 (m, 1H), 6.99 (s, 2H), 2.35 (s, 3H), 2.00 (s, 6H) ppm.  $^{13}\text{C}$  NMR (100 MHz,  $\text{CDCl}_3$ ):  $\delta$  147.57, 140.08, 135.11, 133.53, 130.55, 129.13, 128.93, 128.27, 125.76, 121.55, 21.17, 17.35 ppm.

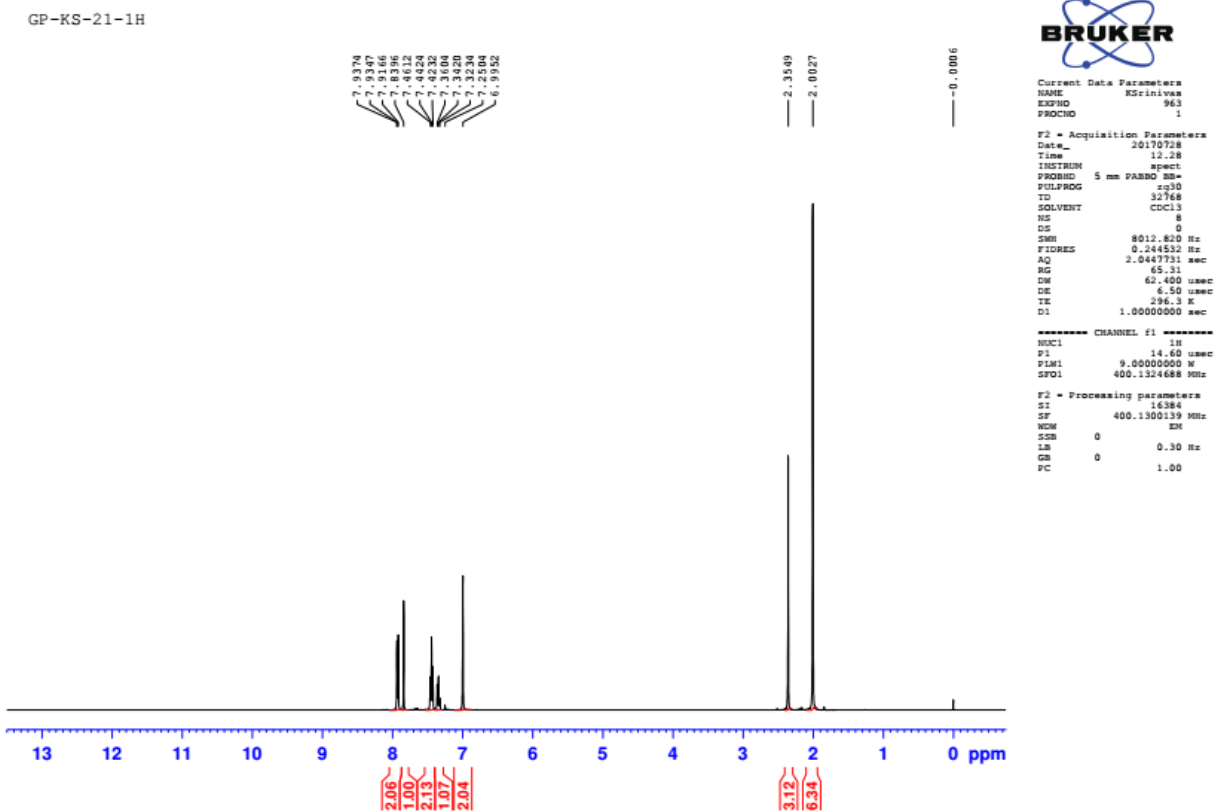

Fig. S91.  $^1\text{H}$  NMR spectrum of **Va** in  $\text{CDCl}_3$  at room temperature.



GP-KS-21-13C

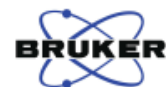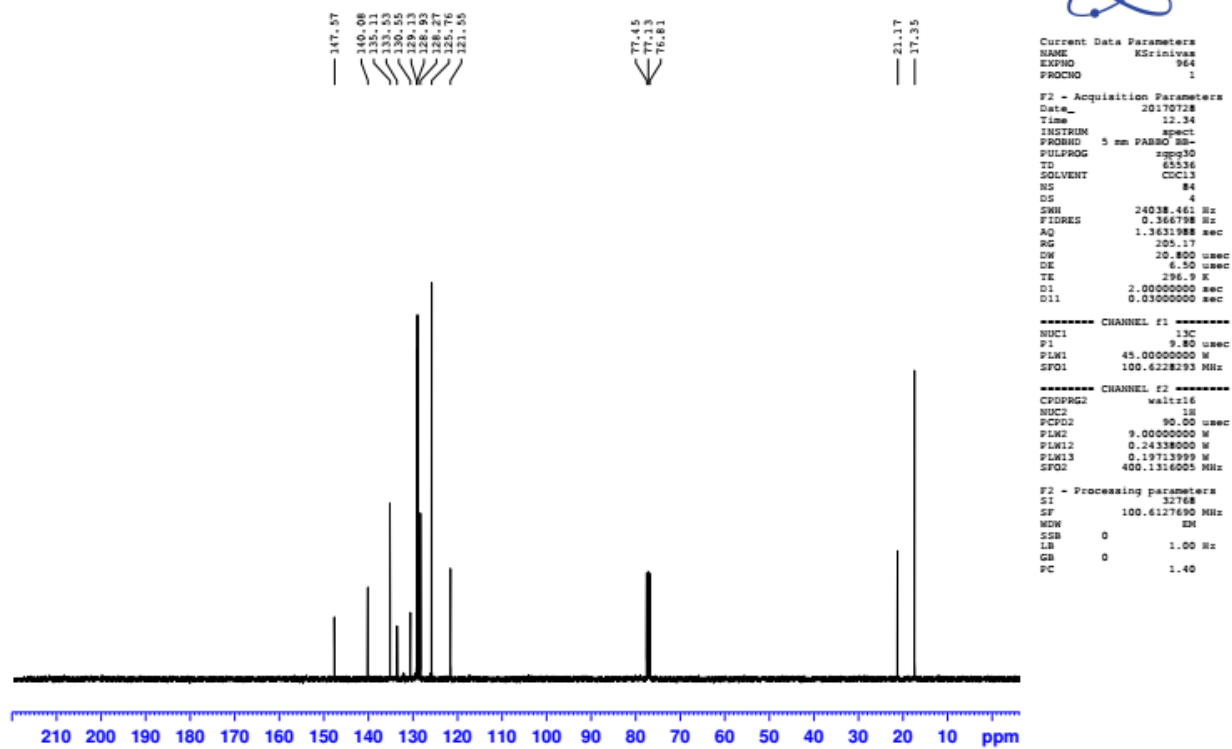

**Fig. S92.**  $^{13}\text{C}$  NMR spectrum of **Va** in  $\text{CDCl}_3$  at room temperature.

**Table S4:** 1,2,3-triazoles isolated by click catalysis by **3**, **6** and **12** in water.

| Entry | Starting Materials                                                                  | Product                                                                             | Isolated Yields (%) |          |           |
|-------|-------------------------------------------------------------------------------------|-------------------------------------------------------------------------------------|---------------------|----------|-----------|
|       |                                                                                     |                                                                                     | <b>3</b>            | <b>6</b> | <b>12</b> |
| 1     | 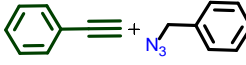   |    | 90                  | 92       | 95        |
| 2     |    |    | 89                  | 85       | 98        |
| 3     |    |    | 85                  | 88       | 92        |
| 4     |    |    | 79                  | 82       | 85        |
| 5     |    |    | 80                  | 83       | 86        |
| 6     |   |   | 86                  | 82       | 86        |
| 7     |  |  | 82                  | 84       | 88        |
| 8     |  |  | 75                  | 78       | 83        |
| 9     |  |  | 84                  | 89       | 85        |
| 10    |  |  | 80                  | 83       | 86        |
| 11    |  |  | 79                  | 80       | 84        |
| 12    |  |  | 82                  | 80       | 85        |

|    |                                                                                                                                               |                                                                                   |          |
|----|-----------------------------------------------------------------------------------------------------------------------------------------------|-----------------------------------------------------------------------------------|----------|
| 13 | 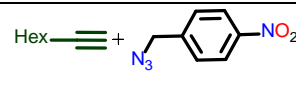<br>Hex-1-yn-3-yl azide + 4-nitrobenzyl azide                |  | 85 88 90 |
| 14 | <br>4-methoxyphenyl propargyl azide + 4-nitrobenzyl azide    |  | 75 80 82 |
| 15 | <br>2,6-dimethylphenyl propargyl azide + 4-nitrobenzyl azide |  | 88 84 86 |
| 16 | <br>Phenyl propargyl azide + benzyl azide                    |  | 76 79 78 |
| 17 | <br>4-methylphenyl propargyl azide + benzyl azide            |  | 79 80 85 |
| 18 | <br>Phenyl propargyl azide + 2,4,6-trimethylbenzyl azide     |  | 85 82 89 |

**Table S5:** Alkynylsilanes isolated by **3**, **6** and **12**. Reaction conditions for X and XI: Phenylacetylene (0.80 mmol), diphenylsilane (0.40 mmol), Catalyst (1 mol%), base (20 mol%), solvent (1.0 mL).

| Entry | Starting Materials                                                                | Product                                                                            | Isolated Yields (%) |          |           |
|-------|-----------------------------------------------------------------------------------|------------------------------------------------------------------------------------|---------------------|----------|-----------|
|       |                                                                                   |                                                                                    | <b>3</b>            | <b>6</b> | <b>12</b> |
| 1     | 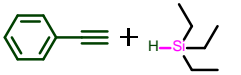 |   | 98                  | 95       | 92        |
| 2     |  |  | 92                  | 99       | 95        |
| 3     |  |   | 90                  | 96       | 94        |
| 4     |  |  | 94                  | 96       | 93        |
| 5     |  |  | 90                  | 98       | 94        |
| 6     |  |  | 93                  | 95       | 96        |
